# Supplementary material
Source: PubMed Central journal article supplement (PMC3517911)

Supporting Information

© Wiley-VCH 2011

69451 Weinheim, Germany

**Alternative Pathways for Heck Intermediates: Palladium-Catalyzed  
Oxyarylation of Homoallylic Alcohols\*\***

*Chen Zhu\* and John R. Falck*

anie\_201101857\_sm\_miscellaneous\_information.pdf

## 1. General Procedures

All reactions were maintained under an argon atmosphere unless otherwise stated. Anhydrous solvents (THF, DME, benzene) were freshly distilled from sodium benzophenone ketyl or from CaH<sub>2</sub> (CH<sub>2</sub>Cl<sub>2</sub>, toluene) under argon. Commercially available reagents were used without further purification. Flash chromatography (FC) was performed using E. Merck silica gel 60 (240–400 mesh). Thin layer chromatography (TLC) was performed using pre-coated plates purchased from E. Merck (silica gel 60 PF254, 0.25 mm). NMR spectra were recorded in CDCl<sub>3</sub>, unless otherwise stated, on spectrometers at operating frequencies of 300/400/500 MHz (<sup>1</sup>H) or 75/100/125 MHz (<sup>13</sup>C) as indicated in the individual spectrum. Chemical shifts ( $\delta$ ) are given in ppm relative to residual solvent (usually chloroform  $\delta = 7.26$  for <sup>1</sup>H NMR or  $\delta = 77.3$  for proton decoupled <sup>13</sup>C NMR) and coupling constants (*J*) in Hz. Multiplicity is tabulated as s for singlet, d for doublet, t for triplet, q for quadruplet, and m for multiplet. Low resolution LC/MS spectra were obtained with an Agilent 1200 series API-LC/MSD spectrometer. High resolution mass spectral analyses were kindly provided by Professor Kasem Nithipatikom at the Medical College of Wisconsin Mass Spectroscopy Facility or at the Mass Spectrometry & Proteomic Facility, University of Notre Dame.

Compound **1b** and **1c** were purchased from Sigma-Aldrich. Compound **1e**, **1f**, *Z*-**1g**, *E*-**1g** and **1h** were purchased from Alfa Aesar. Compound **1j** was purchased from Nu-Chek Prep, Inc. Compound **1a**, **1d** and **4** were prepared according to the reported procedure.<sup>1</sup>

## 2. Survey of Reaction Conditions for the Oxyarylation of Olefins

---

<sup>1</sup> Schmidt, B. *J. Org. Chem.* **2004**, *69*, 7672-7687.

### a. Screening of Lewis acids

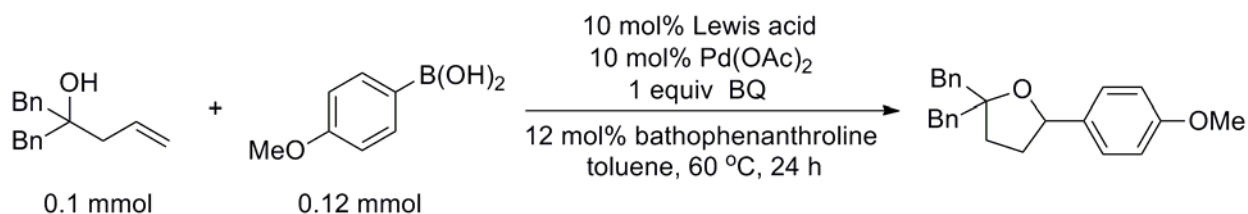

|                 |                      |                   |                   |                      |                      |                    |                                   |
|-----------------|----------------------|-------------------|-------------------|----------------------|----------------------|--------------------|-----------------------------------|
| <b>additive</b> | none                 | AuCl <sub>3</sub> | AuCl              | Ag(TFA)              | Ag(OTf)              | AgSbF <sub>6</sub> | Cp <sub>2</sub> ZrCl <sub>2</sub> |
| <b>yield</b>    | < 10%                | < 10%             | < 10%             | < 10%                | 0%                   | 0%                 | 0%                                |
| <b>additive</b> | Cu(OAc) <sub>2</sub> | CuCl <sub>2</sub> | NiCl <sub>2</sub> | Zn(OTf) <sub>2</sub> | Yb(OTf) <sub>3</sub> | RuCl <sub>3</sub>  | InCl <sub>3</sub>                 |
| <b>yield</b>    | 20%                  | 0%                | 25%               | 20%                  | 27%                  | 32%                | 30%                               |

### b. Screening of catalysts

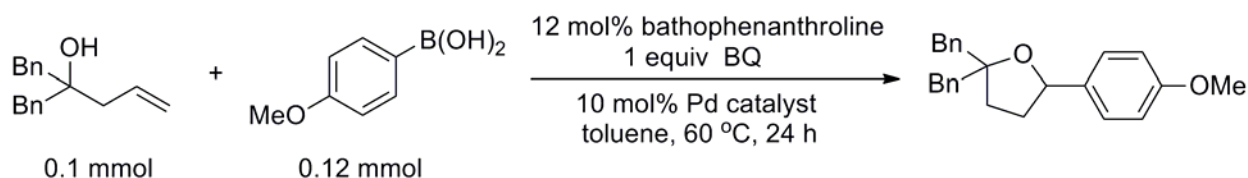

|                 |                              |                                             |                                             |
|-----------------|------------------------------|---------------------------------------------|---------------------------------------------|
| <b>catalyst</b> | 10 mol% Pd(OAc) <sub>2</sub> | 10 mol% Pd(OAc) <sub>2</sub><br>20 mol% TFA | 10 mol% Pd(OAc) <sub>2</sub><br>50 mol% TFA |
| <b>yield</b>    | 15%                          | < 10%                                       | < 10%                                       |
| <b>catalyst</b> | 10 mol% Pd(TFA) <sub>2</sub> | 10 mol% Pd(TFA) <sub>2</sub><br>20 mol% TFA | 10 mol% Pd(TFA) <sub>2</sub><br>50 mol% TFA |
| <b>yield</b>    | < 10%                        | 46%                                         | 40%                                         |

### c. Screening of ligands

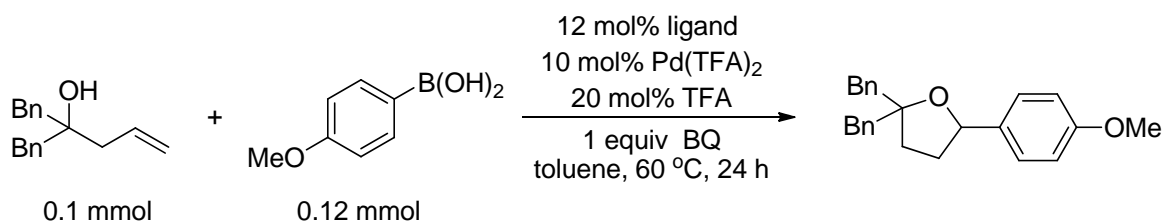

| ligand |       |     |       |     |
|--------|-------|-----|-------|-----|
| yield  | < 10% | 46% | < 10% | 50% |

### d. Screening of solvents and oxidants

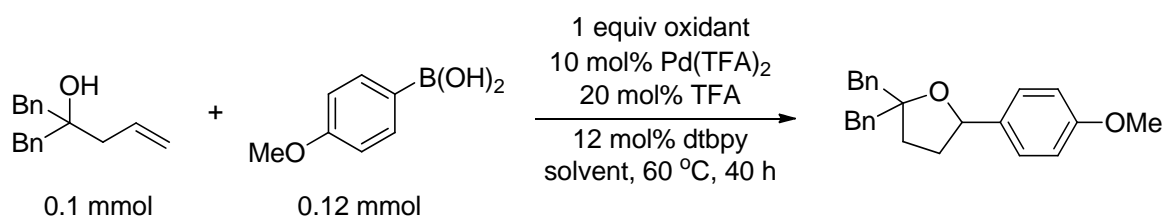

|         |         |       |                    |      |     |                |       |
|---------|---------|-------|--------------------|------|-----|----------------|-------|
| solvent | toluene | THF   | CH <sub>3</sub> CN | DMSO | DCE | DCE            | DCE   |
| oxidant | BQ      | BQ    | BQ                 | BQ   | BQ  | O <sub>2</sub> | Air   |
| yield   | 65%     | < 10% | 46%                | 15%  | 75% | < 10%          | < 10% |

## 3. Representative Procedure: Oxidative Heck Reaction

### Compound 3a

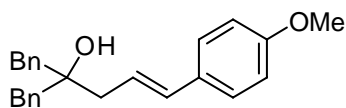

Homoallylic alcohol **1a** (25.2 mg, 0.1 mmol), boronic acid **2a** (18.2 mg, 0.12 mmol), benzoquinone (11 mg, 0.1 mmol), Pd(TFA)<sub>2</sub> (3.3 mg, 0.01 mmol) and bathophenanthroline (4.0 mg,

0.012 mmol) were loaded into a dry vial which was subjected to evacuation/flushing with dry argon three times. Anhydrous toluene (0.8 mL) was syringed into the mixture which was then stirred at 60 °C for 20 h or until the starting material had been consumed as determined by TLC. Upon cooling to room temperature, all volatiles were evaporated and the residue was purified by preparative TLC to give **3a** as yellow oil. *E:Z* = 13:1. *E*-isomer: <sup>1</sup>H NMR (500 MHz) δ 2.30 (d, *J* = 7.0 Hz, 2H), 2.87 (s, 4H), 3.83 (s, 3H), 6.15 (ddd, *J* = 7.5, 7.5, 15.5 Hz, 1H), 6.37 (d, *J* = 16.0 Hz, 1H), 6.88 (d, *J* = 9.0 Hz, 2H), 7.19-7.35 (m, 12H); <sup>13</sup>C NMR (125 MHz) δ 42.6, 46.1, 55.56, 55.59, 74.5, 114.2, 123.4, 126.8, 127.5, 128.5, 130.4, 131.1, 133.6, 137.5, 159.2. FT-IR (CH<sub>2</sub>Cl<sub>2</sub>) 3559, 3028, 2919, 2836, 2361, 2343, 1607, 1511, 1495, 1454, 1298, 1248, 1175, 1113, 1086, 1033, 970, 888, 834, 753, 725, 702 cm<sup>-1</sup>. HRMS calcd for C<sub>25</sub>H<sub>27</sub>O<sub>2</sub> [M+1]<sup>+</sup> 359.2006, found 359.2000.

#### Compound **3b**

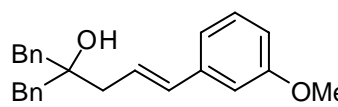 *E:Z* = 20:1. *E*-isomer: <sup>1</sup>H NMR (500 MHz) δ 2.33 (d, *J* = 7.0 Hz, 2H), 2.88 (s, 4H), 3.84 (s, 3H), 6.29 (ddd, *J* = 7.0, 7.0, 14.5 Hz, 1H), 6.40 (d, *J* = 16.0 Hz, 1H), 6.81 (dd, *J* = 2.5, 8.0 Hz, 1H), 6.91 (s, 1H), 6.98 (d, *J* = 7.5 Hz, 1H), 7.23-7.36 (m, 11H); <sup>13</sup>C NMR (125 MHz) δ 42.6, 46.2, 55.5, 74.5, 111.8, 113.1, 119.1, 126.2, 126.8, 128.5, 129.8, 131.0, 134.0, 137.4, 139.1, 160.1. FT-IR (CH<sub>2</sub>Cl<sub>2</sub>) 3558, 3027, 2919, 2835, 1599, 1579, 1494, 1453, 1433, 1289, 1264, 1155, 1086, 1045, 971, 875, 753, 722, 702 cm<sup>-1</sup>. HRMS calcd for C<sub>25</sub>H<sub>27</sub>O<sub>2</sub> [M+1]<sup>+</sup> 359.2006, found 359.1991.

#### Compound **3c**

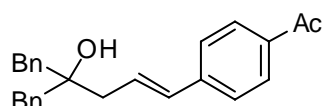 *E:Z* = 20:1. *E*-isomer: <sup>1</sup>H NMR (500 MHz) δ 2.37 (d, *J* = 5.5 Hz, 2H), 2.61 (s, 3H), 2.88 (s, 4H), 6.44-6.46 (m, 2H), 7.27-7.36 (m, 10H), 7.43 (d, *J* = 8.0 Hz, 2H), 7.92 (d, *J* = 8.5 Hz, 2H); <sup>13</sup>C NMR (125 MHz) 26.8, 42.8, 46.3, 74.5, 126.4, 126.9, 128.6, 129.0, 129.4, 131.0, 133.0, 136.0, 137.3, 142.3, 197.8. FT-IR (CH<sub>2</sub>Cl<sub>2</sub>) 3558, 3028, 2919, 1678, 1602, 1494, 1410, 1358, 1268, 1181, 1086, 970, 754, 703 cm<sup>-1</sup>. HRMS calcd for C<sub>26</sub>H<sub>27</sub>O<sub>2</sub> [M+1]<sup>+</sup> 371.2006, found 371.2012.

### Compound 3d

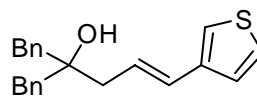  $E:Z = 13:1$ . *E*-isomer:  $^1\text{H}$  NMR (500 MHz)  $\delta$  2.30 (d,  $J = 7.5$  Hz, 2H), 2.87 (s, 4H), 3.74 (s, 1H), 6.13 (ddd,  $J = 7.5, 7.5, 15.0$  Hz, 1H), 6.44 (d,  $J = 16.0$  Hz, 1H), 7.10 (s, 1H), 7.21-7.36 (m, 12H);  $^{13}\text{C}$  NMR (125 MHz) 42.5, 46.2, 74.5, 121.5, 125.2, 125.7, 126.2, 126.8, 128.4, 128.5, 131.0, 137.5, 140.3. FT-IR ( $\text{CH}_2\text{Cl}_2$ ) 3557, 3028, 2920, 1602, 1494, 1454, 1085, 1031, 967, 862, 788, 754, 728, 702  $\text{cm}^{-1}$ . HRMS calcd for  $\text{C}_{22}\text{H}_{23}\text{OS}$   $[\text{M}+1]^+$  335.1464, found 335.1482.

### Compound 5

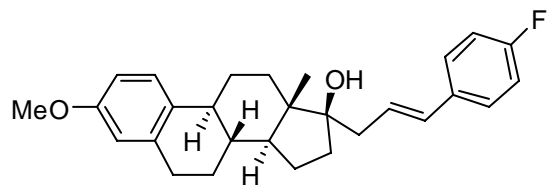  $E:Z = 20:1$ . *E*-isomer:  $^1\text{H}$  NMR (500 MHz)  $\delta$  0.96 (s, 3H), 1.34-1.73 (m, 9H), 1.90-1.95 (m, 1H), 2.04-2.09 (m, 1H), 2.18-2.21 (m, 1H), 2.35-2.43 (m, 2H), 2.54 (dd,  $J = 6.5, 14.0$  Hz, 1H), 2.87-2.91 (m, 2H), 3.80 (s, 3H), 6.35 (ddd,  $J = 7.5, 7.5, 15.0$  Hz, 1H), 6.50 (d,  $J = 16.0$  Hz, 1H), 6.66 (s, 1H), 6.73 (d,  $J = 8.5$  Hz, 1H), 7.01 (dd,  $J = 8.5, 8.5$  Hz, 2H), 7.23 (d,  $J = 8.5$  Hz, 1H), 7.36 (dd,  $J = 5.5, 8.5$  Hz, 2H);  $^{13}\text{C}$  NMR (125 MHz) 14.6, 23.7, 26.6, 27.8, 30.1, 32.1, 35.4, 39.9, 41.2, 44.1, 46.9, 49.9, 55.5, 83.3, 111.7, 114.1, 115.6 (d,  $J_{\text{C-F}} = 21.1$  Hz), 126.5, 126.6, 127.8 (d,  $J_{\text{C-F}} = 8.2$  Hz), 132.8, 132.9, 133.9 (d,  $J_{\text{C-F}} = 3.2$  Hz), 138.2, 157.7, 162.3 (d,  $J_{\text{C-F}} = 245$  Hz). FT-IR ( $\text{CH}_2\text{Cl}_2$ ) 3412, 2932, 2871, 1606, 1508, 1468, 1452, 1290, 1251, 1233, 1158, 1100, 1041, 972, 902, 846, 820, 786, 728  $\text{cm}^{-1}$ . HRMS calcd for  $\text{C}_{28}\text{H}_{33}\text{FO}_2\text{Na}$   $[\text{M}+\text{Na}]^+$  443.2357, found 443.2344.

## 4. Representative Procedure: Oxyarylation of Olefins

### Compound 6a

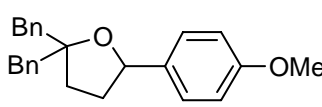 Homoallylic alcohol **1a** (25.2 mg, 0.1 mmol), boronic acid **2a** (18.2 mg, 0.12 mmol), benzoquinone (11 mg, 0.1 mmol),  $\text{Pd}(\text{TFA})_2$  (3.3 mg, 0.01 mmol) and dtbpy (3.2 mg, 0.012 mmol) were loaded into a dry vial which was subjected to evacuation/flushing with dry argon three times. Anhydrous dichloroethane (0.8 mL) followed by trifluoroacetic acid (1.5  $\mu\text{L}$ , 0.02

mmol) were syringed into the mixture which was then stirred at 60 °C for 40 h or until the starting material had been consumed as determined by TLC. Upon cooling to room temperature, all volatiles were evaporated and the residue was purified by preparative TLC to give **6a** as pale yellow oil. <sup>1</sup>H NMR (400 MHz) δ 1.37-1.43 (m, 1H), 1.85-1.90 (m, 1H), 1.90-2.01 (m, 2H), 2.86 (d, 2.93, *J* = 13.6 Hz, 1H), 2.92 (d, *J* = 13.6 Hz, 1H), 2.99 (d, *J* = 13.2 Hz, 1H), 3.01 (d, *J* = 13.6 Hz, 1H), 3.80 (s, 3H), 4.47 (dd, *J* = 5.2, 9.6 Hz, 1H), 6.84 (d, *J* = 8.4 Hz, 2H), 7.13 (d, *J* = 8.8 Hz, 2H), 7.23-7.34 (m, 10H); <sup>13</sup>C NMR (100 MHz) δ 33.5, 34.6, 46.1, 47.1, 55.5, 81.1, 85.7, 113.8, 126.4, 126.5, 128.0, 128.1, 128.2, 131.2, 131.3, 134.6, 138.3, 138.4, 159.2. FT-IR (CH<sub>2</sub>Cl<sub>2</sub>) 3060, 3027, 2936, 2835, 1613, 1513, 1494, 1454, 1302, 1246, 1173, 1082, 1035, 942, 827, 754, 736, 701 cm<sup>-1</sup>. HRMS calcd for C<sub>25</sub>H<sub>27</sub>O<sub>2</sub> [M+1]<sup>+</sup> 359.2006, found 359.2016.

#### Compound **6b**<sup>2</sup>

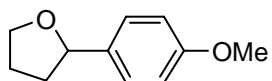

<sup>1</sup>H NMR (500 MHz) δ 1.69-1.75 (m, 1H), 1.91-1.97 (m, 2H), 2.18-2.22 (m, 1H), 3.73 (s, 3H), 3.83 (dd, *J* = 7.5, 14.5 Hz, 1H), 4.01 (dd, *J* = 7.0, 14.0 Hz, 1H), 4.76 (dd, *J* = 7.0, 7.5 Hz, 1H), 6.80 (d, *J* = 8.5 Hz, 2H), 7.19 (d, *J* = 8.5 Hz, 2H).

#### Compound **6c**

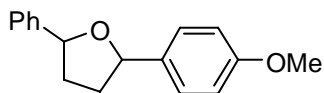

Mixture of two diastereomers (d.r. = 1.4:1). <sup>1</sup>H NMR (500 MHz) δ 1.97-2.05 (m, 4H), 2.40-2.52 (m, 4H), 3.83 (s, 3H), 3.84 (s, 3H), 5.02-5.07 (m, 2H), 5.21-5.29 (m, 2H), 6.91-6.94 (m, 4H), 7.27-7.32 (m, 2H), 7.35-7.47 (m, 12H); <sup>13</sup>C NMR (125 MHz) δ 34.4, 34.6 (two isomers), 35.4, 35.5 (two isomers), 55.5, 55.5 (two isomers), 81.2, 81.2 (two isomers), 81.3, 81.3 (two isomers), 114.2, 114.2 (two isomers), 125.7, 126.1 (two isomers), 127.0, 127.4 (two isomers), 127.2, 127.3 (two isomers), 128.4, 128.5 (two isomers), 135.4, 136.1 (two isomers), 143.4, 144.1 (two isomers), 159.3, 159.4 (two isomers). FT-IR (CH<sub>2</sub>Cl<sub>2</sub>) 2936, 2835, 1612, 1586, 1513, 1452, 1302, 1244, 1173, 1029, 937, 827, 753, 699 cm<sup>-1</sup>. HRMS calcd for C<sub>17</sub>H<sub>18</sub>O<sub>2</sub>Na [M+Na]<sup>+</sup> 277.1199, found 277.1203.

<sup>2</sup> Protti, S.; Dondi, D.; Fagnoni, M.; Albini, A. *Eur. J. Org. Chem.* **2008**, 2240–2247.

### Compound 6d

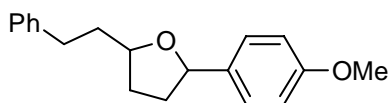

Mixture of two diastereomers (d.r. = 1.2:1).  $^1\text{H}$  NMR (500 MHz)  $\delta$  1.65-1.72 (m, 2H), 1.78-1.92 (m, 4H), 1.98-2.16 (m, 4H), 2.22-2.35 (m, 2H), 2.68-2.85 (m, 4H), 3.80 (s, 6H), 4.00-4.04 (m, 1H), 4.18-4.22 (m, 1H), 4.83 (dd,  $J = 7.0, 7.0$  Hz, 1H), 4.96 (dd,  $J = 7.0, 7.0$  Hz, 1H), 6.87 (d,  $J = 8.0$  Hz, 4H), 7.15-7.30 (m, 14H);  $^{13}\text{C}$  NMR (125 MHz)  $\delta$  31.6, 32.7 (two isomers), 32.8, 32.8 (two isomers), 34.7, 35.7 (two isomers), 38.1, 38.2 (two isomers), 55.5, 55.6 (two isomers), 79.3, 79.4 (two isomers), 80.2, 80.9 (two isomers), 113.9, 114.0 (two isomers), 126.0, 126.0 (two isomers), 127.2, 127.4 (two isomers), 128.6, 128.6 (two isomers), 128.7, 128.7 (two isomers), 135.6, 136.0 (two isomers), 142.5, 142.5 (two isomers), 159.0, 159.1 (two isomers). FT-IR ( $\text{CH}_2\text{Cl}_2$ ) 3061, 3026, 2934, 2861, 2835, 1613, 1585, 1513, 1454, 1302, 1246, 1173, 1035, 829, 747, 699  $\text{cm}^{-1}$ . HRMS calcd for  $\text{C}_{19}\text{H}_{23}\text{O}_2$   $[\text{M}+1]^+$  283.1693, found 283.1696.

### Compound 6e

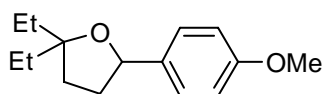

$^1\text{H}$  NMR (500 MHz)  $\delta$  0.94 (t,  $J = 7.5$  Hz, 3H), 0.98 (t,  $J = 7.5$  Hz, 3H), 1.57-1.70 (m, 4H), 1.78-1.88 (m, 3H), 2.20-2.23 (m, 1H), 3.80 (s, 3H), 4.86 (dd,  $J = 5.5, 9.0$  Hz, 2H), 6.87 (d,  $J = 8.5$  Hz, 2H), 7.30 (d,  $J = 8.5$  Hz, 2H);  $^{13}\text{C}$  NMR (100 MHz)  $\delta$  8.8, 9.0, 31.2, 31.6, 35.1, 36.0, 55.5, 80.5, 86.2, 113.9, 127.4, 135.6, 159.0. FT-IR ( $\text{CH}_2\text{Cl}_2$ ) 2964, 1613, 1514, 1462, 1302, 1246, 1172, 1037, 949, 830  $\text{cm}^{-1}$ . HRMS calcd for  $\text{C}_{15}\text{H}_{22}\text{O}_2\text{Na}$   $[\text{M}+\text{Na}]^+$  257.1512, found 257.1524.

### Compound 6f

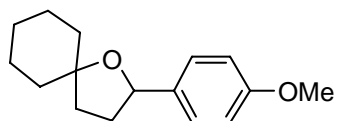

$^1\text{H}$  NMR (500 MHz)  $\delta$  1.37-1.50 (m, 4H), 1.59-1.92 (m, 9H), 2.24-2.27 (m, 1H), 3.80 (s, 3H), 4.92 (dd,  $J = 6.0, 8.5$  Hz, 1H), 6.87 (d,  $J = 8.5$  Hz, 2H), 7.30 (d,  $J = 8.5$  Hz, 2H);  $^{13}\text{C}$  NMR (125 MHz)  $\delta$  24.0, 24.3, 26.0, 35.4, 36.9, 38.2, 38.6, 55.5, 79.8, 83.3, 113.9, 127.3, 136.1, 159.0. FT-IR ( $\text{CH}_2\text{Cl}_2$ ) 2930, 2856, 1726, 1650, 1613, 1513, 1446, 1301, 1246, 1172, 1069, 1038, 952, 828  $\text{cm}^{-1}$ . HRMS calcd for  $\text{C}_{16}\text{H}_{22}\text{O}_2\text{Na}$   $[\text{M}+\text{Na}]^+$  269.1512, found 269.1529.



### Compound 6g

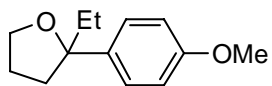

$^1\text{H}$  NMR (500 MHz)  $\delta$  0.77 (t,  $J$  = 7.5 Hz, 3H), 1.76-1.84 (m, 3H), 1.92-2.05 (m, 2H), 2.13-2.18 (m, 1H), 3.81 (s, 3H), 3.86-3.90 (m, 1H), 3.96 (dd,  $J$  = 7.0, 14.5 Hz, 1H), 6.87 (d,  $J$  = 8.5 Hz, 2H), 7.28 (d,  $J$  = 8.5 Hz, 2H);  $^{13}\text{C}$  NMR (125 MHz)  $\delta$  9.1, 25.8, 35.4, 37.9, 55.5, 67.6, 87.2, 113.5, 126.7, 138.8, 158.2. FT-IR ( $\text{CH}_2\text{Cl}_2$ ) 2966, 2934, 2875, 2835, 1610, 1582, 1510, 1463, 1442, 1299, 1247, 1176, 1100, 1037, 911, 830  $\text{cm}^{-1}$ . HRMS calcd for  $\text{C}_{13}\text{H}_{19}\text{O}_2$   $[\text{M}+1]^+$  207.1380, found 207.1380.

### Compound 6h

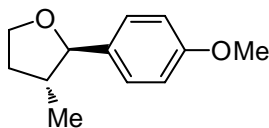

*trans*-Isomer.  $^1\text{H}$  NMR (500 MHz)  $\delta$  1.06 (d,  $J$  = 7.0 Hz, 3H), 1.68-1.73 (m, 1H), 2.02-2.10 (m, 1H), 2.20-2.24 (m, 1H), 3.81 (s, 3H), 4.00-4.03 (m, 1H), 4.08 (dd,  $J$  = 8.0, 15.5 Hz, 1H), 4.23 (d,  $J$  = 8.5 Hz, 1H), 6.89 (d,  $J$  = 8.5 Hz, 2H), 7.27 (d,  $J$  = 8.5 Hz, 2H);  $^{13}\text{C}$  NMR (125 MHz)  $\delta$  16.5, 35.2, 42.8, 55.5, 67.9, 87.9, 113.9, 127.7, 134.3, 159.3. FT-IR ( $\text{CH}_2\text{Cl}_2$ ) 2958, 2871, 1613, 1514, 1462, 1377, 1302, 1246, 1172, 1035, 920, 828  $\text{cm}^{-1}$ . HRMS calcd for  $\text{C}_{12}\text{H}_{17}\text{O}_2$   $[\text{M}+1]^+$  193.1223, found 193.1227.

### Compound 6i

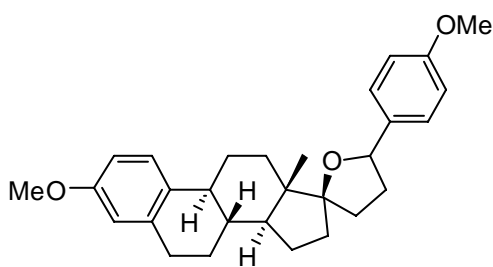

Mixture of two diastereomers (d.r. = 1.3:1).  $^1\text{H}$  NMR (500 MHz)  $\delta$  1.00 (s, 3H), 1.05 (s, 3H), 1.34-1.96 (m, 24H), 2.17-2.38 (m, 10H), 2.87-2.92 (m, 4H), 3.81 (s, 6H), 3.82 (s, 3H), 3.83 (s, 3H), 4.88 (dd,  $J$  = 7.0, 7.0 Hz, 1H), 4.93 (dd,  $J$  = 7.0, 7.0 Hz, 1H), 6.67 (s, 2H), 6.75 (d,  $J$  = 8.5 Hz, 2H), 6.89 (d,  $J$  = 8.5 Hz, 2H), 6.90 (d,  $J$  = 8.5 Hz, 2H), 7.26 (d,  $J$  = 8.5 Hz, 2H), 7.30 (d,  $J$  = 8.5 Hz, 2H), 7.33 (d,  $J$  = 8.5 Hz, 2H);  $^{13}\text{C}$  NMR (125 MHz,  $\text{CDCl}_3$ ):  $\delta$  14.8, 14.9 (two isomers), 23.0, 23.1 (two isomers), 26.6, 26.8 (two isomers), 27.6, 27.6 (two isomers), 30.2, 30.2 (two isomers), 32.4, 33.2 (two isomers), 34.3, 35.9 (two isomers), 35.6, 35.6 (two isomers), 37.6, 37.7 (two isomers), 39.7, 39.8 (two isomers), 44.1, 44.2 (two isomers), 45.7, 45.8 (two isomers), 50.1, 50.1 (two isomers), 55.5, 55.5 (two isomers), 55.5, 55.6 (two isomers), 79.7, 80.2 (two isomers), 94.2, 94.6 (two isomers), 111.7,

111.8 (two isomers), 113.9, 113.9 (two isomers), 114.0, 114.0 (two isomers), 126.6, 126.7 (two isomers), 127.1, 127.3 (two isomers), 132.9, 133.0 (two isomers), 136.2, 136.8 (two isomers), 138.3, 138.3 (two isomers), 157.7, 157.7 (two isomers), 159.0, 159.0 (two isomers). FT-IR (CH<sub>2</sub>Cl<sub>2</sub>, cm<sup>-1</sup>): 2933, 2869, 2835, 1611, 1576, 1513, 1500, 1464, 1377, 1301, 1280, 1246, 1171, 1072, 1040, 872, 830, 782 cm<sup>-1</sup>. HRMS calcd for C<sub>29</sub>H<sub>36</sub>O<sub>3</sub>Na [M+Na]<sup>+</sup> 455.2557, found: 455.2567.

### Compound **6j**

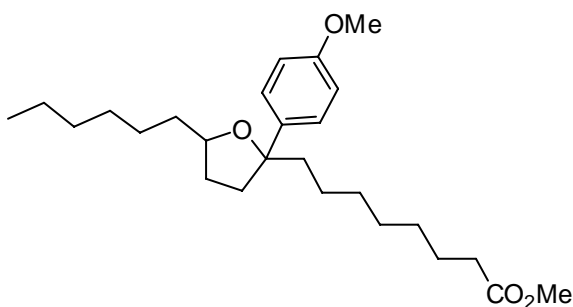

Mixture of two diastereomers (d.r. = 1.3:1). <sup>1</sup>H NMR (500 MHz) δ 0.87-1.10 (m, 6H), 1.20-1.40 (m, 30H), 1.40-1.49 (m, 4H), 1.52-1.58 (m, 6H), 1.63-1.75 (m, 6H), 1.82-1.86 (m, 1H), 1.96-2.06 (m, 3H), 2.10-2.20 (m, 2H), 2.72 (dd, *J* = 7.5, 7.5 Hz, 4H), 3.66 (s, 6H), 3.81 (s, 6H), 3.87-3.90 (m, 1H), 4.01-4.07 (m, 1H), 6.85 (d, *J* = 8.5 Hz, 2H), 6.86 (d, *J* = 8.5 Hz, 2H), 7.27 (d, *J* = 8.5 Hz, 2H), 7.31 (d, *J* = 9.0 Hz, 2H); <sup>13</sup>C NMR (125 MHz) δ 14.4, 14.4 (two isomers), 22.9, 22.9 (two isomers), 24.6, 24.6 (two isomers), 25.2, 25.2 (two isomers), 26.4, 26.6 (two isomers), 29.3, 29.3 (two isomers), 29.4, 29.4 (two isomers), 29.7, 29.7 (two isomers), 30.0, 30.1 (two isomers), 31.5, 31.7 (two isomers), 32.1, 32.1 (two isomers), 34.3, 34.3 (two isomers), 36.4, 36.6 (two isomers), 37.8, 39.1 (two isomers), 43.1, 44.0 (two isomers), 51.7, 51.7 (two isomers), 55.4, 55.4 (two isomers), 78.7, 80.0 (two isomers), 86.4, 86.5 (two isomers), 113.2, 113.5 (two isomers), 126.6, 126.7 (two isomers), 140.1, 140.5 (two isomers), 158.0, 158.1 (two isomers), 174.6, 174.6 (two isomers). FT-IR (CH<sub>2</sub>Cl<sub>2</sub>) 2931, 2856, 1741, 1611, 1582, 1510, 1462, 1440, 1299, 1246, 1174, 1101, 1038, 831 cm<sup>-1</sup>. HRMS calcd for C<sub>26</sub>H<sub>42</sub>O<sub>4</sub>Na [M+Na]<sup>+</sup> 441.2975, found 441.3011.

### Compound **6k**

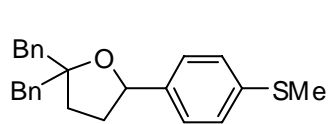

<sup>1</sup>H NMR (500 MHz) δ 1.28-1.43 (m, 1H), 1.90-2.02 (m, 3H), 2.49 (s, 3H), 2.86 (d, *J* = 13.5 Hz, 1H), 2.93 (d, *J* = 13.5 Hz, 1H), 2.99 (d, *J* = 13.5 Hz, 1H), 3.01 (d, *J* = 13.5 Hz, 1H), 4.49 (dd, *J* = 5.5, 9.5 Hz, 1H), 7.14 (d, *J* = 8.0 Hz, 2H), 7.20 (d, *J* = 8.5 Hz, 2H), 7.24-7.32 (m, 10H); <sup>13</sup>C NMR

(125 MHz)  $\delta$  16.4, 33.4, 34.7, 46.1, 47.1, 80.9, 86.0, 126.47, 126.54, 126.9, 127.2, 128.1, 128.2, 131.2, 131.3, 137.3, 138.2, 138.3, 139.7. FT-IR (CH<sub>2</sub>Cl) 3025, 2918, 1725, 1600, 1494, 1453, 1081, 1041, 942, 812, 754, 701 cm<sup>-1</sup>. HRMS calcd for C<sub>25</sub>H<sub>27</sub>OS [M+1]<sup>+</sup> 375.1777, found 375.1779.

#### Compound **6l**

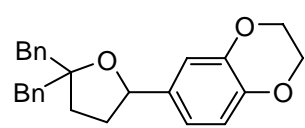 <sup>1</sup>H NMR (500 MHz)  $\delta$  1.28-1.43 (m, 1H), 1.84-1.88 (m, 1H), 1.90-2.01 (m, 2H), 2.85 (d, *J* = 13.5 Hz, 1H), 2.93 (d, *J* = 13.5 Hz, 1H), 3.00 (d, *J* = 14.0 Hz, 1H), 3.01 (d, *J* = 13.5 Hz, 1H), 4.26 (s, 4H), 4.40 (dd, *J* = 5.0, 8.0 Hz, 1H), 6.70 (dd, *J* = 2.0, 8.0 Hz, 1H), 6.80 (s, 1H), 6.81 (dd, *J* = 2.0, 8.0 Hz, 1H), 7.24-7.33 (m, 10H); <sup>13</sup>C NMR (125 MHz)  $\delta$  33.4, 34.6, 46.0, 47.2, 64.6, 64.6, 81.0, 85.7, 115.7, 117.1, 119.8, 126.4, 126.5, 128.2, 128.2, 131.3, 131.3, 135.8, 138.2, 138.3, 143.0, 143.5. FT-IR (CH<sub>2</sub>Cl<sub>2</sub>) 3061, 3027, 2973, 2934, 2874, 1592, 1509, 1495, 1454, 1434, 1309, 1287, 1258, 1069, 1051, 931, 904, 887, 814, 754, 702 cm<sup>-1</sup>. HRMS calcd for C<sub>26</sub>H<sub>27</sub>O<sub>3</sub> [M+1]<sup>+</sup> 387.1955, found 387.1938.

#### Compound **6m**

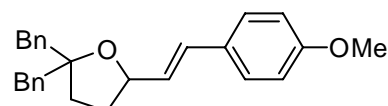 <sup>1</sup>H NMR (500 MHz)  $\delta$  0.96-1.01 (m, 1H), 1.48-1.55 (m, 1H), 1.78-1.83 (m, 2H), 2.73 (d, *J* = 13.5 Hz, 1H), 2.74 (d, *J* = 14.0 Hz, 1H), 2.87 (d, *J* = 13.5 Hz, 1H), 2.91 (d, *J* = 14.0 Hz, 1H), 3.74 (s, 3H), 4.05 (dd, *J* = 8.0, 14.0 Hz, 1H), 5.71 (dd, *J* = 7.5, 15.5 Hz, 1H), 6.30 (d, *J* = 16.0 Hz, 1H), 6.77 (d, *J* = 8.5 Hz, 2H), 7.16-7.24 (m, 12H); <sup>13</sup>C NMR (125 MHz)  $\delta$  33.17, 33.20, 46.9, 47.3, 55.5, 81.1, 86.0, 114.1, 126.4, 126.5, 127.9, 128.0, 128.2, 128.7, 129.9, 130.6, 131.1, 131.3, 138.3, 138.4, 159.3. FT-IR (CH<sub>2</sub>Cl<sub>2</sub>) 2921, 2850, 1606, 1512, 1301, 1250, 1175, 1083, 1035, 967, 806, 755, 731, 702 cm<sup>-1</sup>. HRMS calcd for C<sub>27</sub>H<sub>29</sub>O<sub>2</sub> [M+1]<sup>+</sup> 385.2162, found 385.2151.

## 5. Deuterium Experiments

Compounds **7a** and **7b** were prepared according to reported procedures.<sup>3</sup>

### Compound **7a**

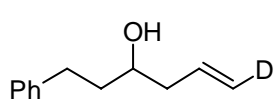 Deuterium incorporation was determined by <sup>1</sup>H NMR to be 86%. <sup>1</sup>H NMR (500 MHz) δ 1.65 (br s, 1H), 1.78-1.84 (m, 2H), 2.16-2.24 (m, 1H), 2.31-2.37 (m, 1H), 2.67-2.74 (m, 1H), 2.80-2.86 (m, 1H), 3.66-3.74 (m, 1H), 5.15 (d, *J* = 17.0 Hz, 1 H), 5.83 (dt, *J* = 17.0, 7.5 Hz, 1H), 7.18-7.26 (m, 3H), 7.30 (t, *J* = 7.5 Hz, 2 H).

### Compound **7b**

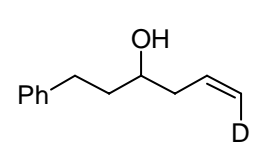 Deuterium incorporation was determined by <sup>1</sup>H NMR to be 86%. <sup>1</sup>H NMR (500 MHz) δ 1.65 (br s, 1H), 1.78-1.84 (m, 2H), 2.17-2.23 (m, 1H), 2.32-2.38 (m, 1H), 2.66-2.75 (m, 1H), 2.78-2.87 (m, 1H), 3.67-3.73 (m, 1H), 5.15 (d, *J* = 10.0 Hz, 1 H), 5.79-5.88 (m, 1H), 7.18-7.25 (m, 3H), 7.32 (t, *J* = 7.5 Hz, 2 H).

<sup>3</sup> K. S. Lee, J. M. Ready, *Angew. Chem. Int. Ed.* **2011**, *50*, 2111.

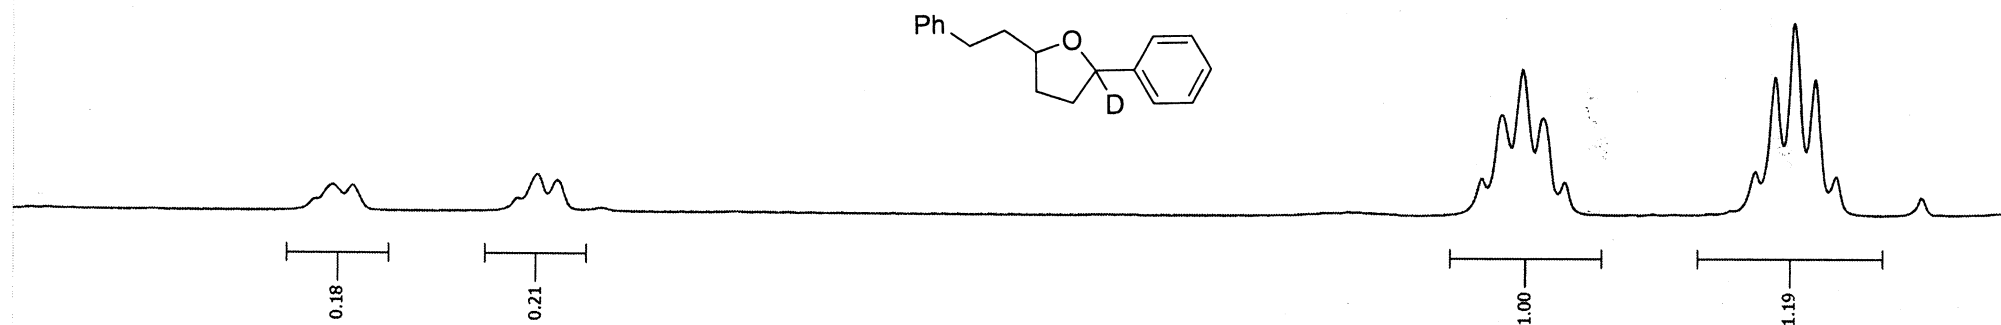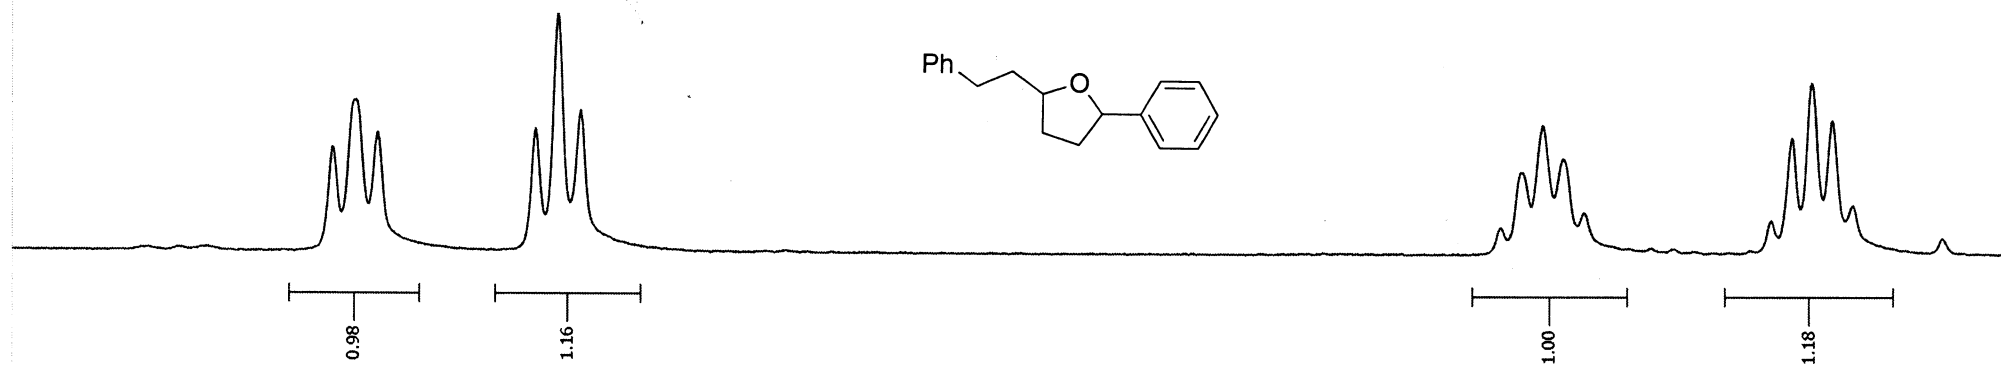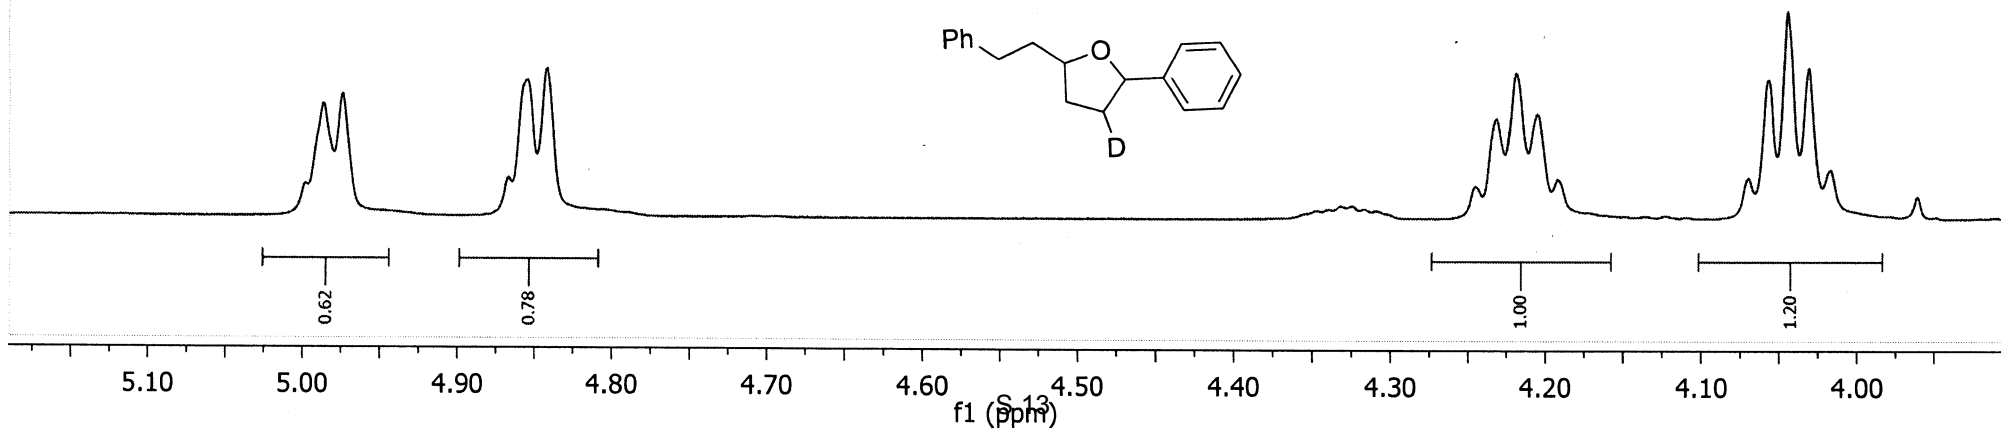

zc2-172

File: zc2-172

Pulse Sequence: s2pu1

Solvent: cdcl3

Ambient temperature

Operator: falck

File: zc2-172

INOVA-500 "fire2.swmed.edu"

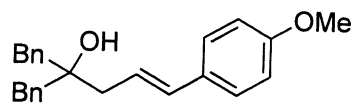

Relax. delay 1.000 sec

Pulse 45.0 degrees

Acq. time 2.049 sec

Width 8000.0 Hz

8 repetitions

OBSERVE H1, 499.7779208 MHz

DATA PROCESSING

Line broadening 0.2 Hz

FT size 65536

Total time 0 min, 30 sec

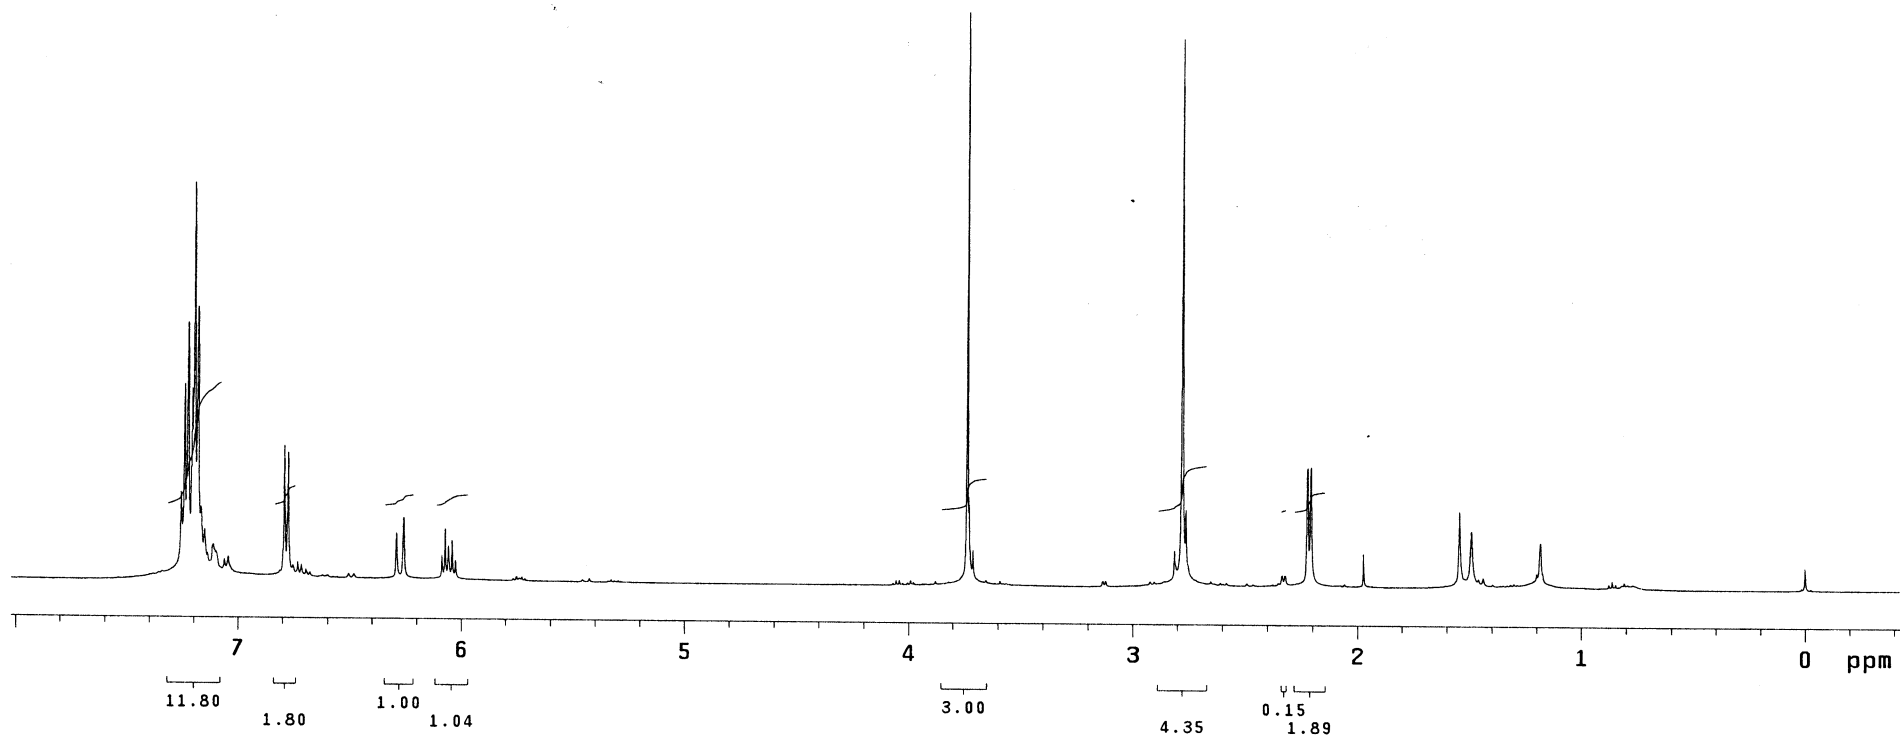

zc2-172

File: zc2-172carbon

Pulse Sequence: s2pul

Solvent: cdcl3

Ambient temperature

Operator: falck

File: zc2-172carbon

INNOVA-500 "fire2.swmed.edu"

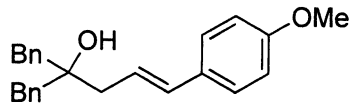

Relax. delay 1.000 sec  
Pulse 45.0 degrees  
Acq. time 1.300 sec  
Width 30165.9 Hz  
2096 repetitions  
OBSERVE C13, 125.6692167 MHz  
DECOUPLE H1, 499.7803743 MHz  
Power 36 dB  
continuously on  
WALTZ-16 modulated  
DATA PROCESSING  
Line broadening 0.5 Hz  
FT size 131072  
Total time 6 hr, 24 min, 53 sec

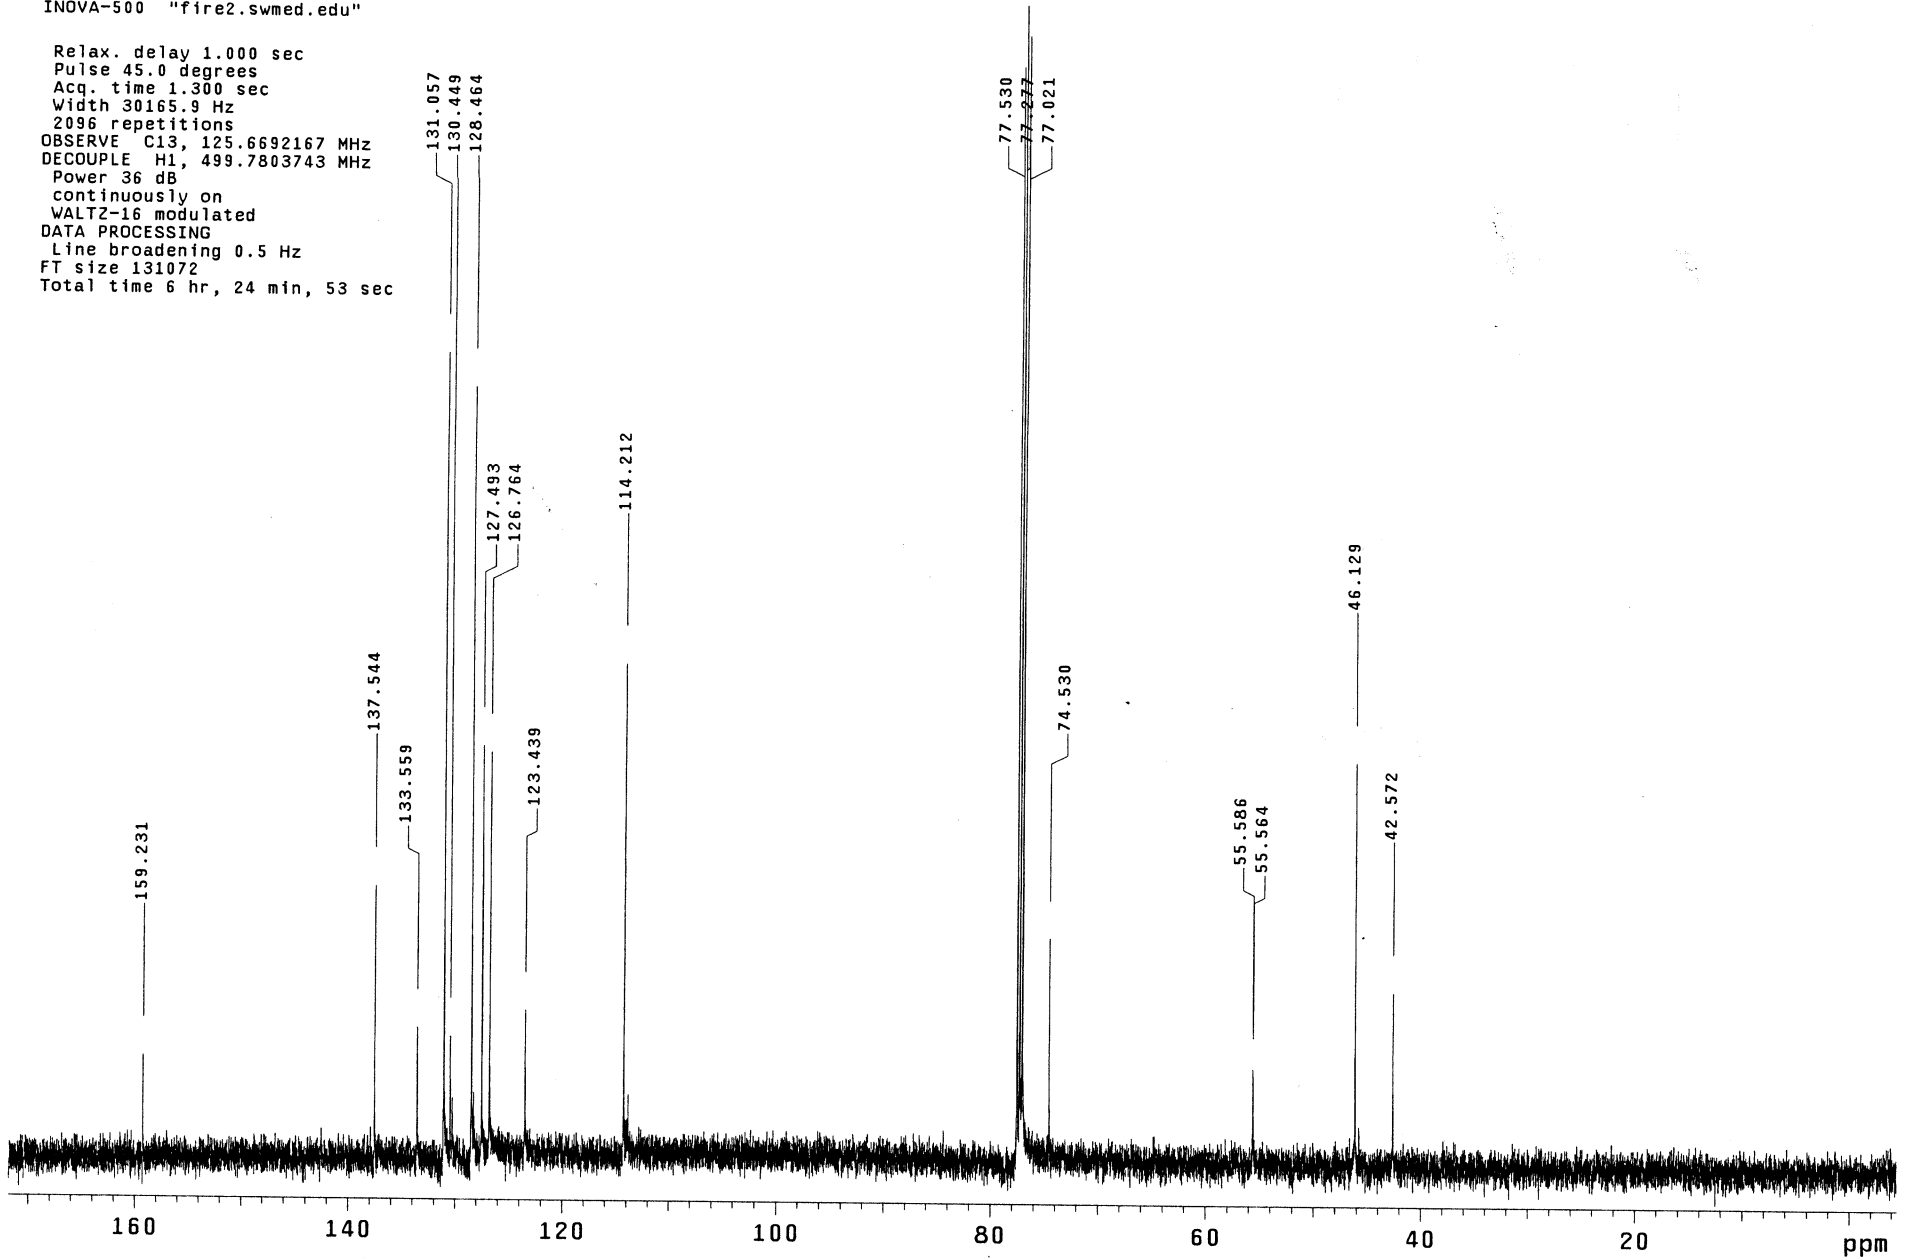

zc2-174

File: zc2-174

Pulse Sequence: s2pu1

Solvent: cdc13

Ambient temperature

Operator: falck

File: zc2-174

INOVA-500 "fire2.swmed.edu"

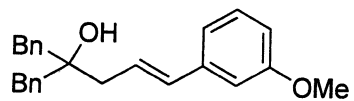

Relax. delay 1.000 sec  
Pulse 45.0 degrees  
Acq. time 2.048 sec  
Width 8000.0 Hz  
8 repetitions  
OBSERVE H1, 499.7778753 MHz  
DATA PROCESSING  
Line broadening 0.2 Hz  
FT size 65536  
Total time 0 min, 30 sec

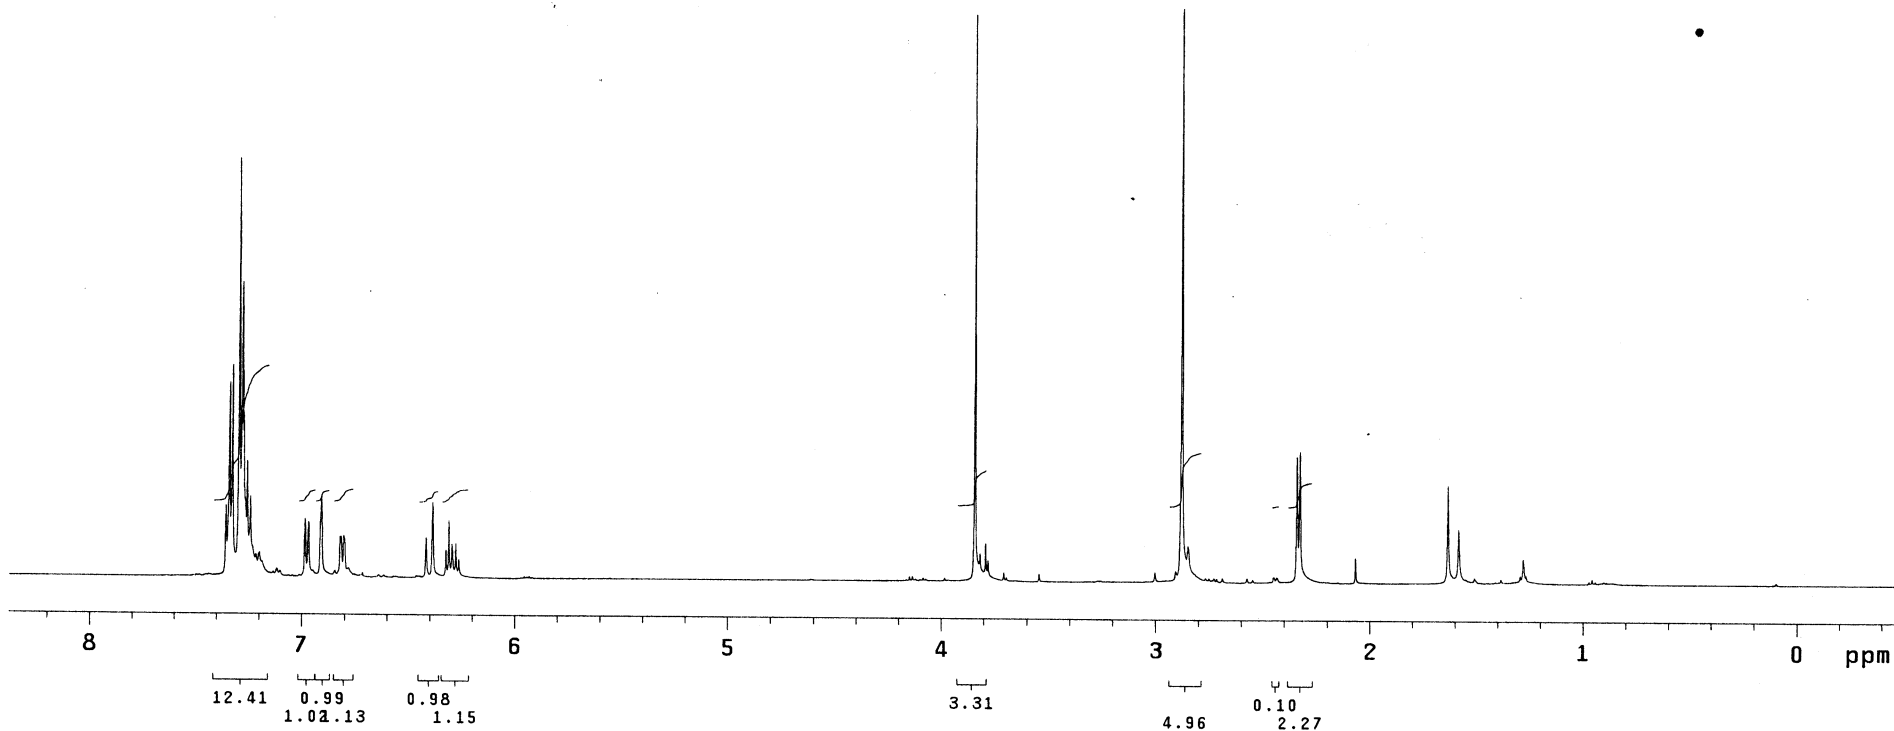



zc2-174

File: Carbon

Pulse Sequence: s2pul

Solvent: cdc13

Ambient temperature

Operator: falck

INOVA-500 "fire2.swmed.edu"

Relax. delay 1.000 sec

Pulse 45.0 degrees

Acq. time 1.300 sec

Width 30165.9 Hz

432 repetitions

OBSERVE C13, 125.6692167 MHz

DECOUPLE H1, 499.7803743 MHz

Power 36 dB

continuously on

WALTZ-16 modulated

DATA PROCESSING

Line broadening 0.5 Hz

FT size 131072

Total time 6 hr, 24 min, 53 sec

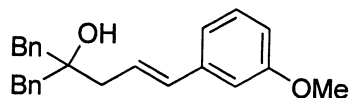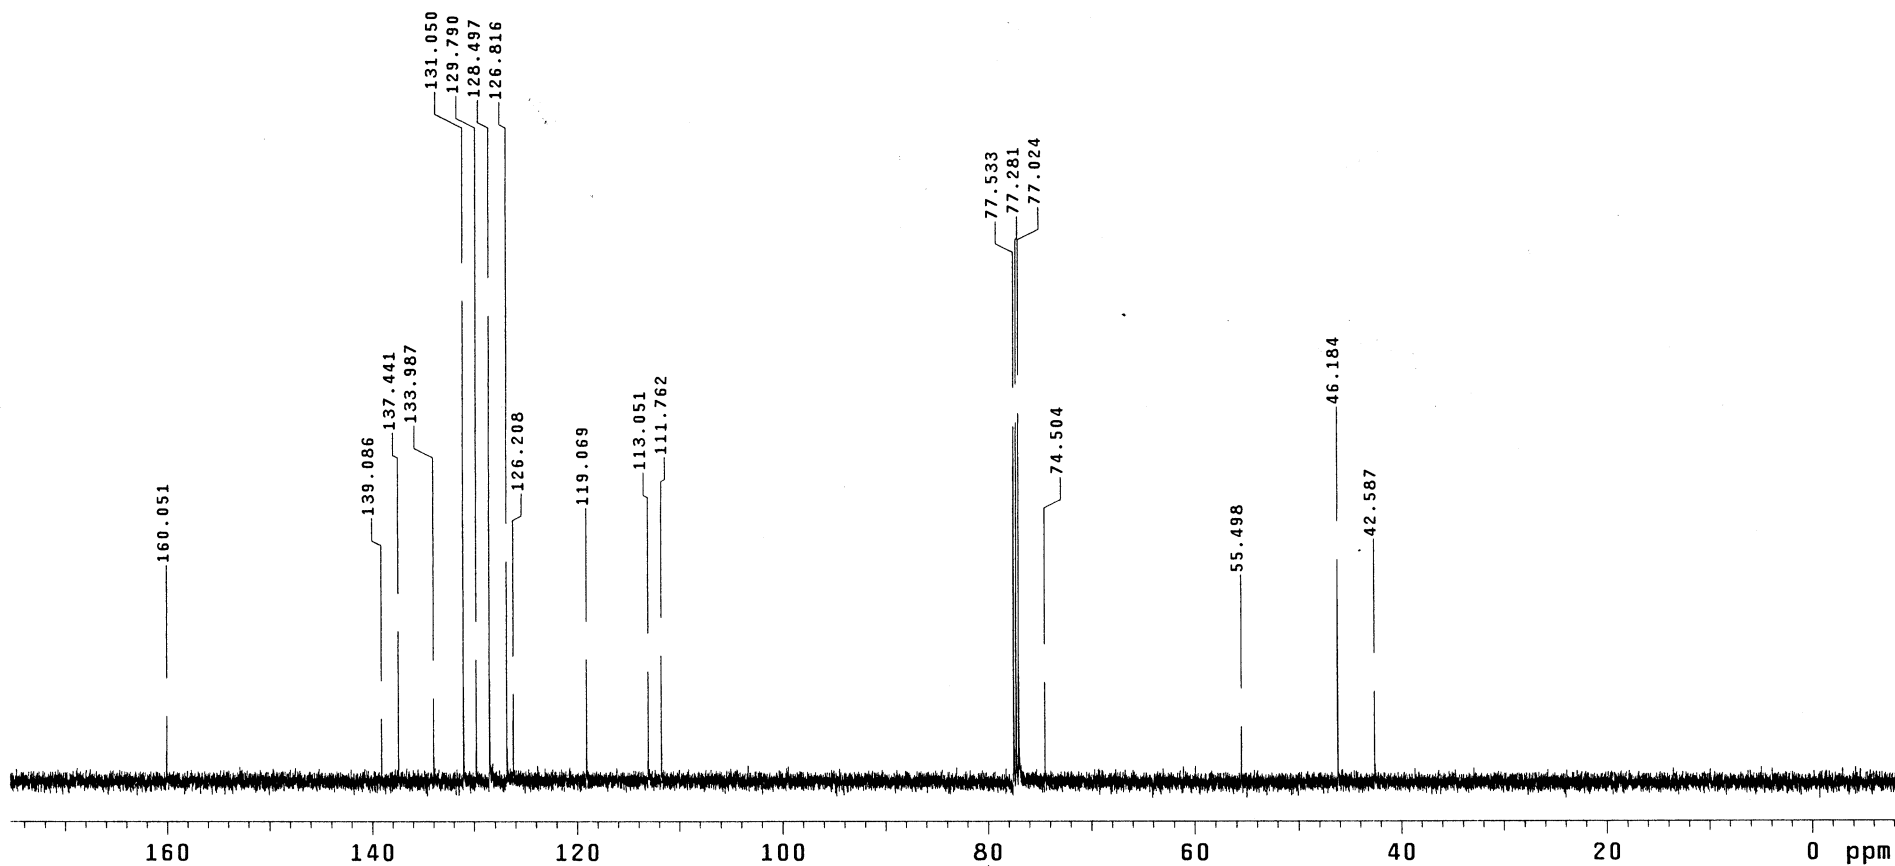

zc2-179

File: zc2-179

Pulse Sequence: s2pu1

Solvent: cdcl3

Ambient temperature

Operator: falck

File: zc2-179

INOVA-500 "fire2.swmed.edu"

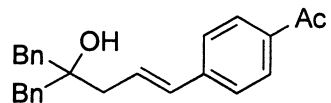

Relax. delay 1.000 sec

Pulse 45.0 degrees

Acq. time 2.048 sec

Width 8000.0 Hz

8 repetitions

OBSERVE H1, 499.7778753 MHz

DATA PROCESSING

Line broadening 0.2 Hz

FT size 65536

Total time 0 min, 30 sec

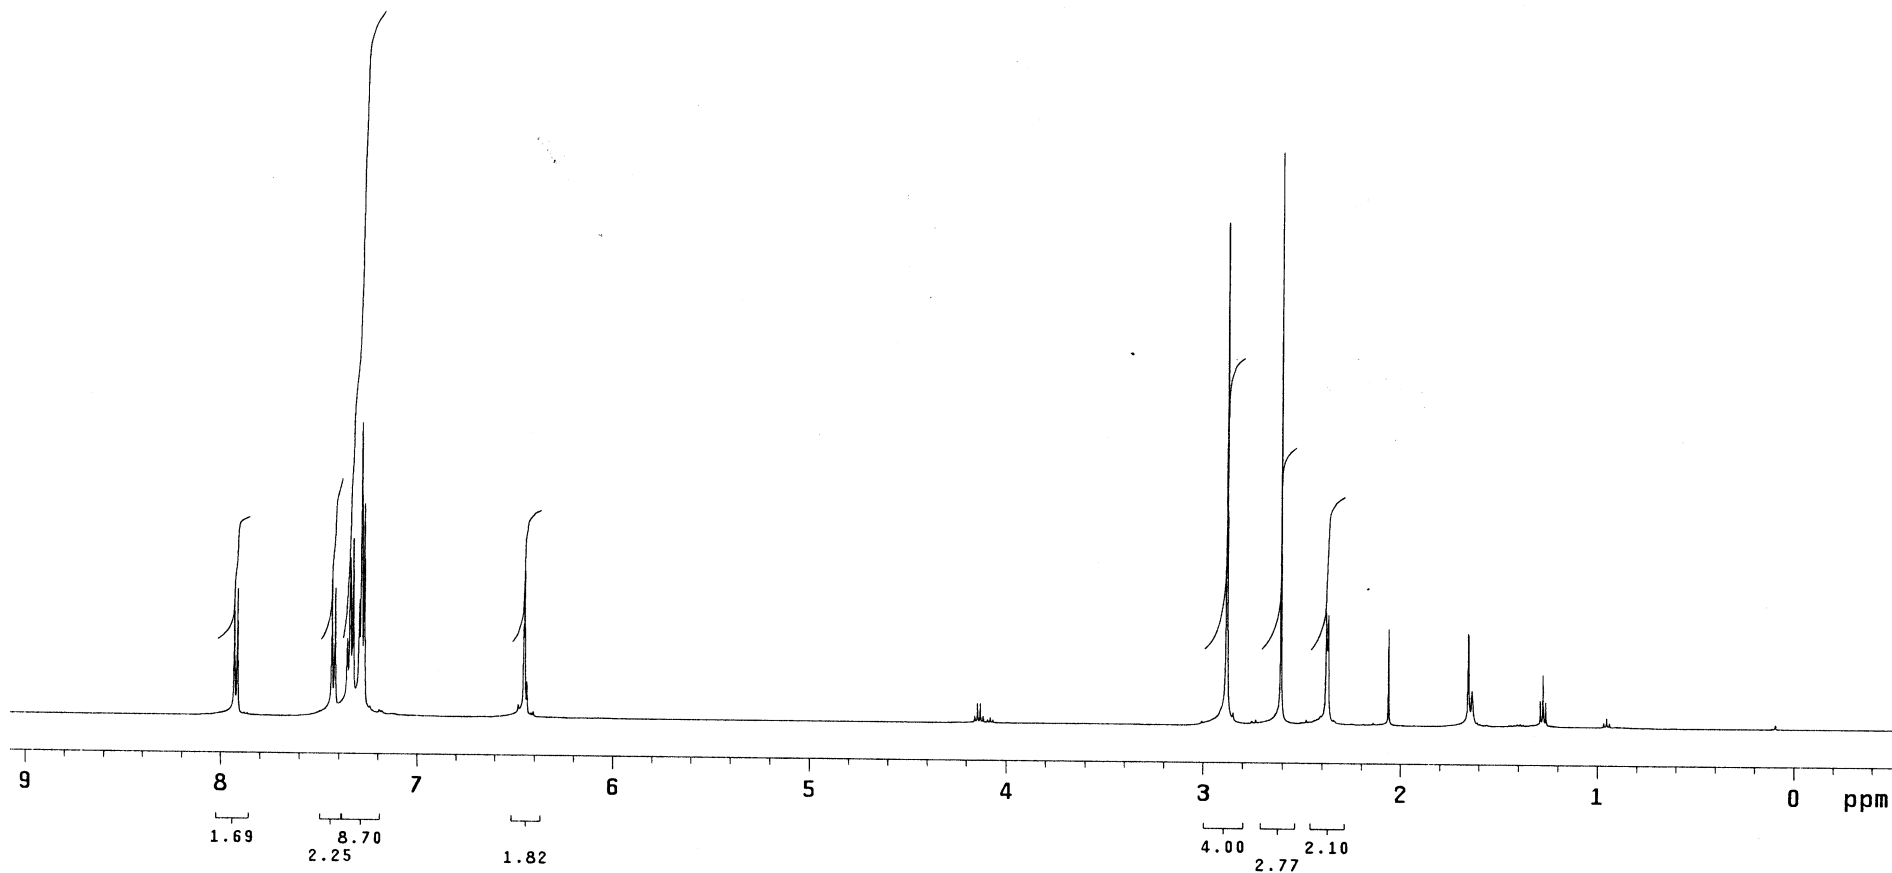

zc2-179

File: Carbon

Pulse Sequence: s2pu1

Solvent: cdc13

Ambient temperature

Operator: falck

INOVA-500 "fire2.swmed.edu"

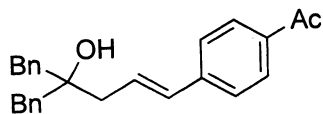

Relax. delay 1.000 sec  
Pulse 45.0 degrees  
Acq. time 1.300 sec  
Width 30165.9 Hz  
320 repetitions  
OBSERVE C13, 125.6692167 MHz  
DECOUPLE H1, 499.7803743 MHz  
Power 36 dB  
continuously on  
WALTZ-16 modulated  
DATA PROCESSING  
Line broadening 0.5 Hz  
FT size 131072  
Total time 6 hr, 24 min, 53 sec

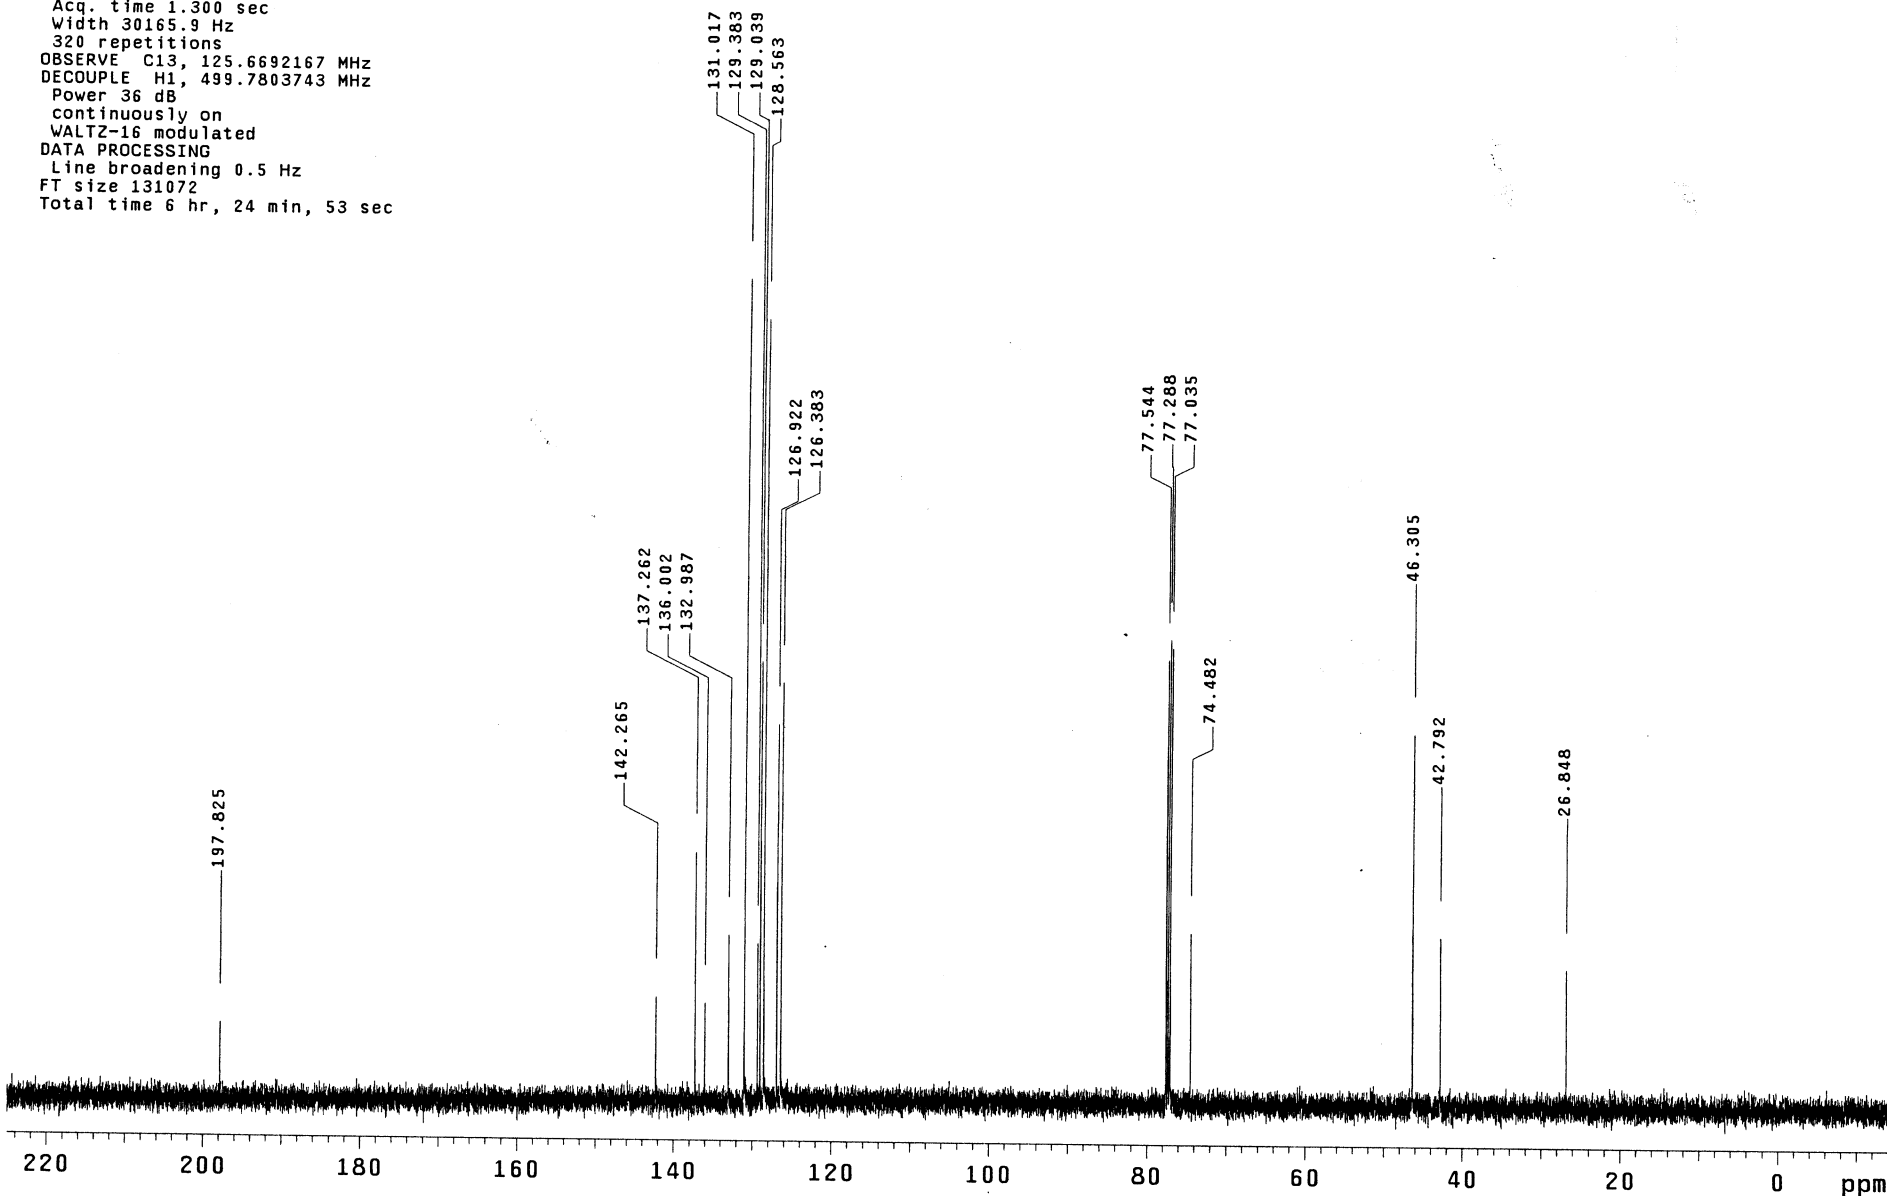

zc2-178

File: zc2-178

Pulse Sequence: s2pu1

Solvent: cdcl3

Ambient temperature

Operator: falck

File: zc2-178

INOVA-500 "fire2.swmed.edu"

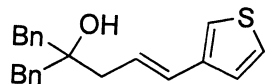

Relax. delay 1.000 sec  
Pulse 45.0 degrees  
Acq. time 2.049 sec  
Width 8000.0 Hz  
8 repetitions  
OBSERVE H1, 499.7778753 MHz  
DATA PROCESSING  
Line broadening 0.2 Hz  
FT size 65536  
Total time 0 min, 30 sec

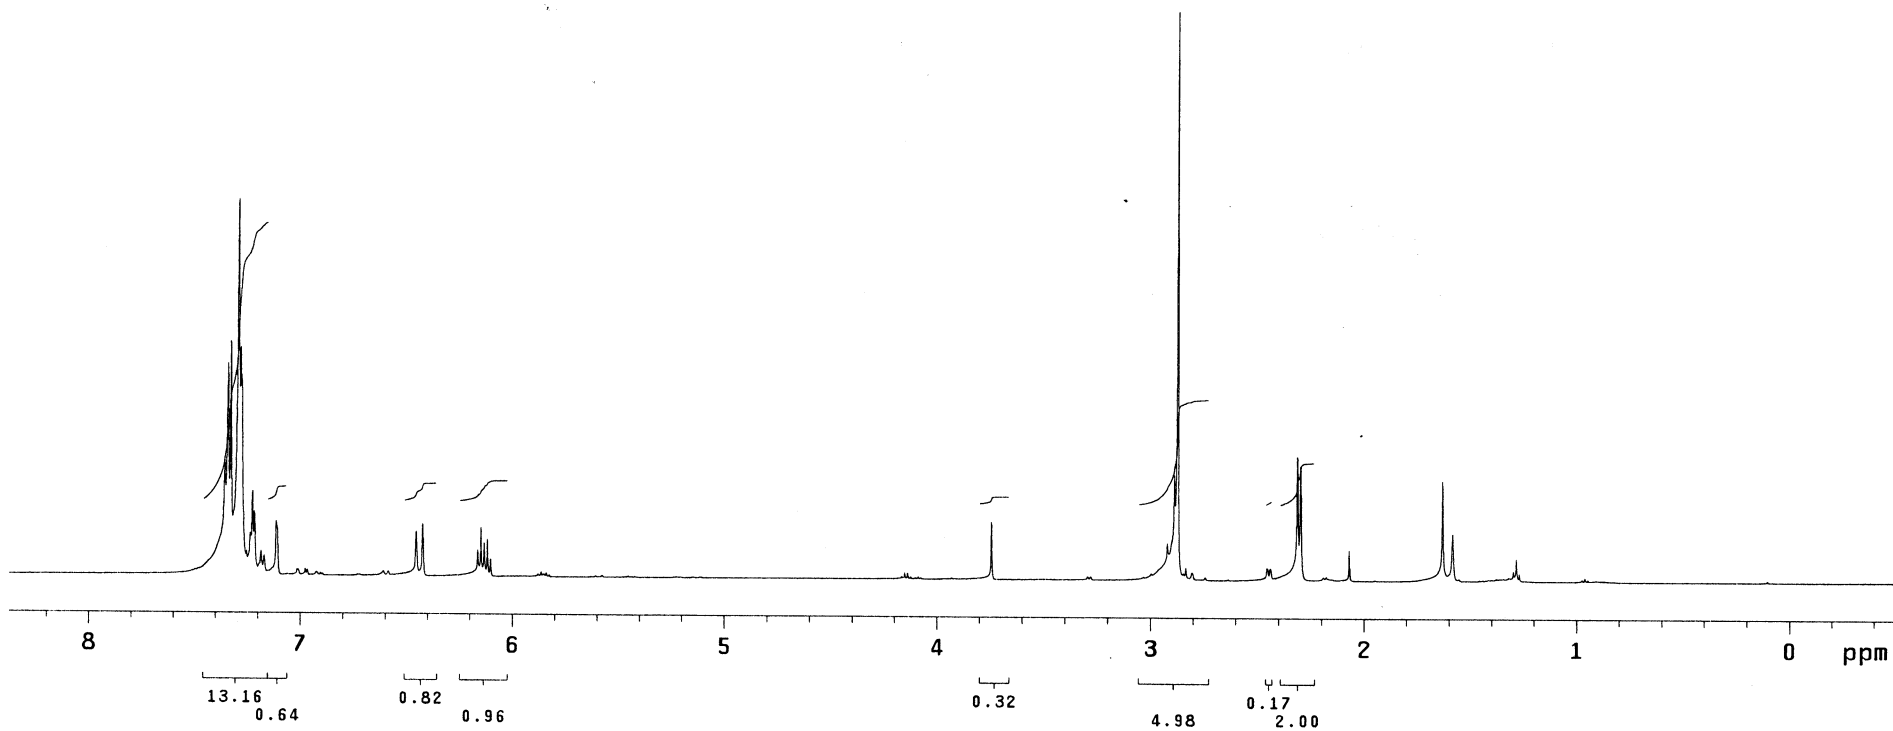

zc2-178

File: Carbon

Pulse Sequence: s2pul

Solvent: cdc13

Ambient temperature

Operator: falck

INOVA-500 "fire2.swmed.edu"

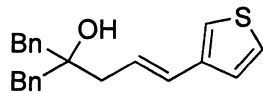

Relax. delay 1.000 sec  
Pulse 45.0 degrees  
Acq. time 1.300 sec  
Width 30165.9 Hz  
208 repetitions  
OBSERVE C13, 125.6692167 MHz  
DECOUPLE H1, 499.7803743 MHz  
Power 36 dB  
continuously on  
WALTZ-16 modulated  
DATA PROCESSING  
Line broadening 0.5 Hz  
FT size 131072  
Total time 6 hr, 24 sec

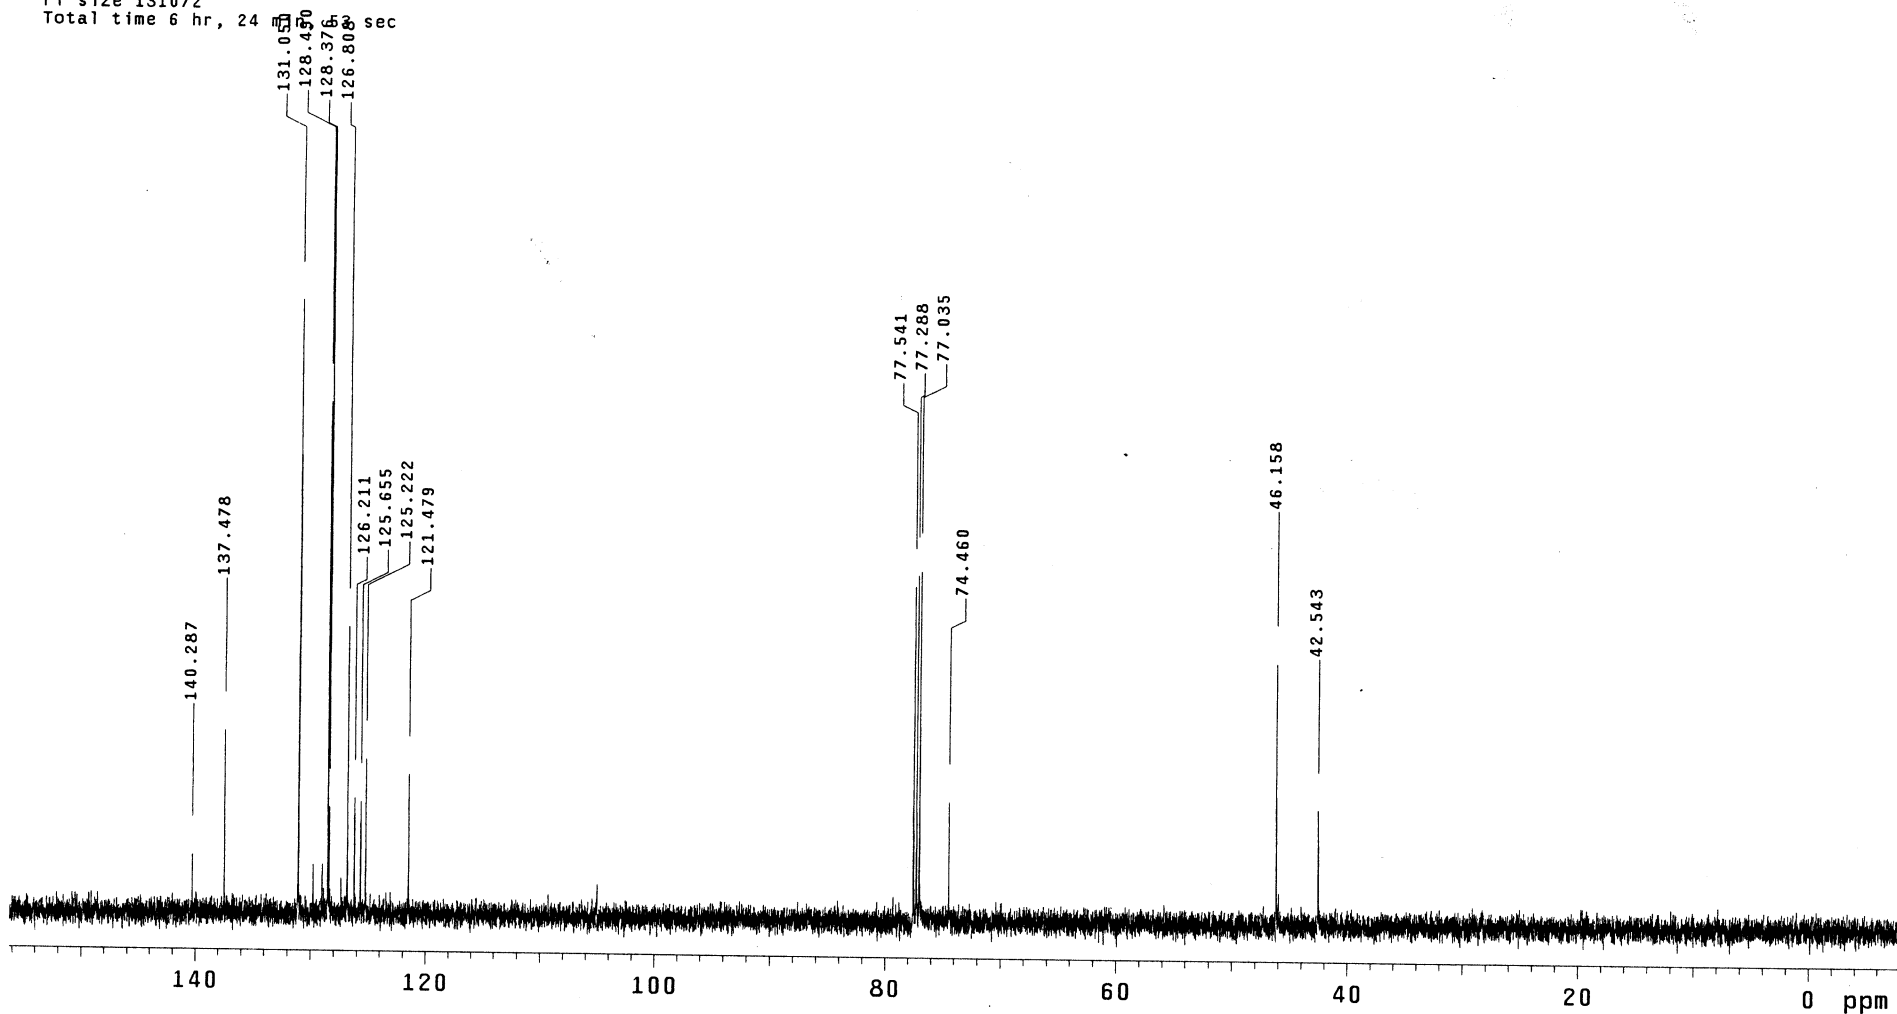

zc2-195a

File: Proton

Pulse Sequence: s2pu1

Solvent: cdcl3

Ambient temperature

Operator: falck

INOVA-500 "fire2.swmed.edu"

Relax. delay 1.000 sec

Pulse 45.0 degrees

Acq. time 2.048 sec

Width 8000.0 Hz

8 repetitions

OBSERVE H1, 499.7778753 MHz

DATA PROCESSING

Line broadening 0.2 Hz

FT size 65536

Total time 0 min, 30 sec

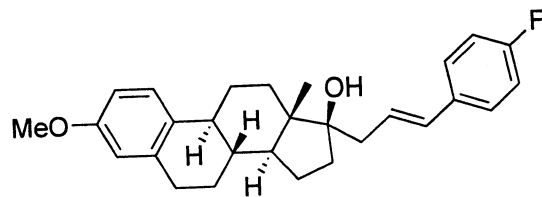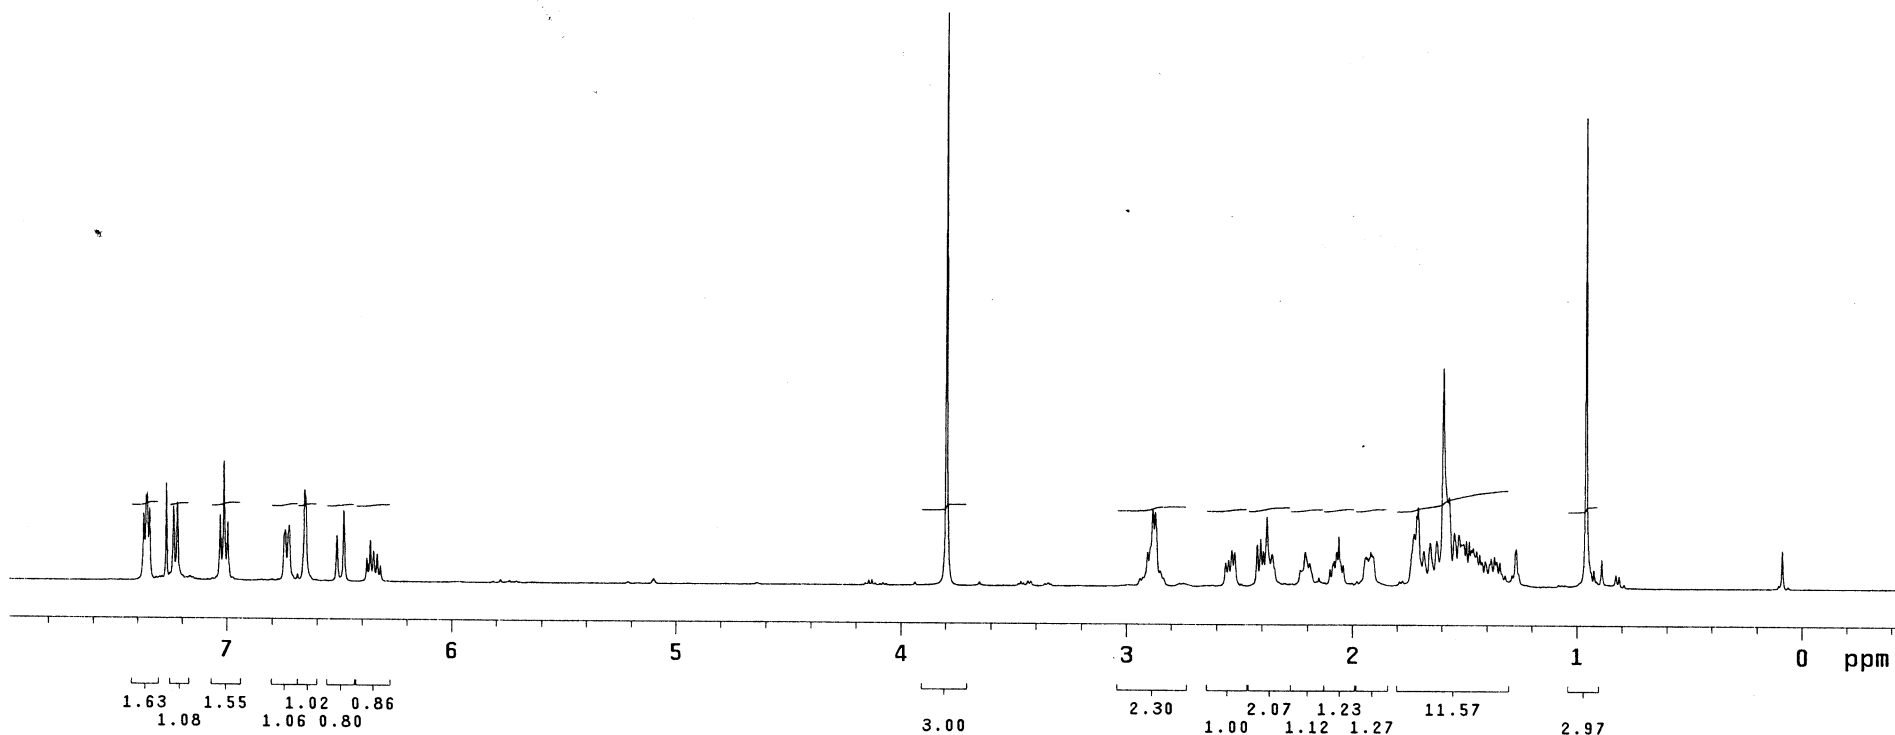

zc2-195a

File: Carbon

Pulse Sequence: s2pu1

Solvent: cdcl3

Ambient temperature

Operator: falck

INOVA-500 "fire2.swmed.edu"

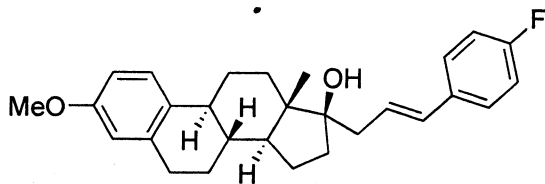

Relax. delay 1.000 sec  
Pulse 45.0 degrees  
Acq. time 1.300 sec  
Width 30165.9 Hz  
2776 repetitions  
OBSERVE C13, 125.6692167 MHz  
DECOUPLE H1, 499.7803743 MHz  
Power 36 dB  
continuously on  
WALTZ-16 modulated  
DATA PROCESSING  
Line broadening 0.5 Hz  
FT size 131072  
Total time 6 hr, 24 min, 53 sec

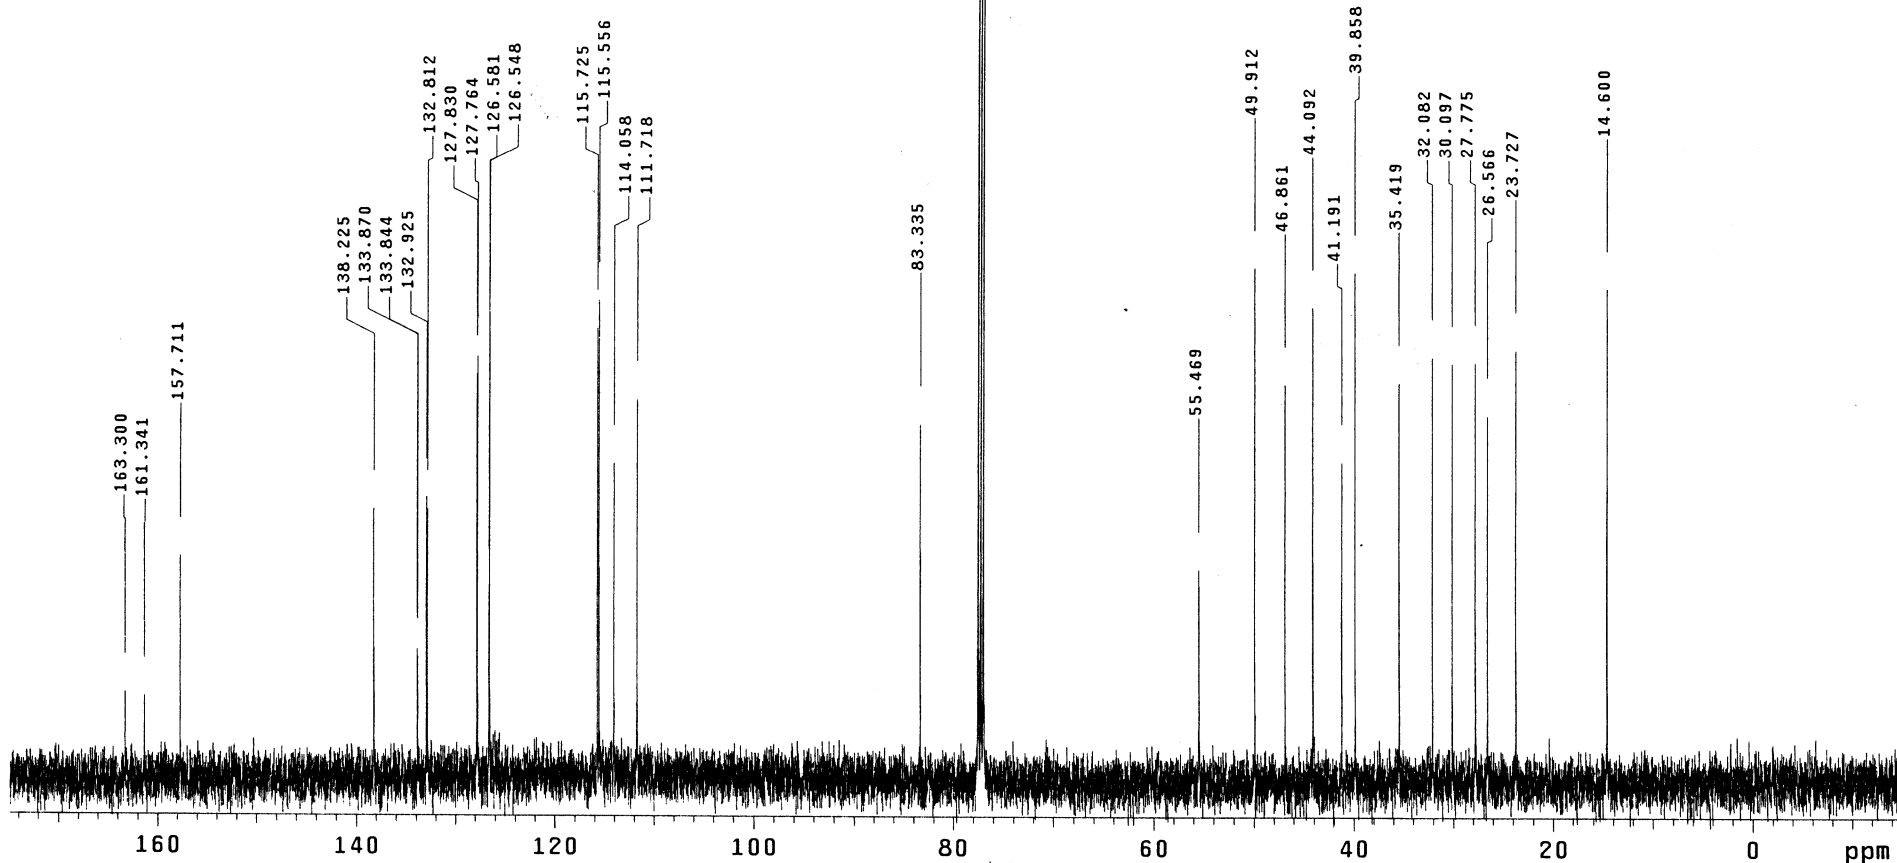

zc2-111

File: Proton

Pulse Sequence: s2pu1

Solvent: cdc13

Temp: 19.0 C / 292.1 K

Operator: falck

INOVA-400 "pele400"

Relax. delay 1.000 sec

Pulse 45.0 degrees

Acq. time 2.049 sec

Width 6396.4 Hz

8 repetitions

OBSERVE H1, 399.7793055 MHz

DATA PROCESSING

Line broadening 0.2 Hz

FT size 65536

Total time 0 min, 30 sec

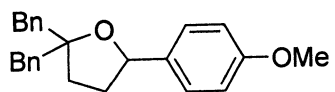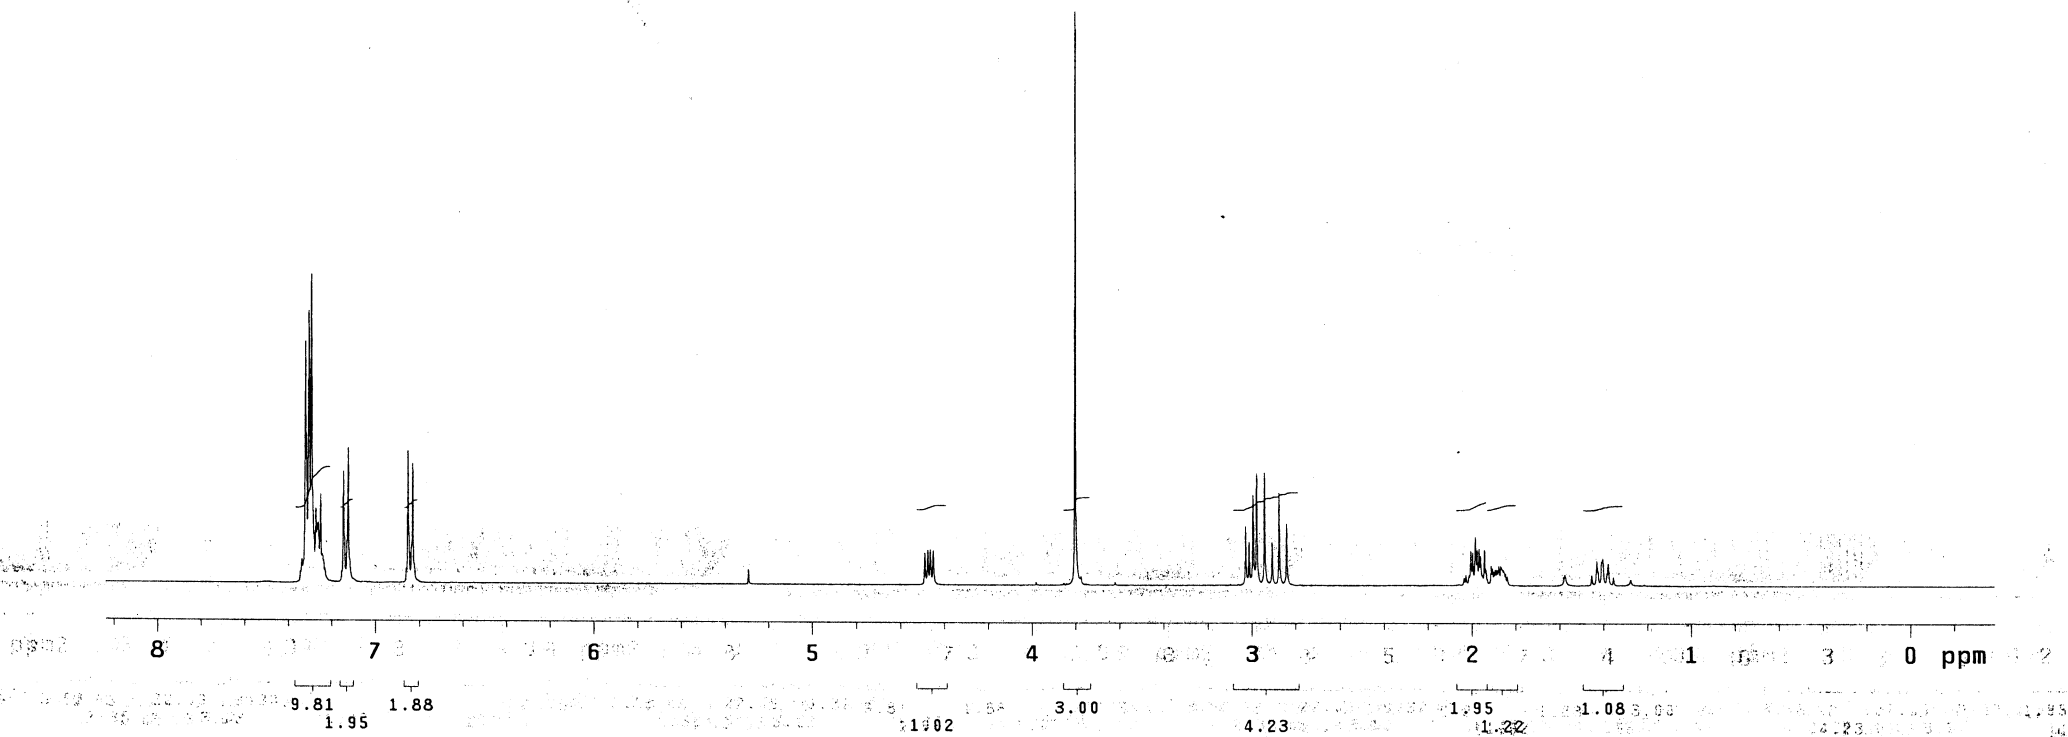



zc2-111

File: Carbon

Pulse Sequence: s2pu1

Solvent: cdc13  
Temp. 19.0 C / 292.1 K  
Operator: falck  
INOVA-400 "pele400"

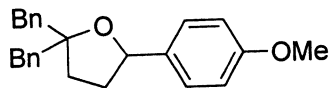

Relax. delay 1.000 sec  
Pulse 45.0 degrees  
Acq. time 1.300 sec  
Width 24125.5 Hz  
176 repetitions  
OBSERVE C13, 100.5245623 MHz  
DECOUPLE H1, 399.7813047 MHz  
Power 40 dB  
continuously on  
WALTZ-16 modulated  
DATA PROCESSING  
Line broadening 0.5 Hz  
FT size 65536  
Total time 38 min, 29 sec

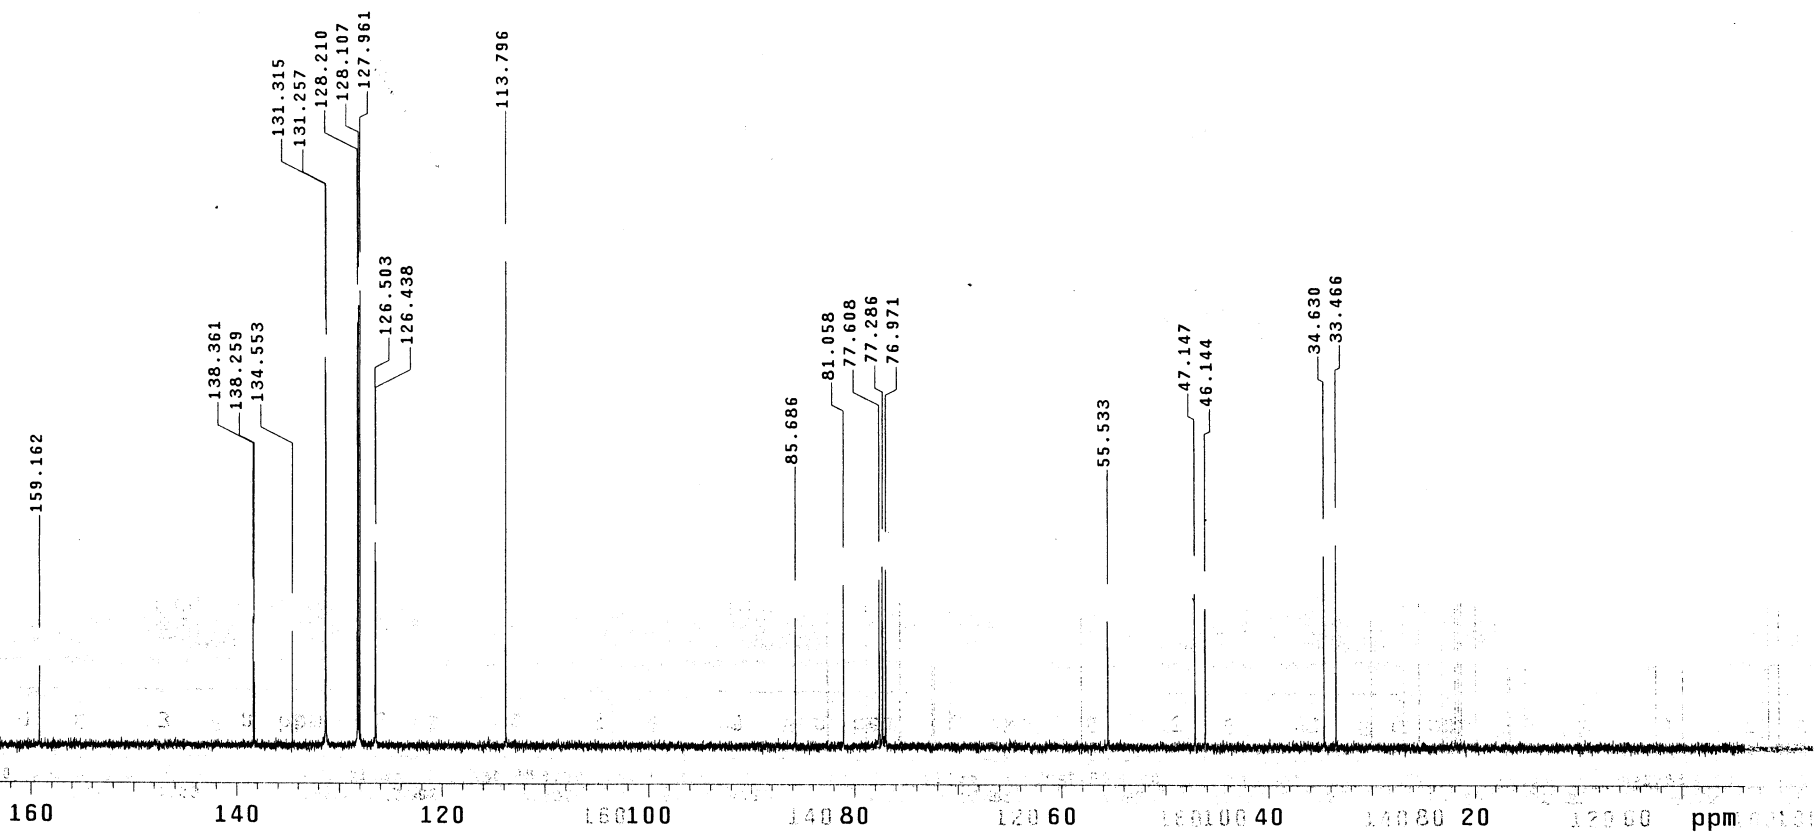

zc2-90b

File: zc2-90b

Pulse Sequence: s2pu1

Solvent: cdcl3

Ambient temperature

Operator: falck

File: zc2-90b

INOVA-500 "fire2.swmed.edu"

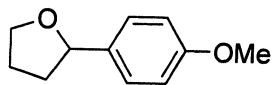

Relax. delay 1.000 sec  
Pulse 45.0 degrees  
Acq. time 2.048 sec  
Width 8000.0 Hz  
16 repetitions  
OBSERVE H1, 499.7779159 MHz  
DATA PROCESSING  
Line broadening 0.2 Hz  
FT size 65536  
Total time 0 min, 55 sec

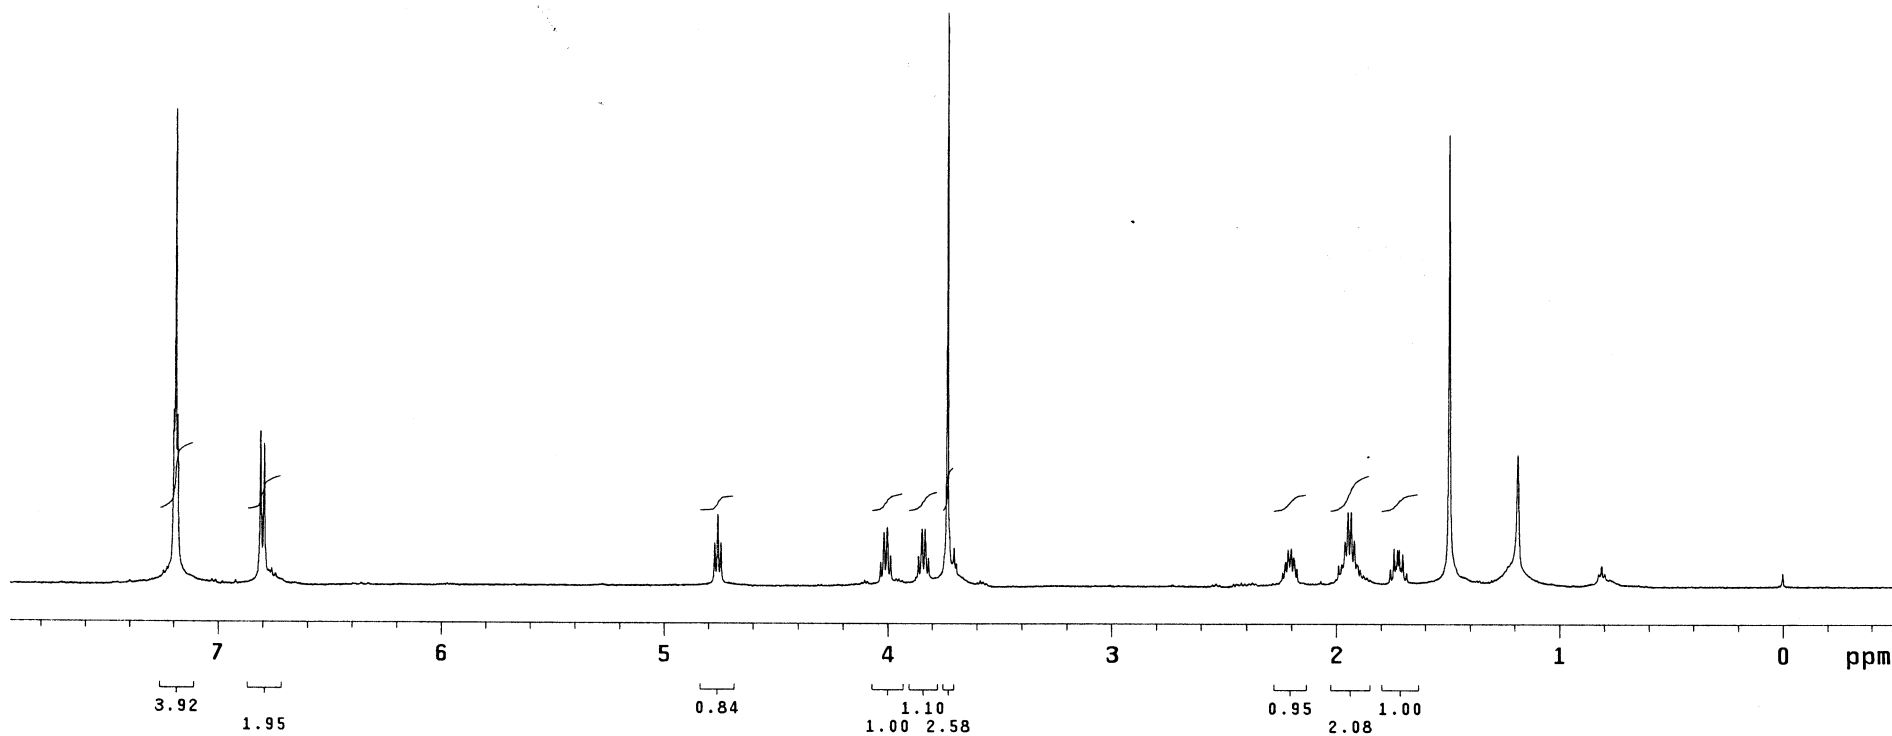

zc2-121

File: Proton

Pulse Sequence: s2pu1

Solvent: cdc13

Ambient temperature

Operator: falck

INOVA-500 "fire2.swmed.edu"

Relax. delay 1.000 sec

Pulse 45.0 degrees

Acq. time 2.048 sec

Width 8000.0 Hz

16 repetitions

OBSERVE H1, 499.7778753 MHz

DATA PROCESSING

Line broadening 0.2 Hz

FT size 65536

Total time 0 min, 55 sec

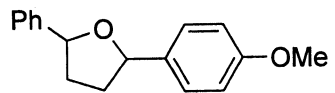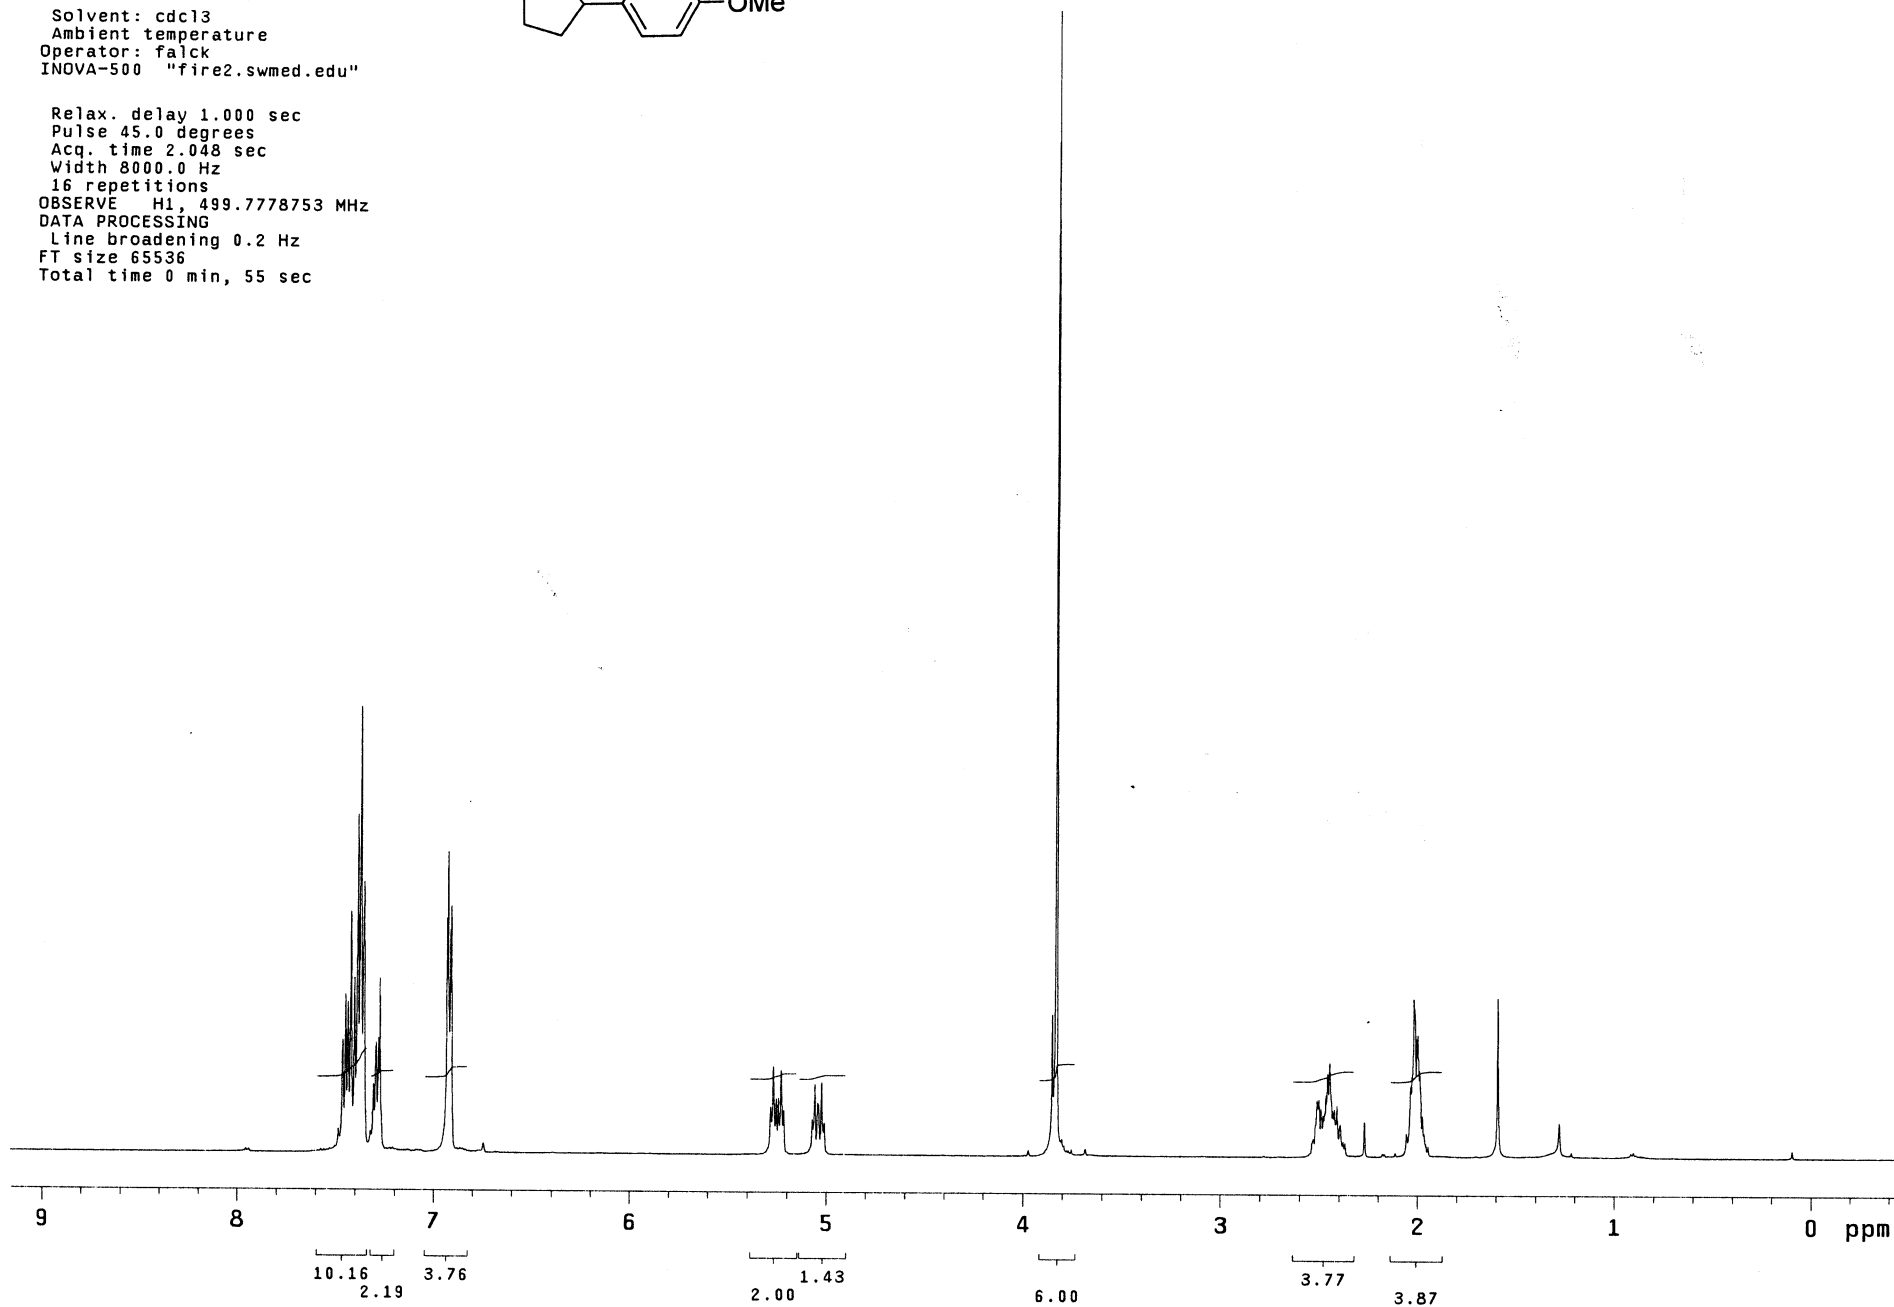

zc2-127

File: Carbon

Pulse Sequence: s2pu1

Solvent: cdcl3  
Temp. 72.0 C / 345.1 K  
Operator: falck  
INOVA-500 "fire2.swmed.edu"

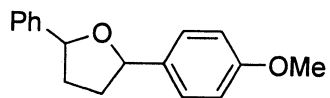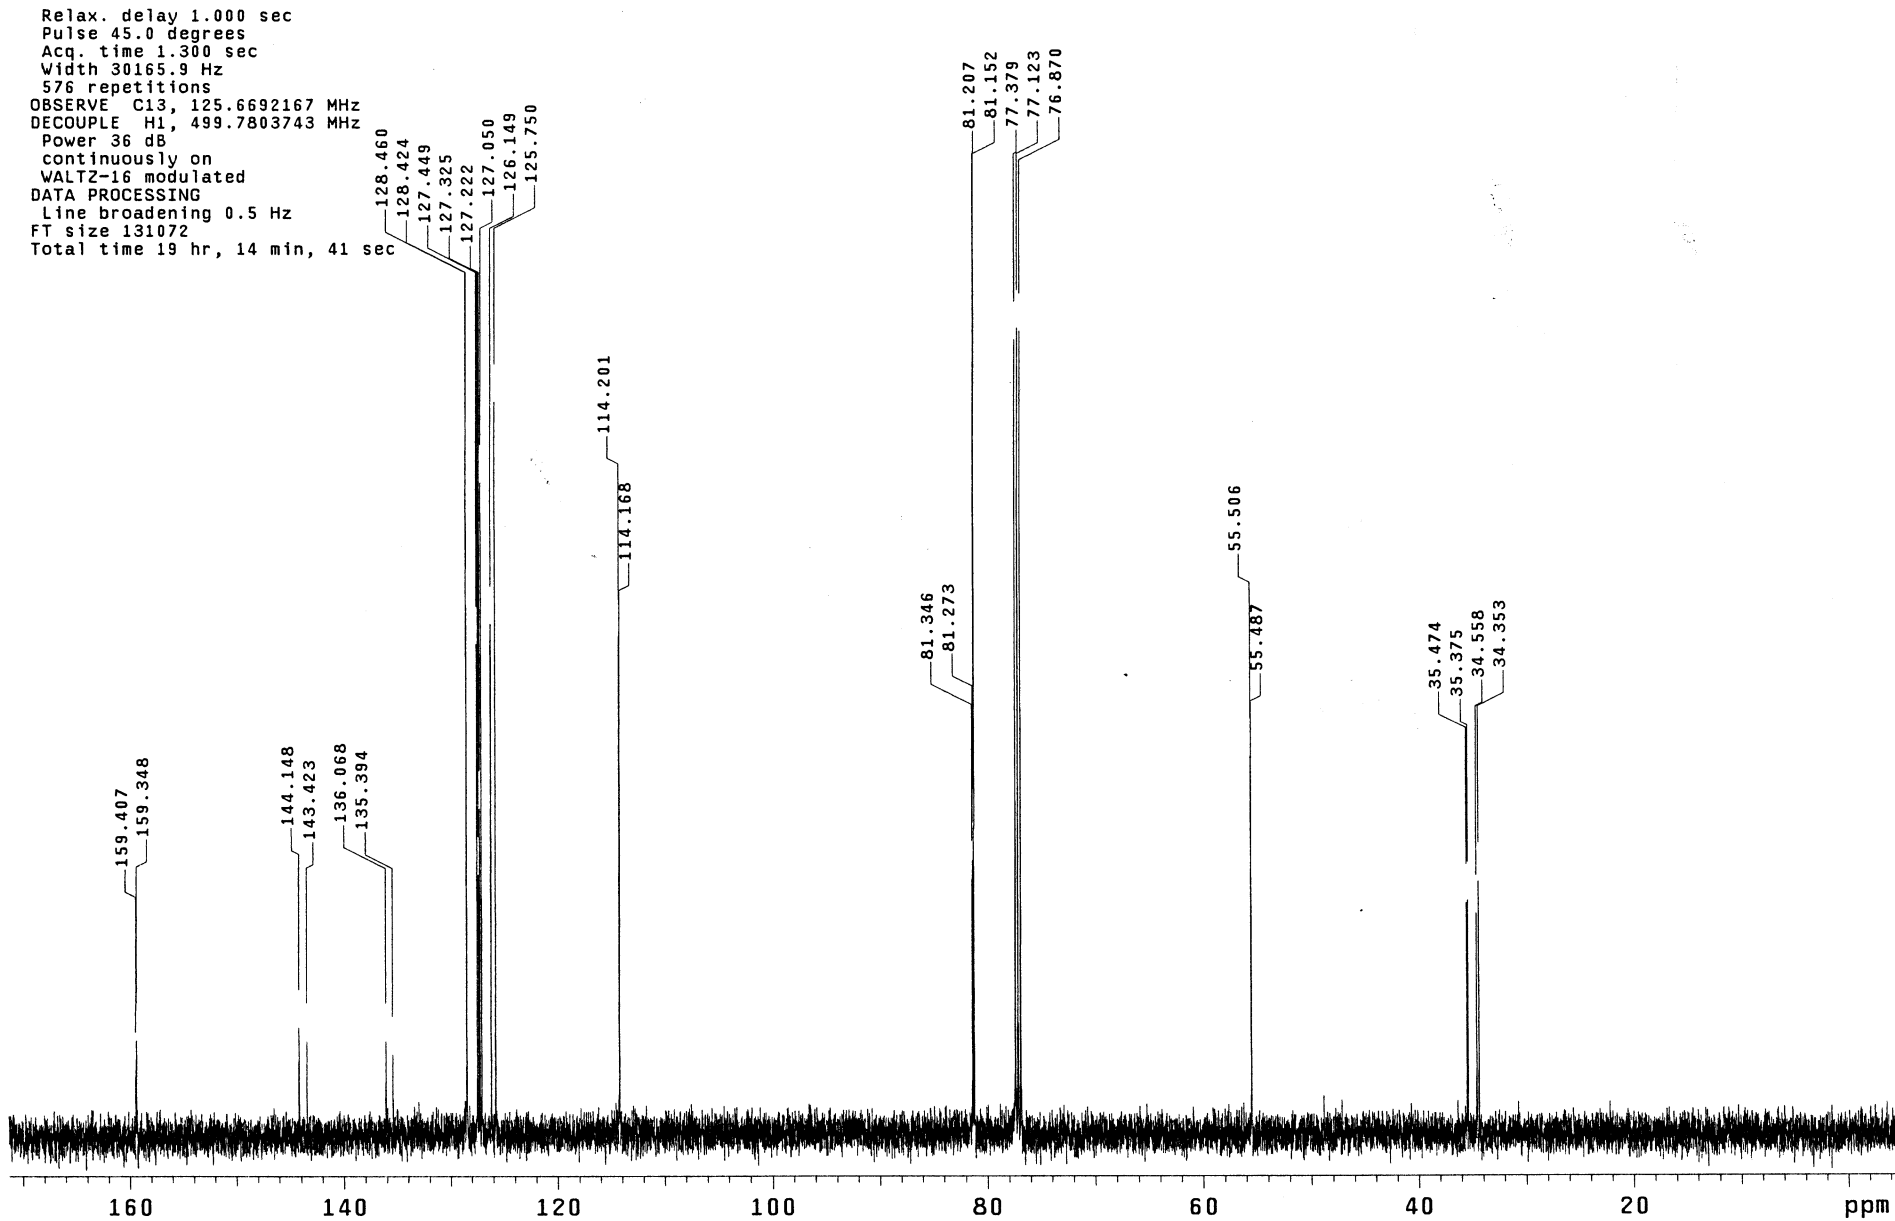

zcl-289

File: Proton  
Pulse Sequence: s2pu1  
Solvent: cdc13  
Ambient temperature  
Operator: falck  
INOVA-500 "fire2.swmed.edu"

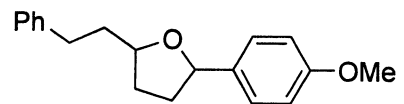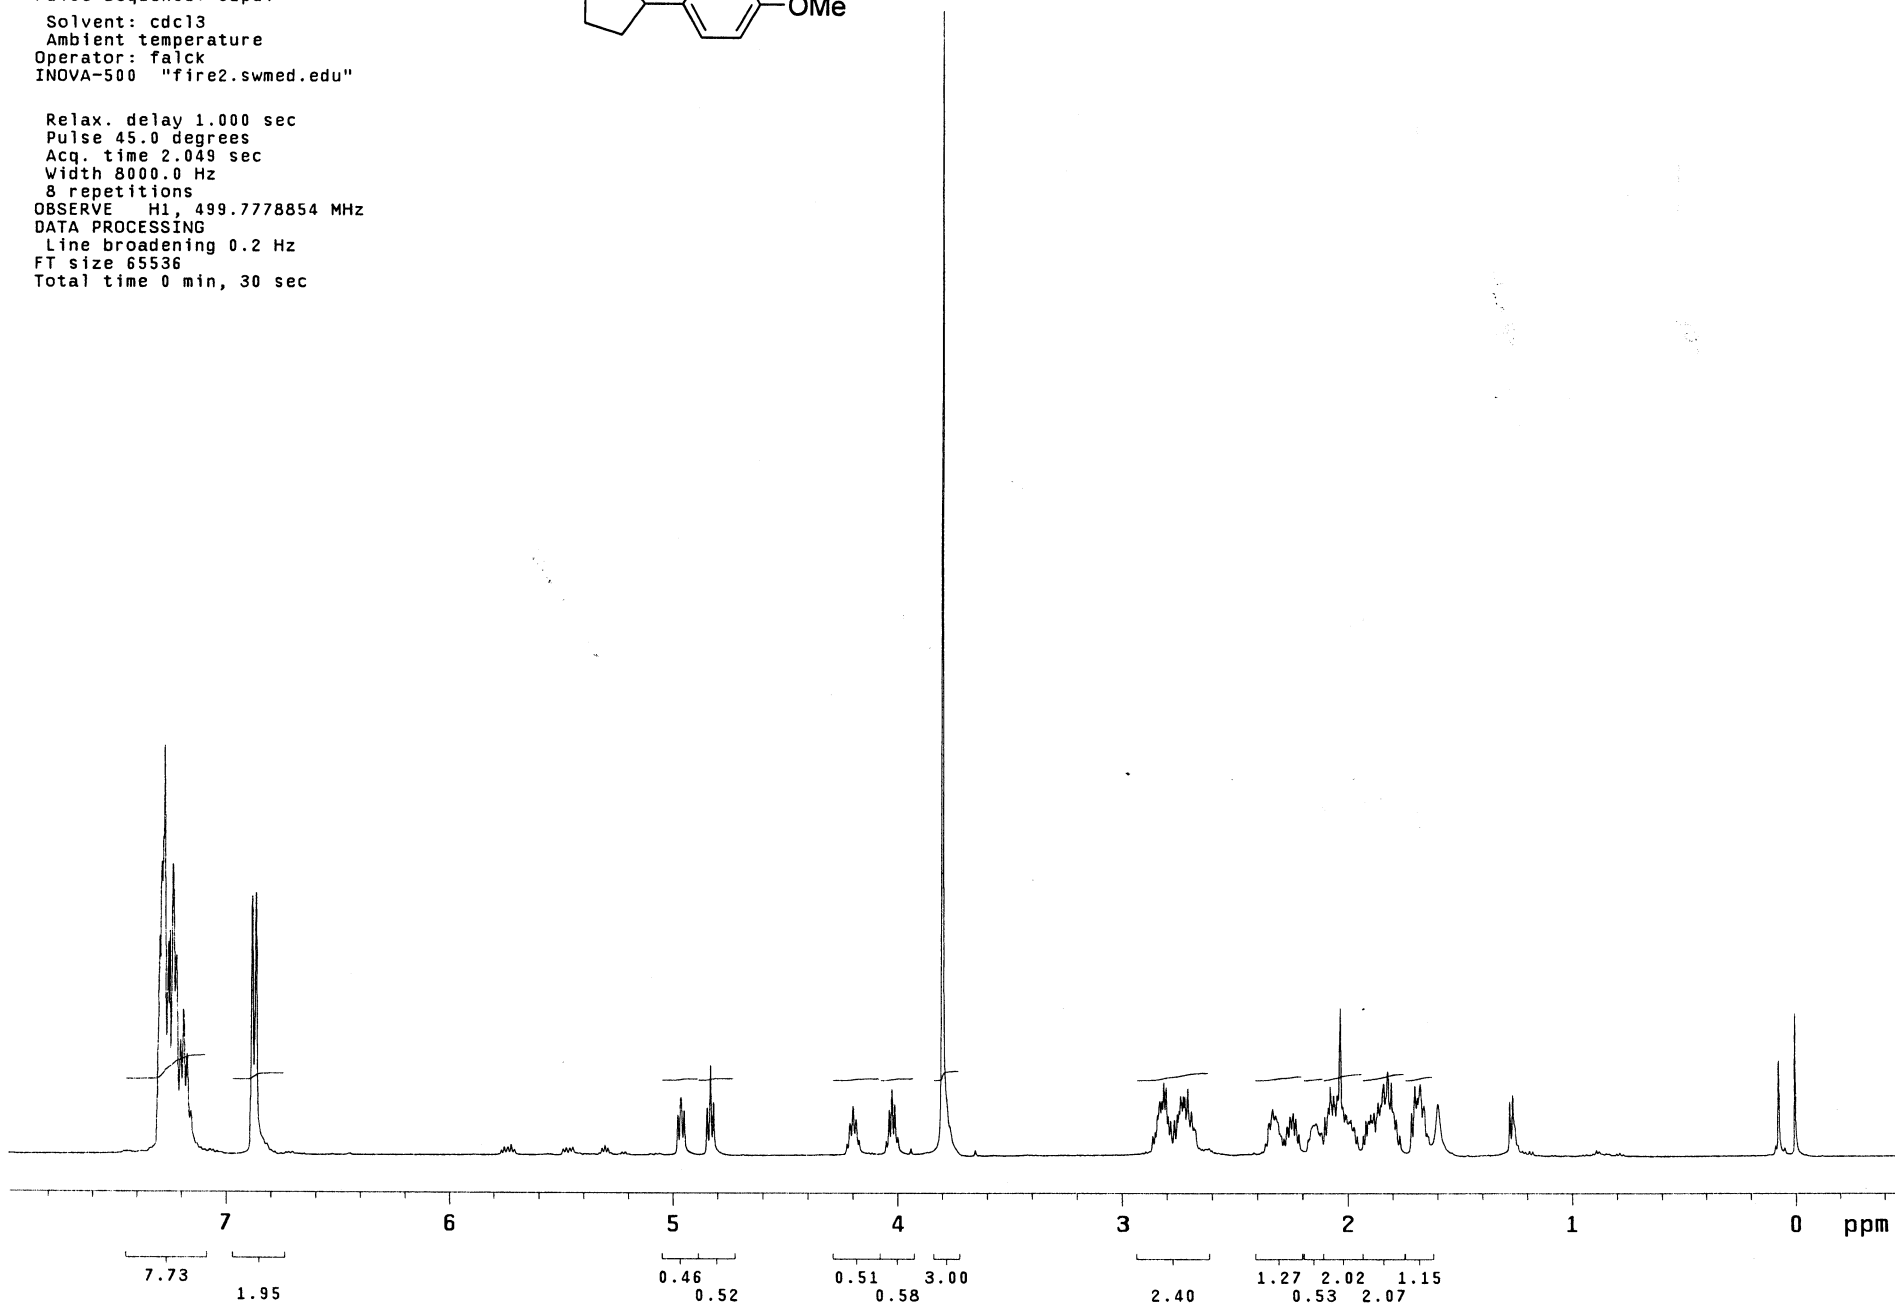

zcl-289

File: Carbon

Pulse Sequence: s2pu1

Solvent: cdcl3

Ambient temperature

Operator: falck

INOVA-500 "fire2.swmed.edu"

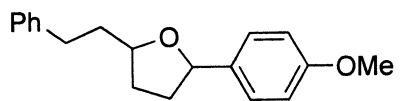

Relax. delay 1.000 sec  
Pulse 45.0 degrees  
Acq. time 1.300 sec  
Width 30165.9 Hz  
512 repetitions  
OBSERVE C13, 125.6692167 MHz  
DECOUPLE H1, 499.7803743 MHz  
Power 44 dB  
continuously on  
WALTZ-16 modulated  
DATA PROCESSING  
Line broadening 0.5 Hz  
FT size 131072  
Total time 1 hr, 16 min, 58 sec

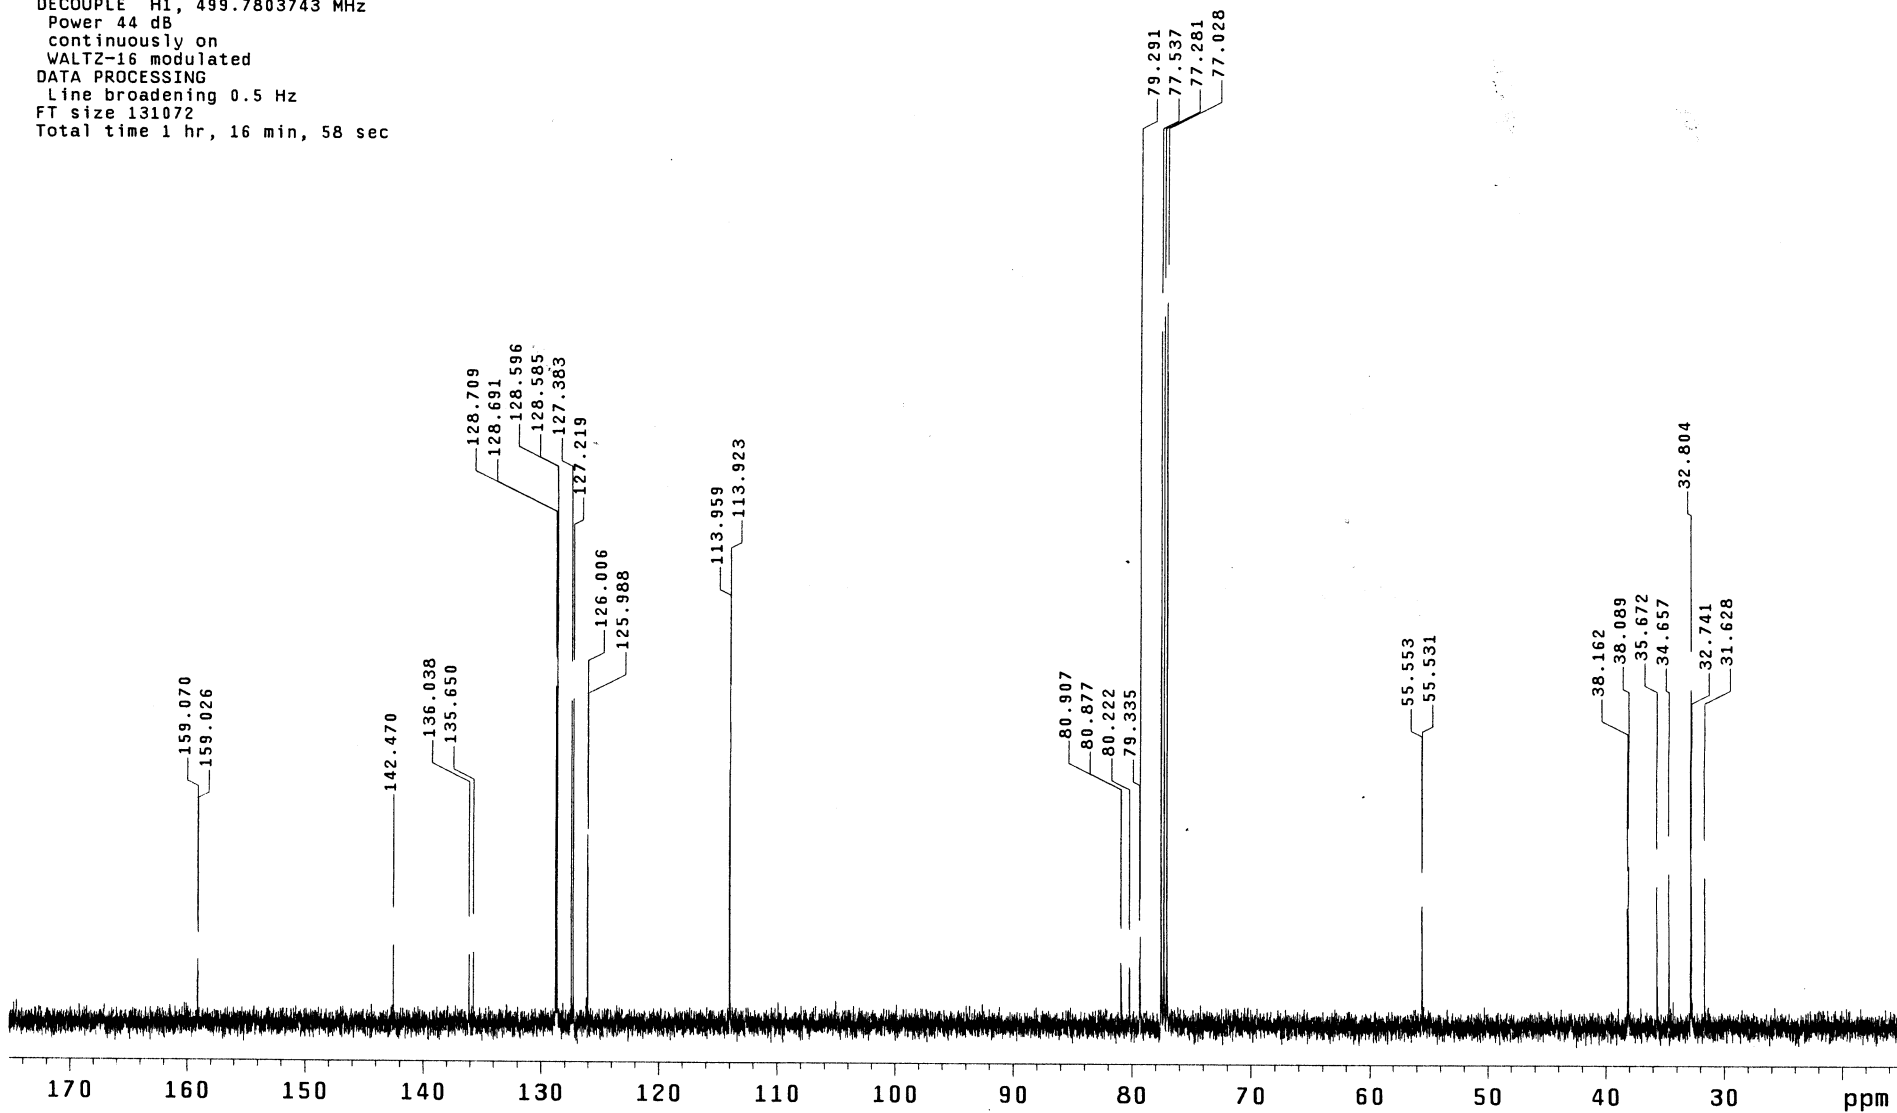

zc2-118

File: Proton

Pulse Sequence: s2pu1

Solvent: cdc13

Ambient temperature

Operator: falck

INOVA-500 "fire2.swmed.edu"

Relax. delay 1.000 sec

Pulse 45.0 degrees

Acq. time 2.049 sec

Width 8000.0 Hz

16 repetitions

OBSERVE H1, 499.7778753 MHz

DATA PROCESSING

Line broadening 0.2 Hz

FT size 65536

Total time 0 min, 55 sec

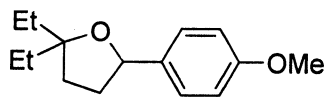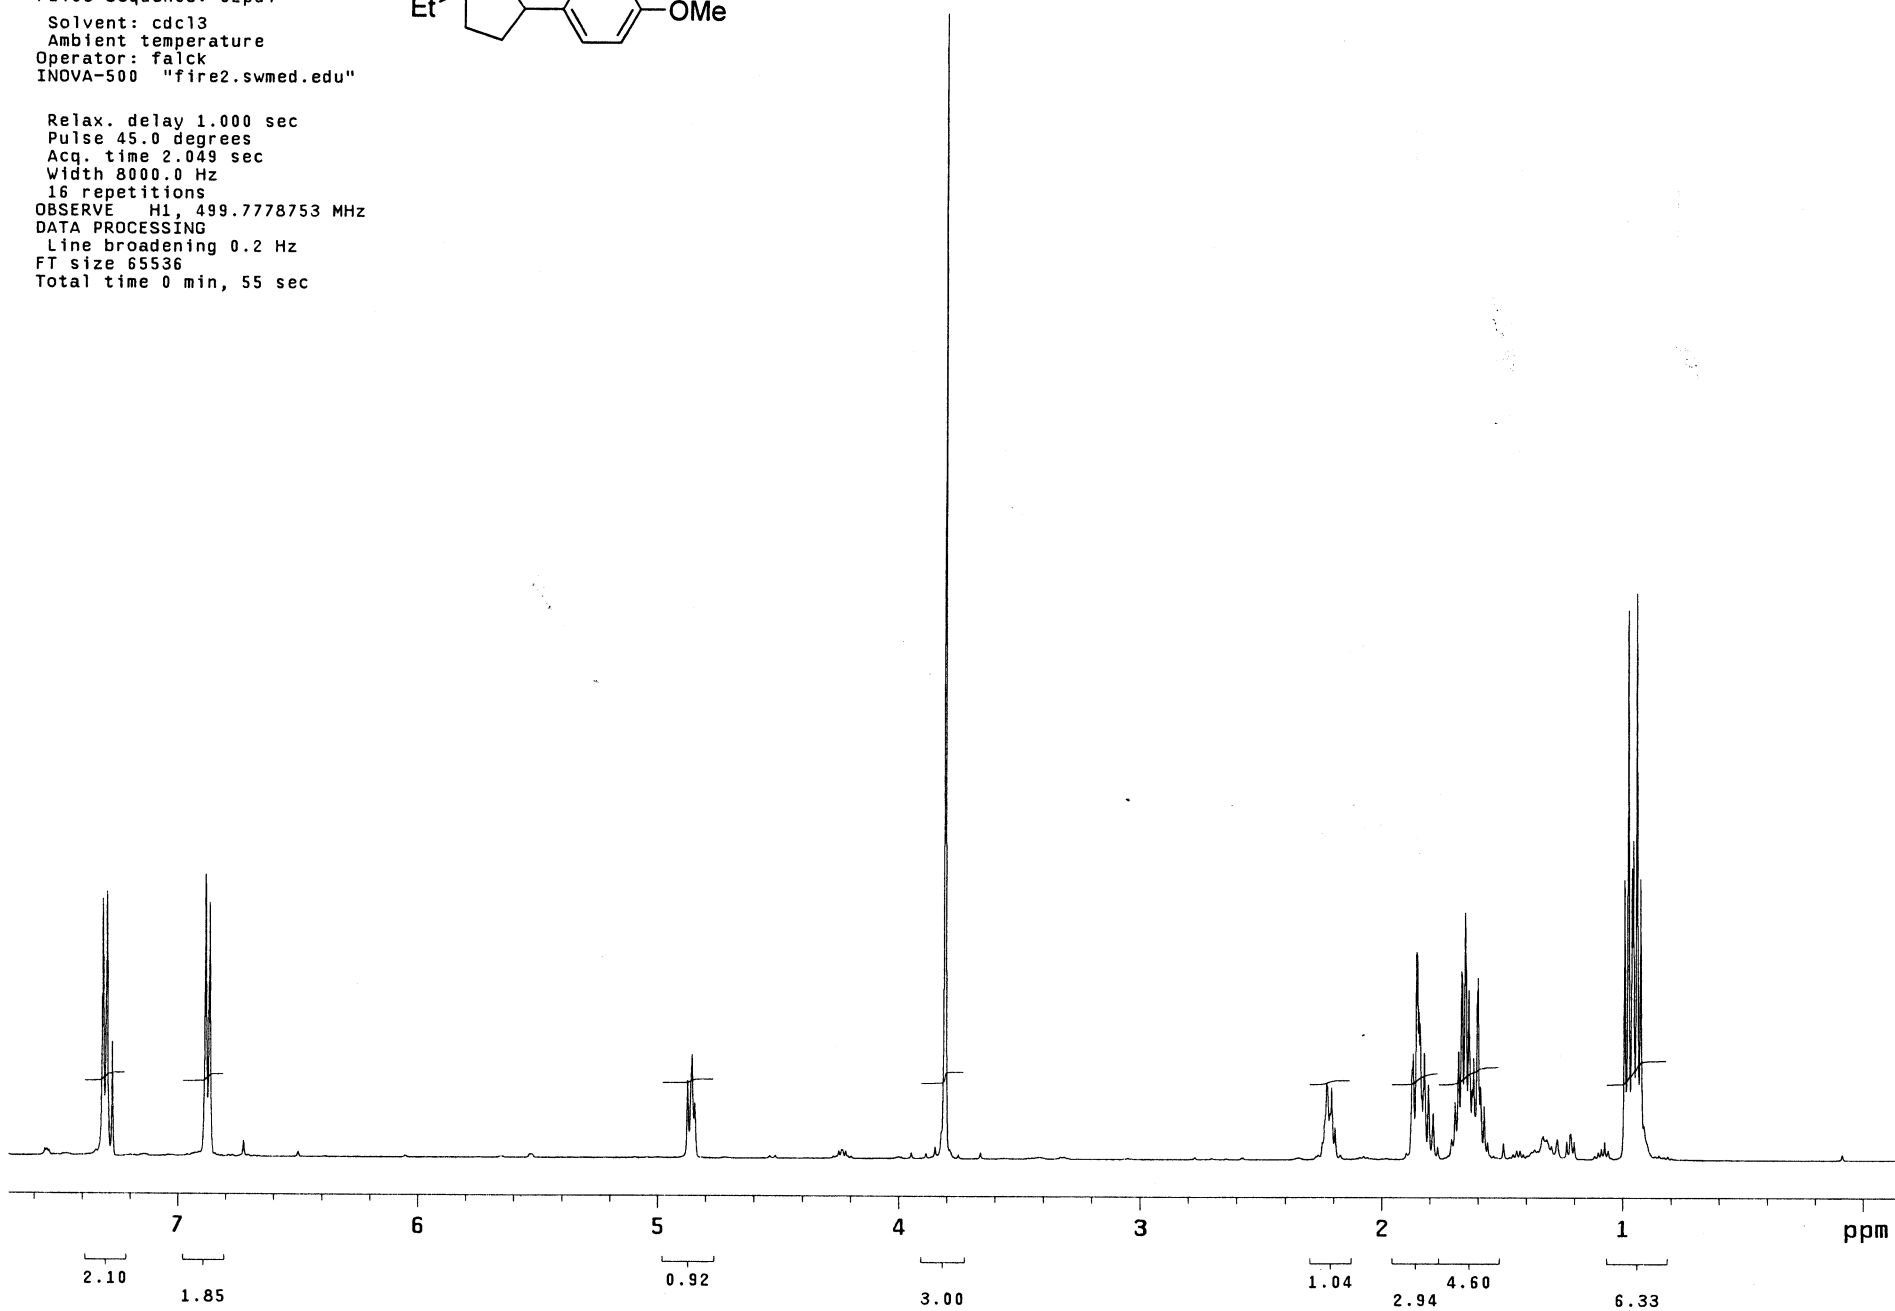

zc2-118

File: Carbon

Pulse Sequence: s2pu1

Solvent: cdc13

Ambient temperature

Operator: falck

INOVA-400 "pele400"

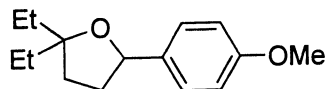

Relax. delay 1.000 sec  
Pulse 45.0 degrees  
Acq. time 1.300 sec  
Width 24125.5 Hz  
18480 repetitions  
OBSERVE C13, 100.5245623 MHz  
DECOUPLE H1, 399.7813047 MHz  
Power 40 dB  
continuously on  
WALTZ-16 modulated  
DATA PROCESSING  
Line broadening 0.5 Hz  
FT size 65536  
Total time 13 hr, 8 min, 16 sec

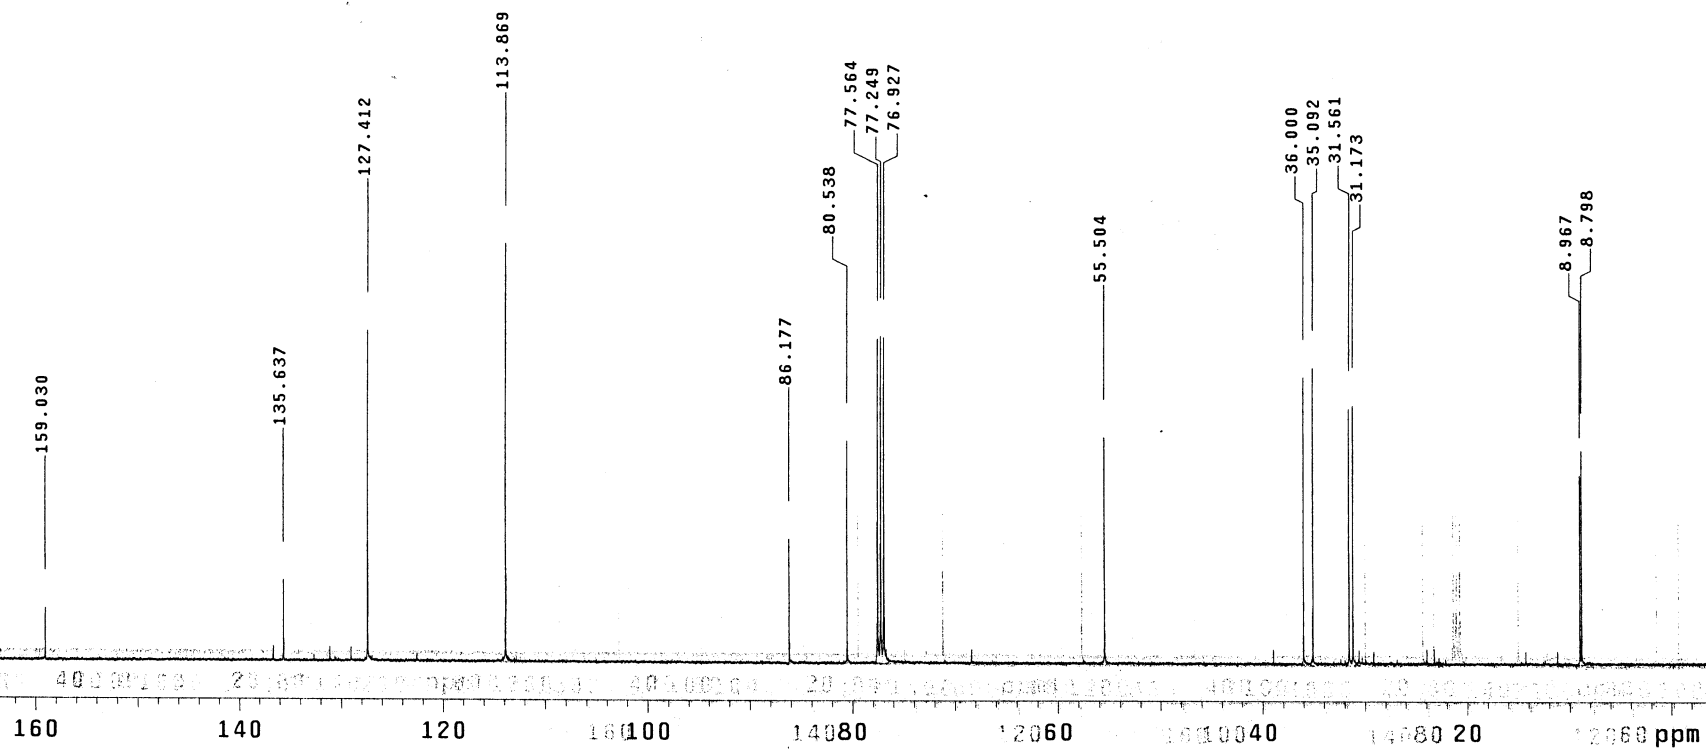



zc2-120

File: Proton

Pulse Sequence: s2pu1

Solvent: cdcl3

Ambient temperature

Operator: falck

INOVA-500 "fire2.swmed.edu"

Relax. delay 1.000 sec

Pulse 45.0 degrees

Acq. time 2.049 sec

Width 8000.0 Hz

16 repetitions

OBSERVE H1, 499.7778753 MHz

DATA PROCESSING

Line broadening 0.2 Hz

FT size 65536

Total time 0 min, 55 sec

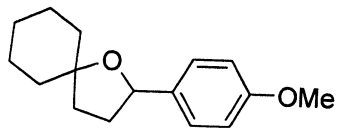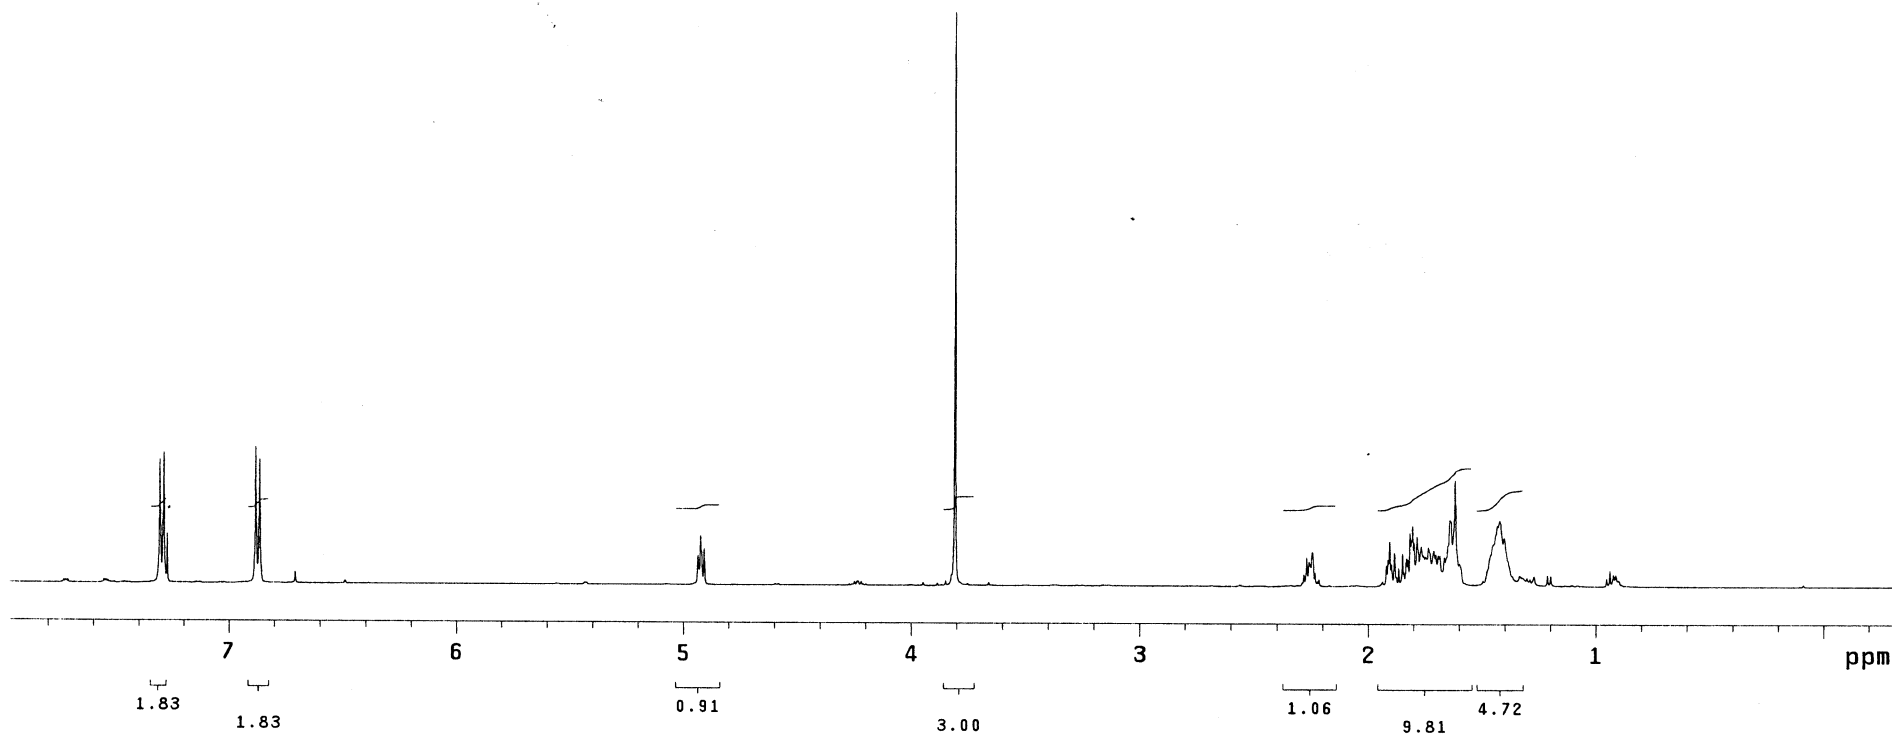

zc2-120

File: zc2-120carbon

Pulse Sequence: s2pu1

Solvent: cdc13

Ambient temperature

Operator: falck

File: zc2-120carbon

INOVA-500 "fire2.swmed.edu"

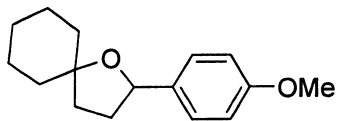

Relax. delay 1.000 sec  
Pulse 45.0 degrees  
Acq. time 1.300 sec  
Width 30165.9 Hz  
20544 repetitions  
OBSERVE C13, 125.6692167 MHz  
DECOUPLE H1, 499.7803743 MHz  
Power 36 dB  
continuously on  
WALTZ-16 modulated  
DATA PROCESSING  
Line broadening 0.5 Hz  
FT size 131072  
Total time 19 hr, 14 min, 41 sec

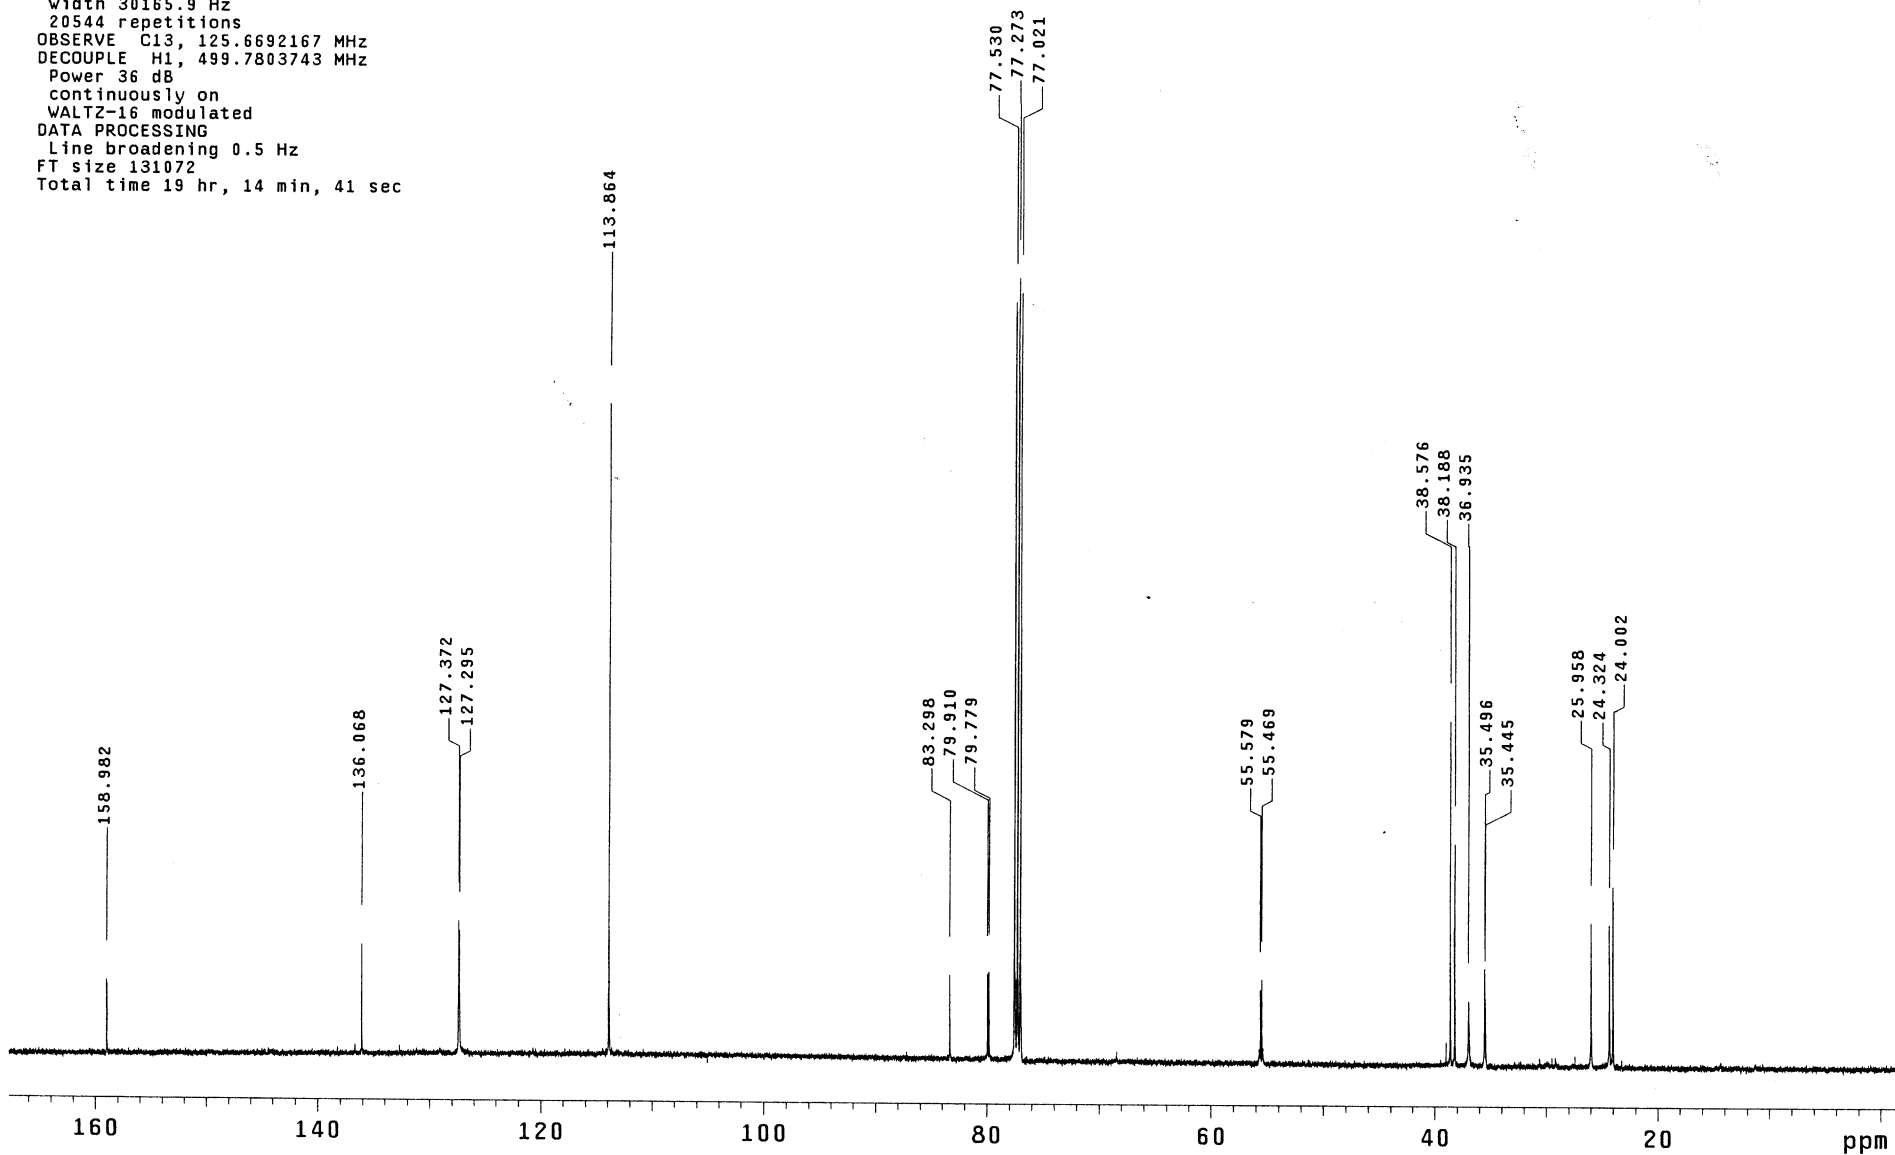

zc2-133

File: Proton

Pulse Sequence: s2pu1

Solvent: cdcl3

Ambient temperature

Operator: falck

INOVA-500 "fire2.swmed.edu"

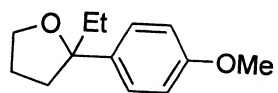

Relax. delay 1.000 sec  
Pulse 45.0 degrees  
Acq. time 2.048 sec  
Width 8000.0 Hz  
8 repetitions  
OBSERVE H1, 499.7778753 MHz  
DATA PROCESSING  
Line broadening 0.2 Hz  
FT size 65536  
Total time 0 min, 30 sec

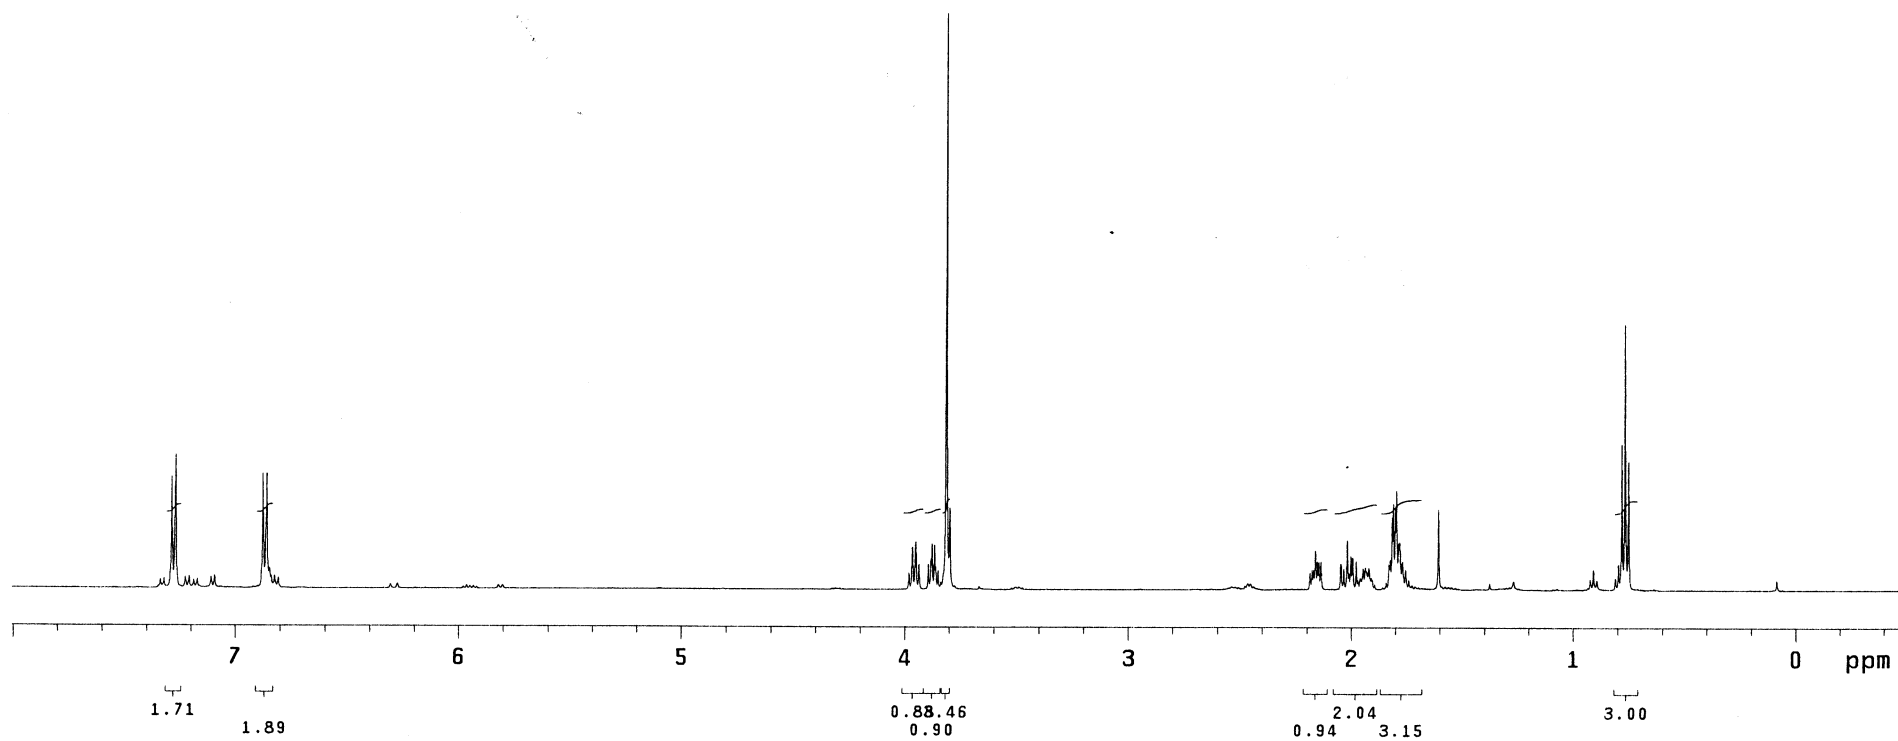

zc2-133

File: Carbon

Pulse Sequence: s2pu1

Solvent: cdcl3

Ambient temperature

Operator: falck

INOVA-500 "fire2.swmed.edu"

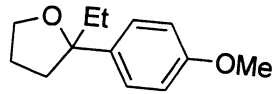

Relax. delay 1.000 sec  
Pulse 45.0 degrees  
Acq. time 1.300 sec  
Width 30165.9 Hz  
360 repetitions  
OBSERVE C13, 125.6692167 MHz  
DECOUPLE H1, 499.7803743 MHz  
Power 36 dB  
continuously on  
WALTZ-16 modulated  
DATA PROCESSING  
Line broadening 0.5 Hz  
FT size 131072  
Total time 6 hr, 24 min, 53 sec

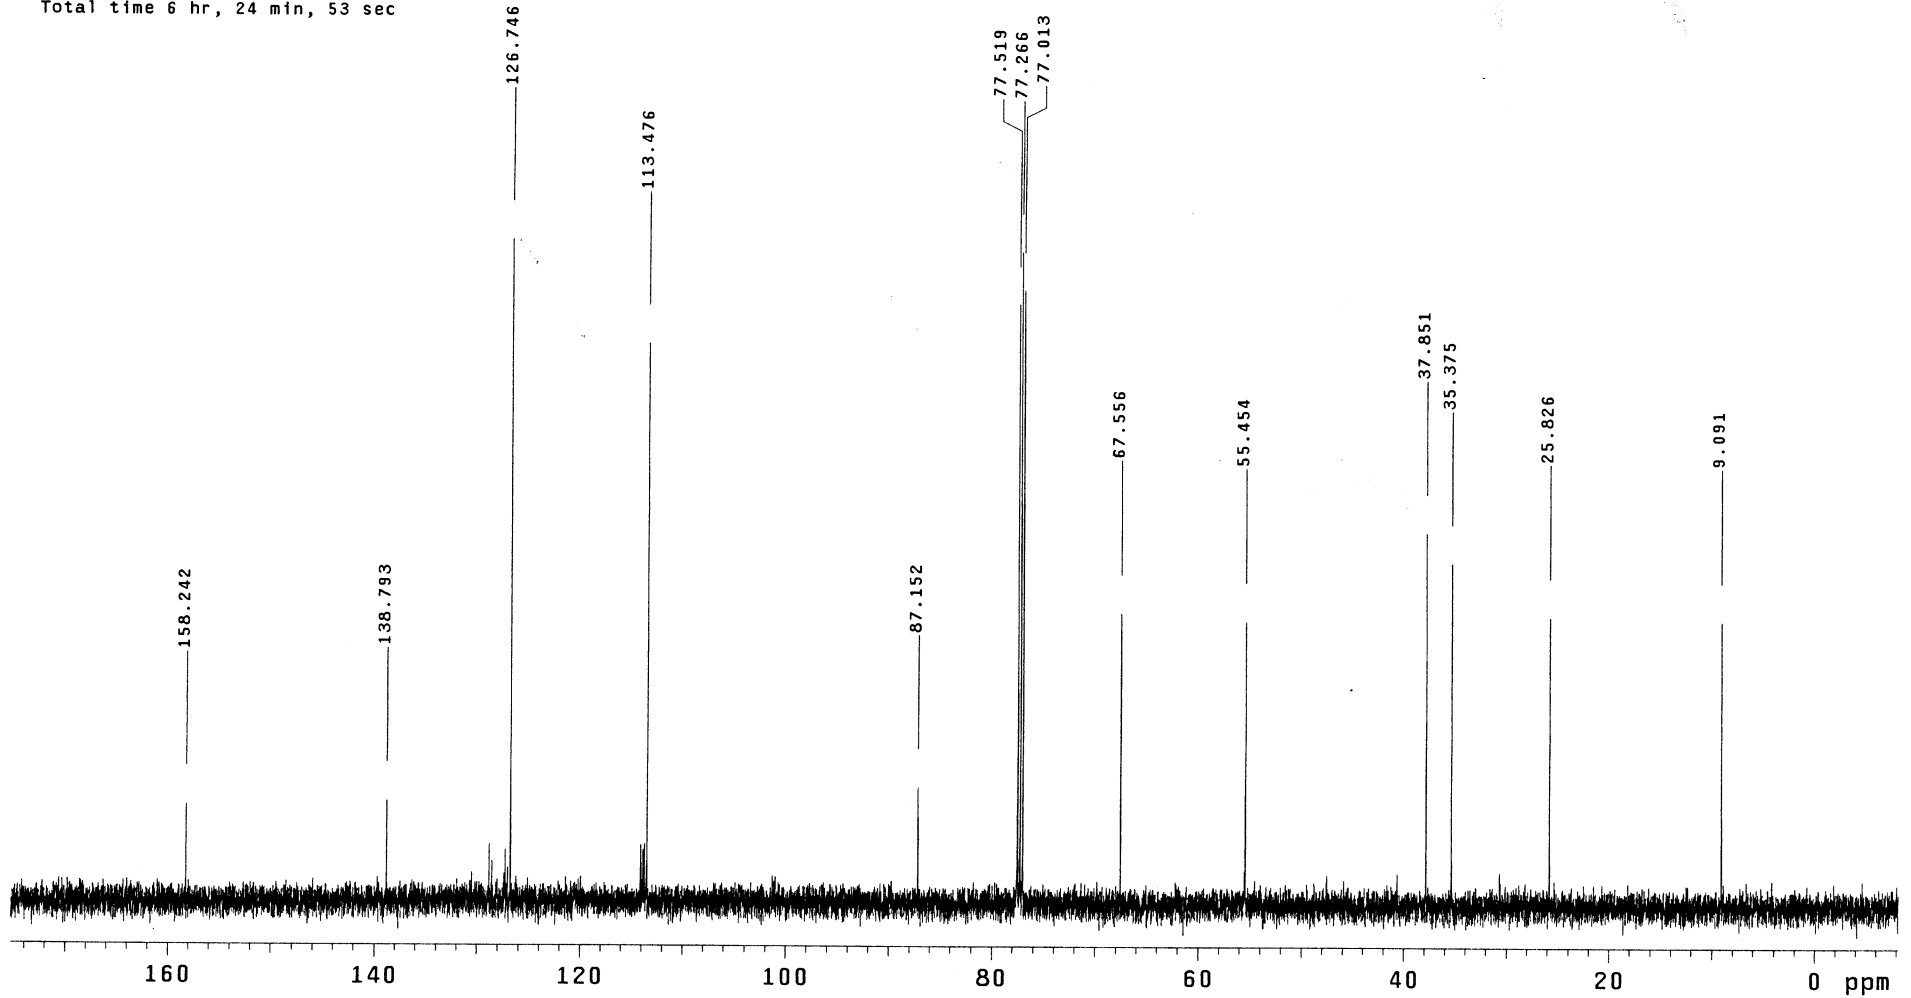

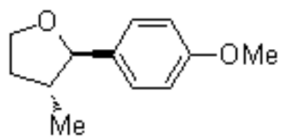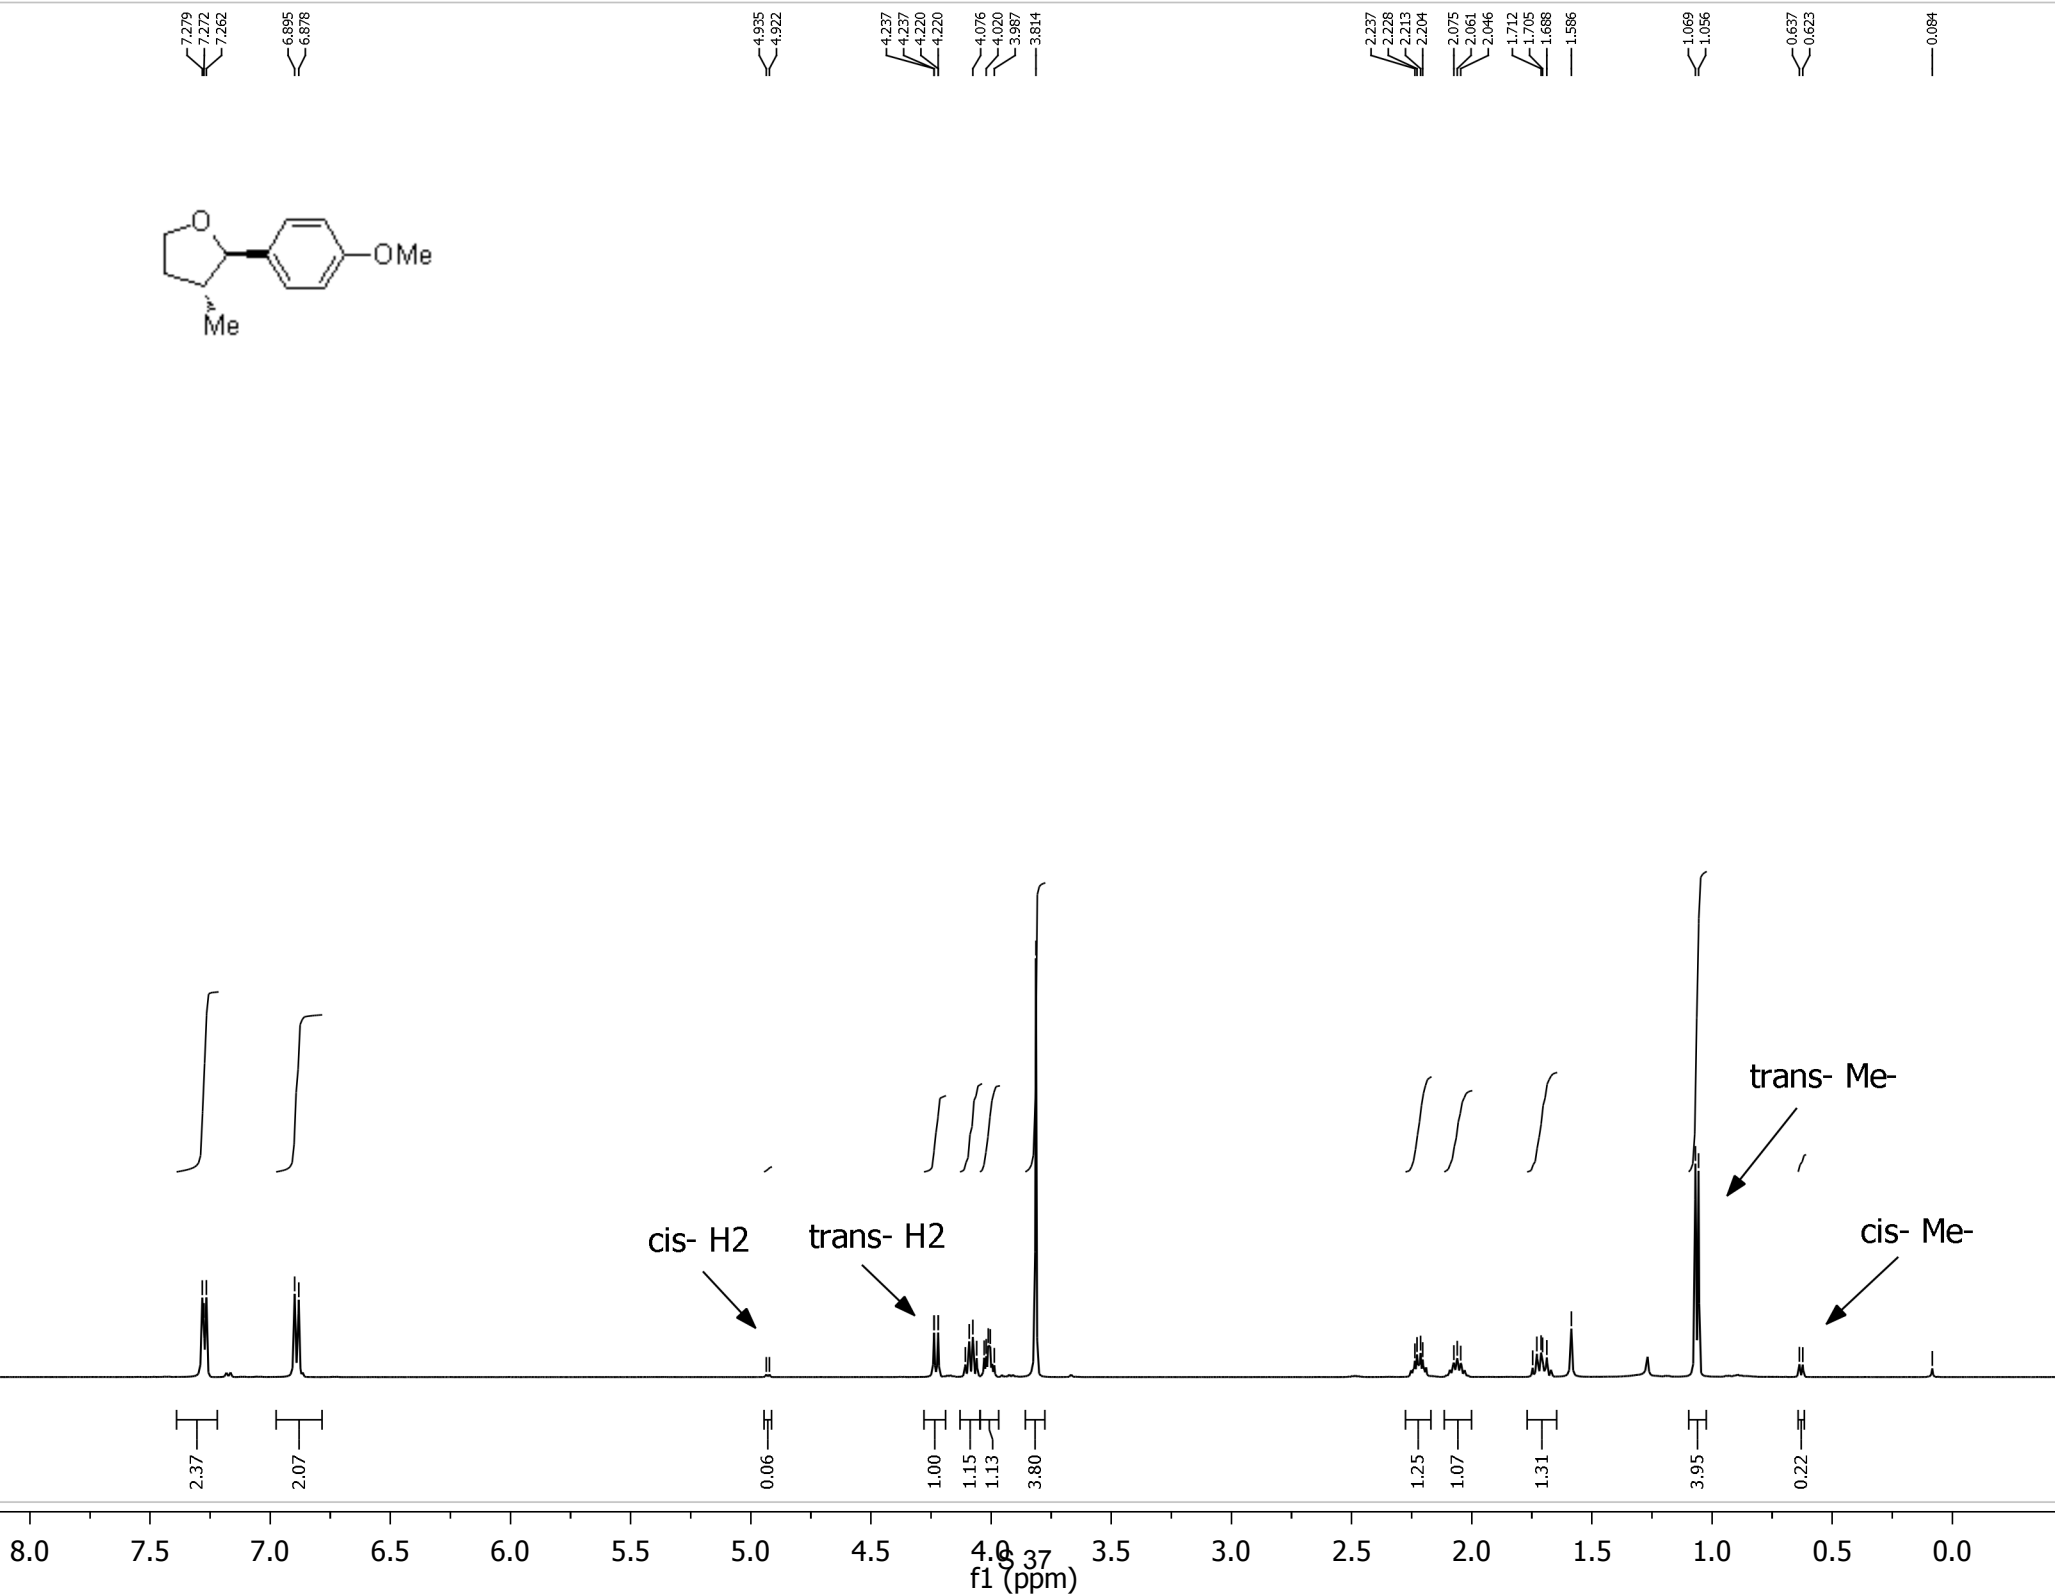

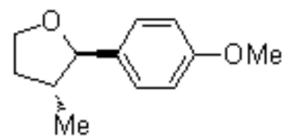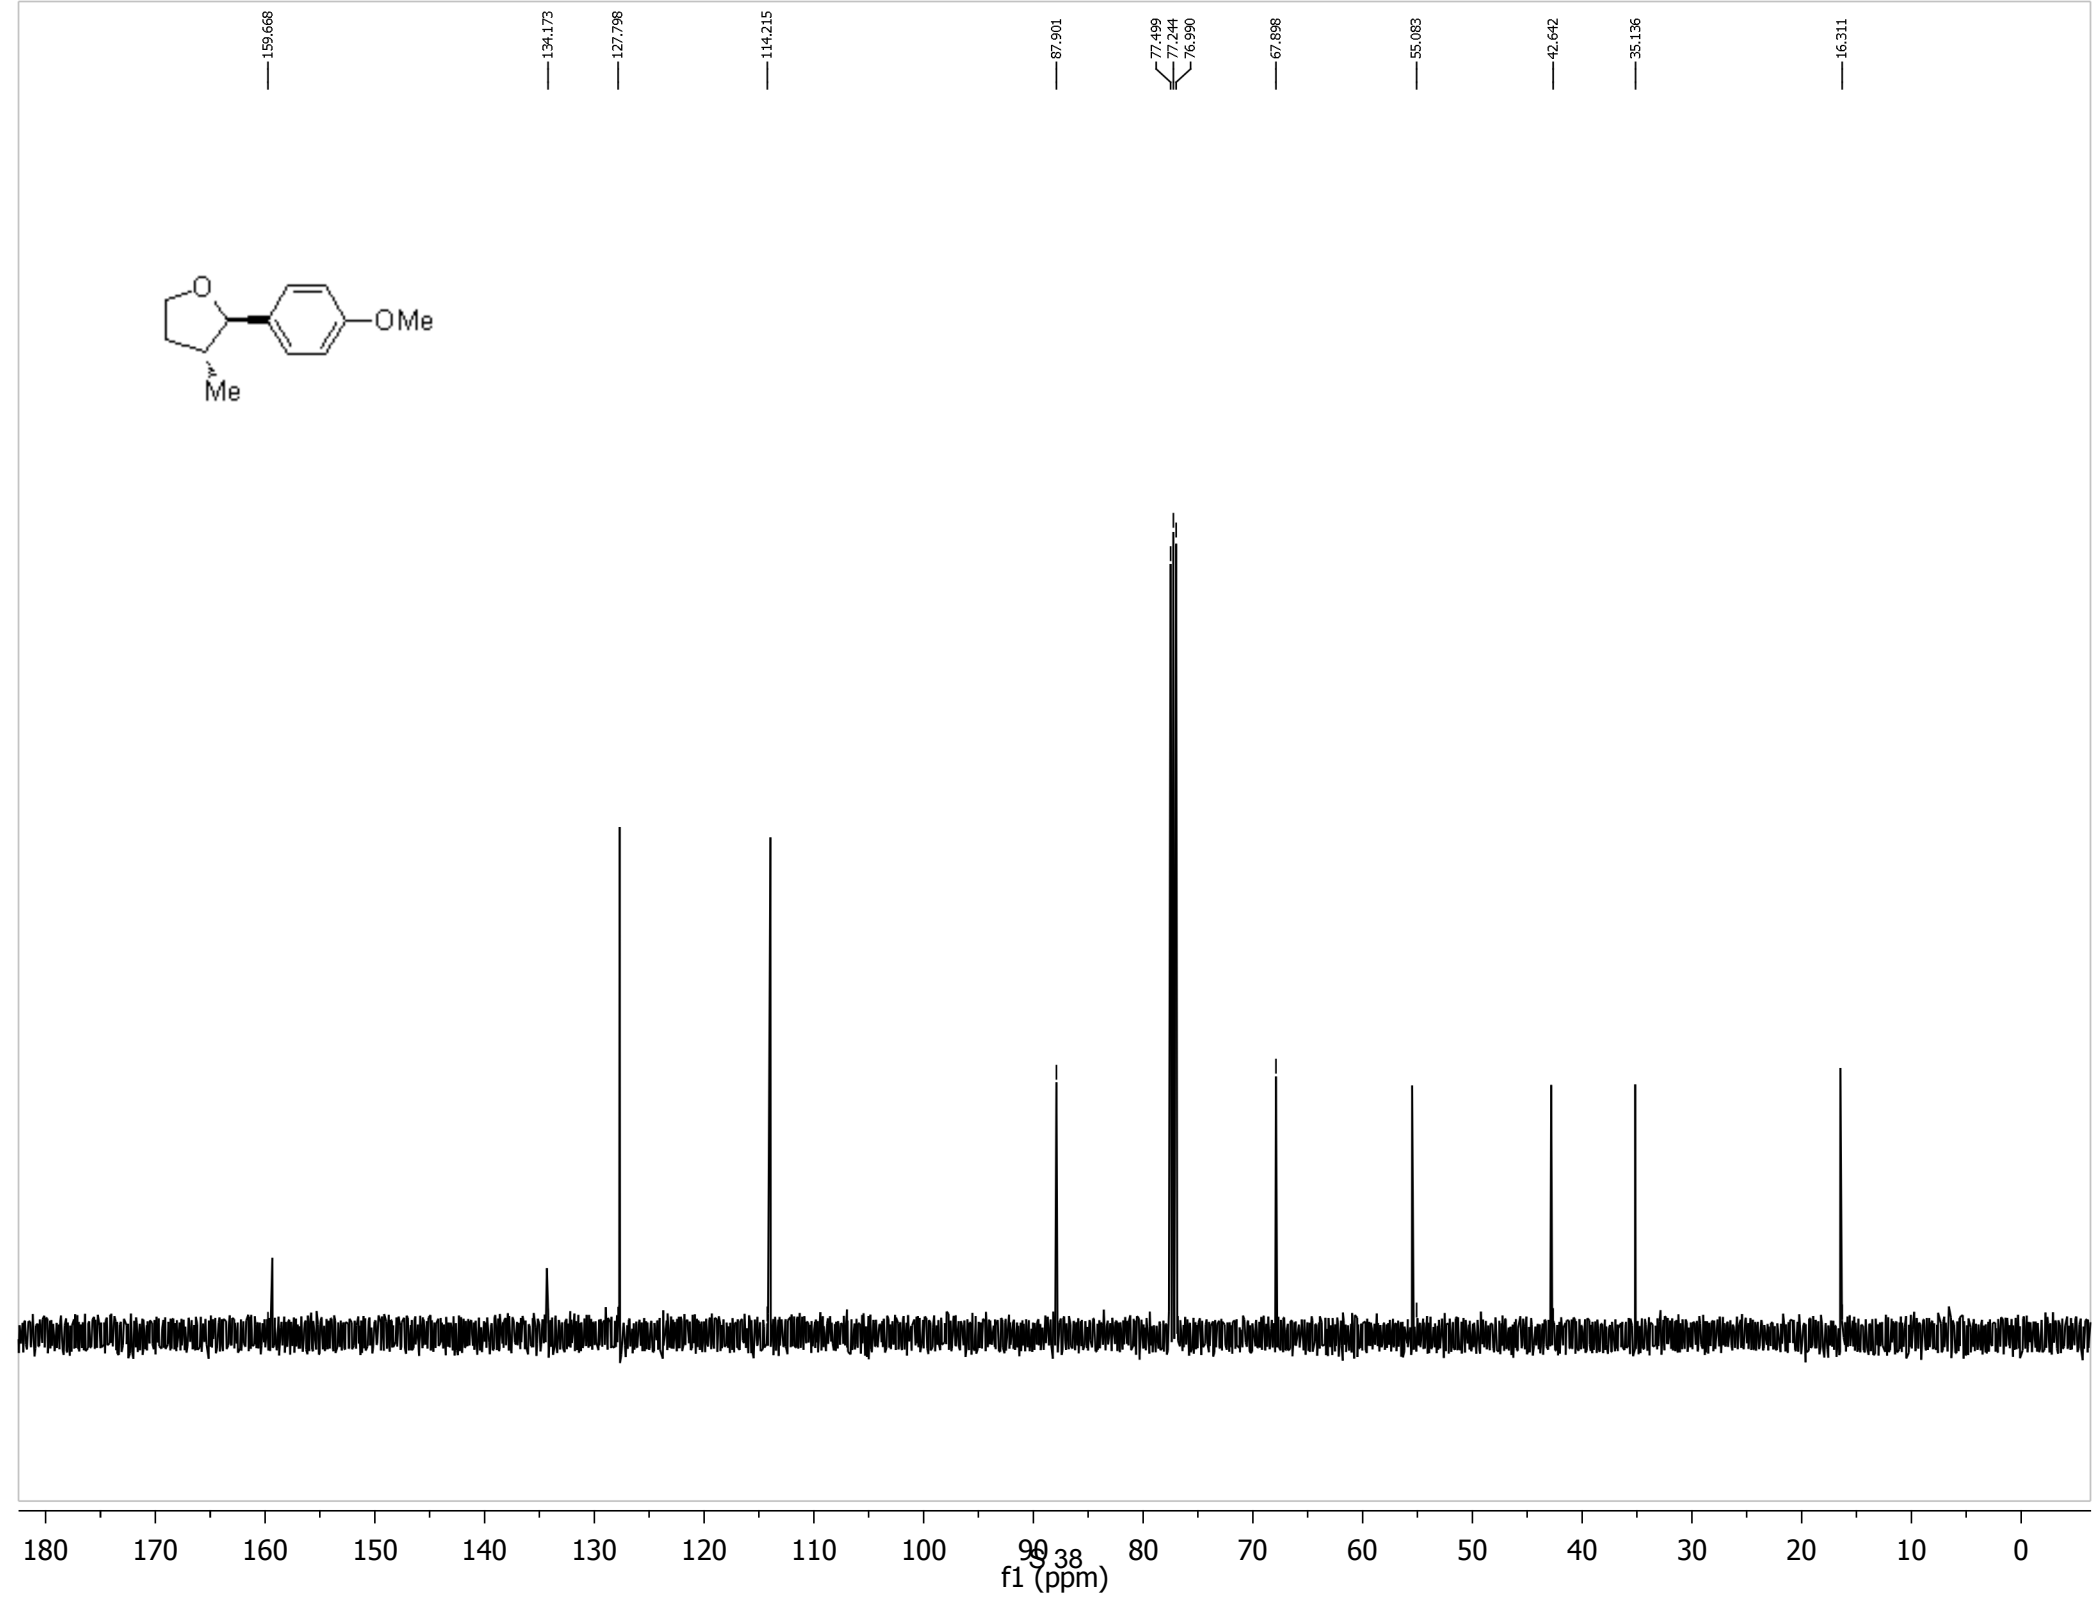

zc2-128

File: Proton

Pulse Sequence: s2pu1

Solvent: cdc13  
Ambient temperature  
Operator: falck  
INNOVA-500 "fire2.swmed.edu"

Relax. delay 1.000 sec  
Pulse 45.0 degrees  
Acq. time 2.048 sec  
Width 8000.0 Hz  
8 repetitions  
OBSERVE H1, 499.7778753 MHz  
DATA PROCESSING  
Line broadening 0.2 Hz  
FT size 65536  
Total time 0 min, 30 sec

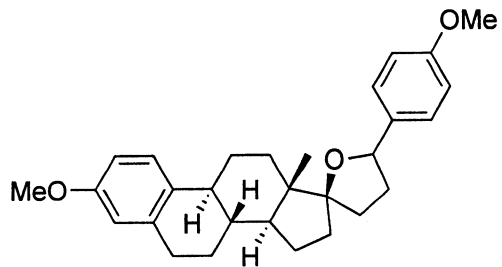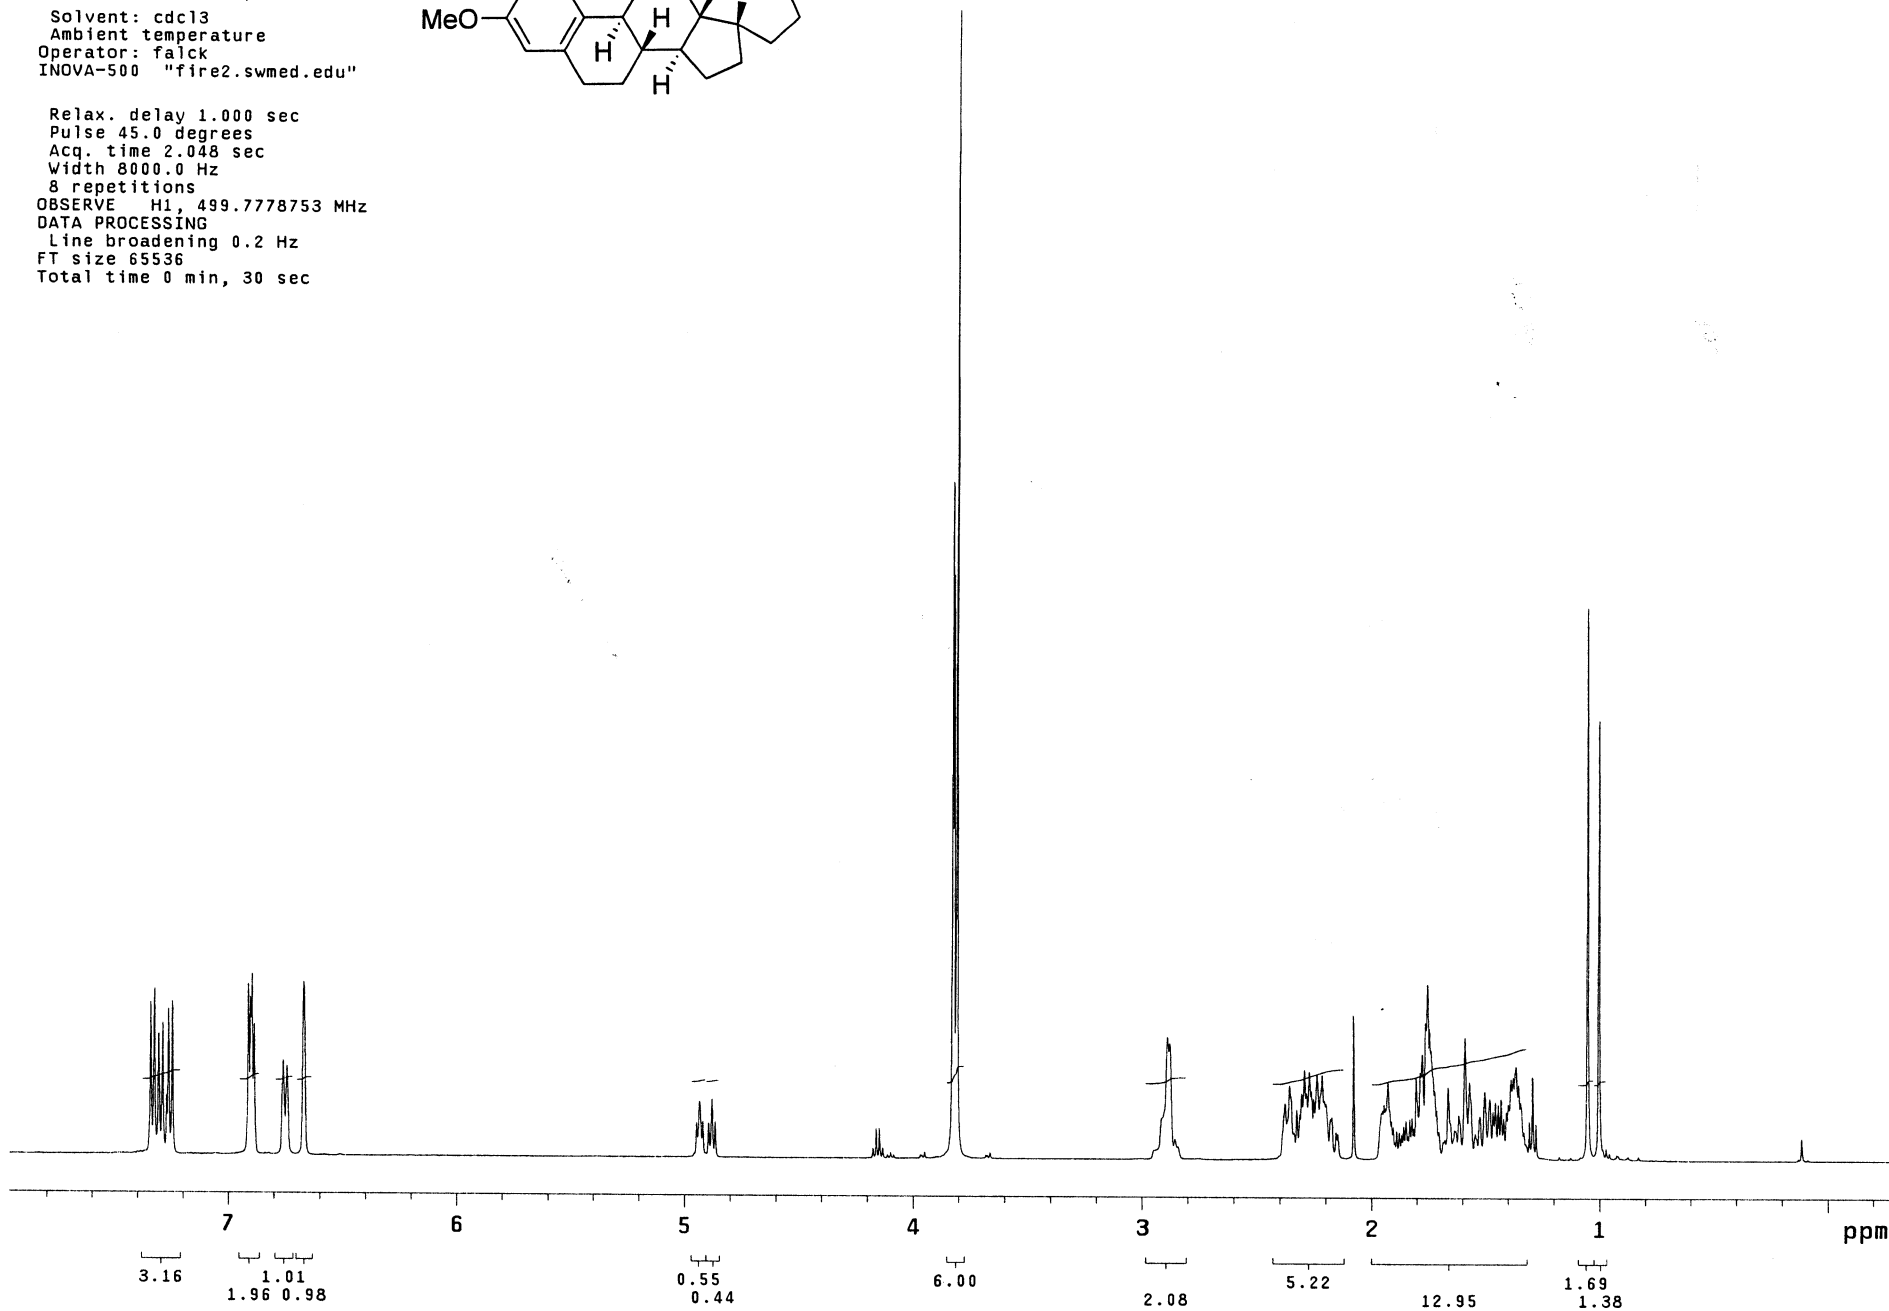

zc2-128

File: Carbon

Pulse Sequence: s2pu1

Solvent: cdc13  
Ambient temperature  
Operator: falck  
INOVA-500 "fire2.swmed.edu"

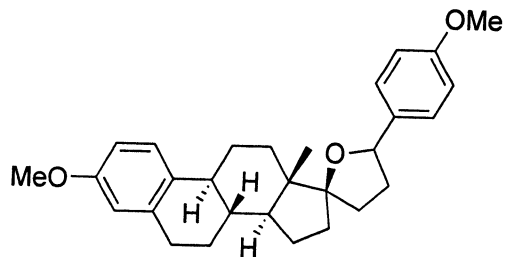

Relax. delay 1.000 sec  
Pulse 45.0 degrees  
Acq. time 1.300 sec  
Width 30165.9 Hz  
776 repetitions  
OBSERVE C13, 125.6692167 MHz  
DECOUPLE H1, 499.7803743 MHz  
Power 36 dB  
continuously on  
WALTZ-16 modulated  
DATA PROCESSING  
Line broadening 0.5 Hz  
FT size 131072  
Total time 19 hr, 14 min, 41 sec

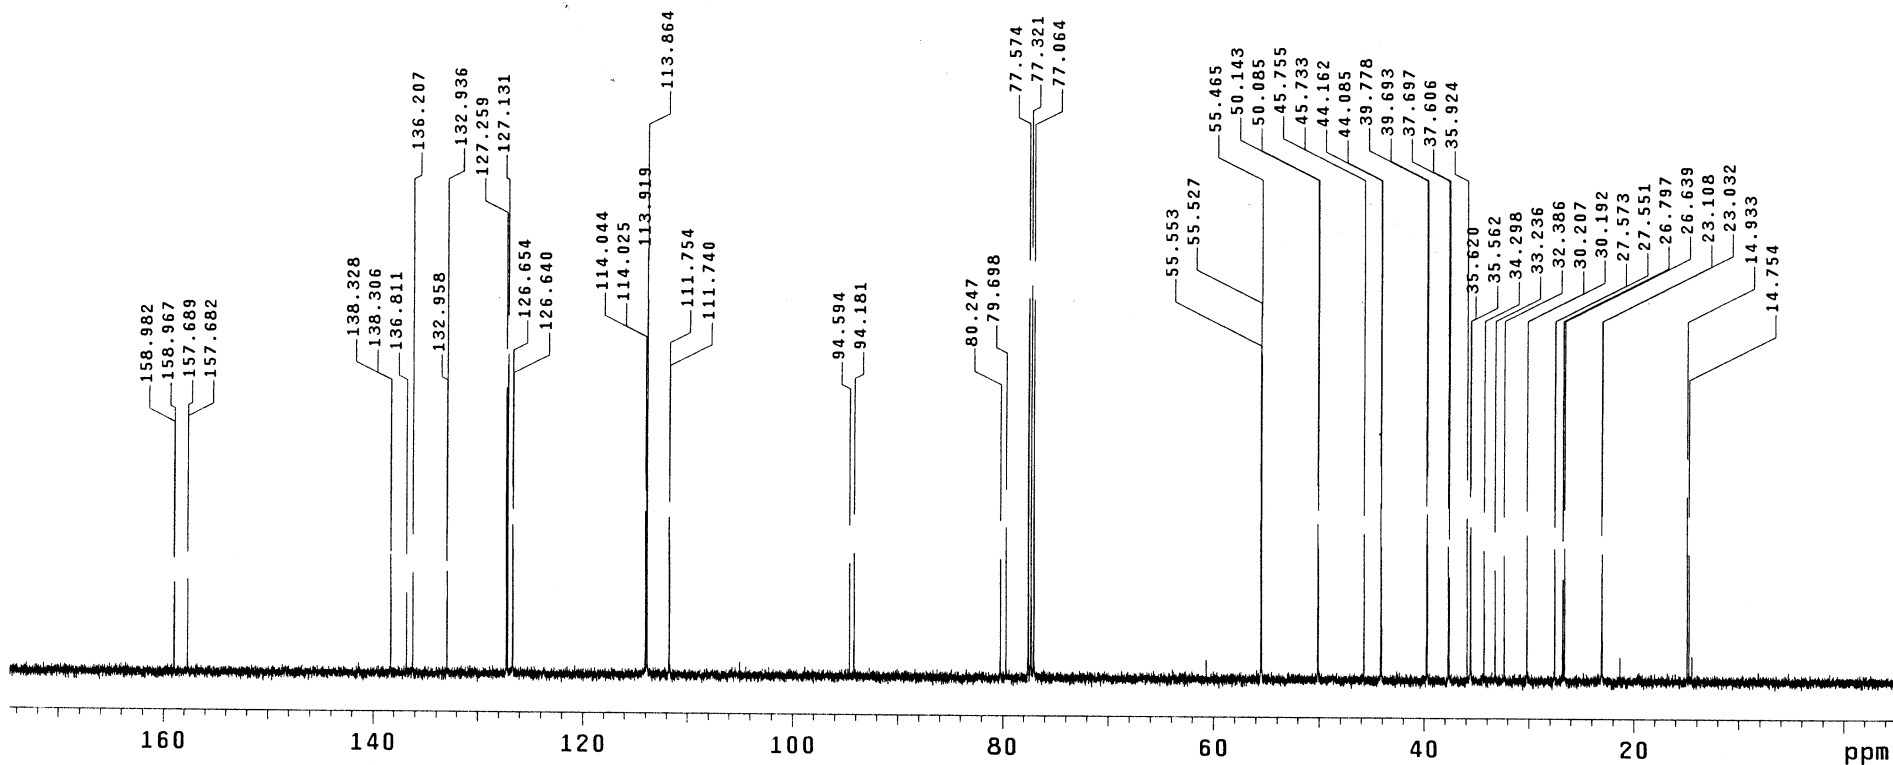



zc2-136a

File: Proton

Pulse Sequence: s2pul

Solvent: cdc13

Ambient temperature

Operator: falck

INOVA-500 "fire2.swmed.edu"

Relax. delay 1.000 sec

Pulse 45.0 degrees

Acq. time 2.049 sec

Width 8000.0 Hz

8 repetitions

OBSERVE H1, 499.7778753 MHz

DATA PROCESSING

Line broadening 0.2 Hz

FT size 65536

Total time 0 min, 30 sec

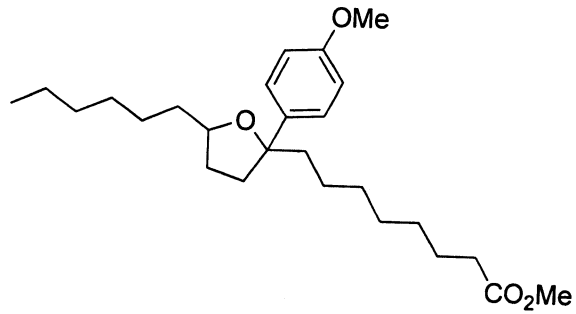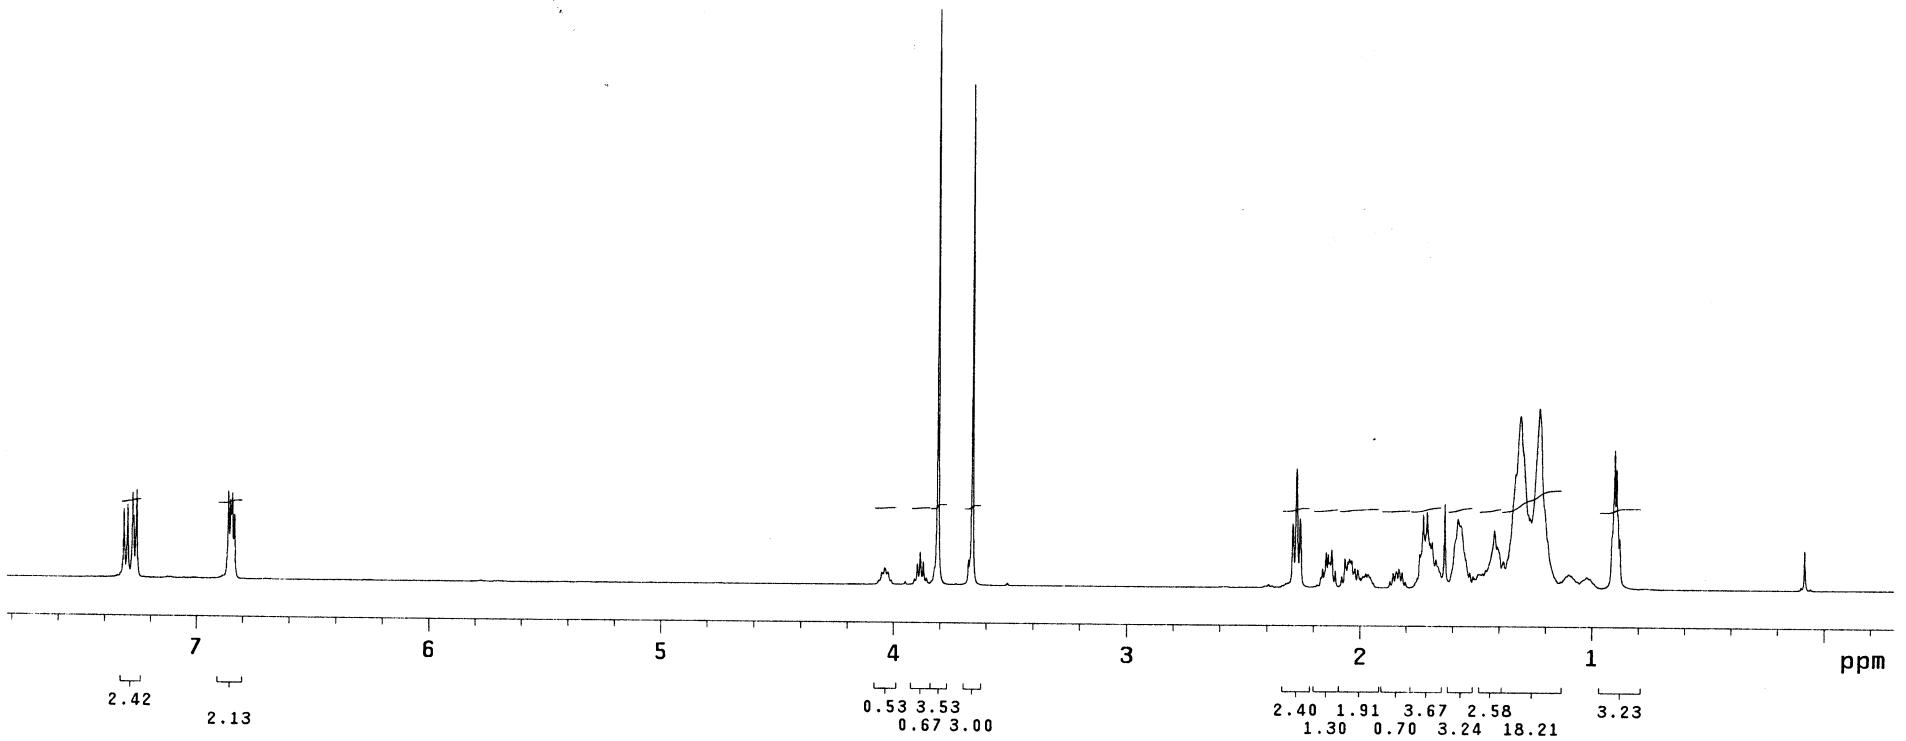

zc2-136a

File: Carbon

Pulse Sequence: s2pu1

Solvent: cdcl3

Ambient temperature

Operator: falck

INOVA-500 "fire2.swmed.edu"

Relax. delay 1.000 sec

Pulse 45.0 degrees

Acq. time 1.300 sec

Width 30165.9 Hz

21712 repetitions

OBSERVE C13, 125.6692167 MHz

DECOUPLE H1, 499.7803743 MHz

Power 36 dB

continuously on

WALTZ-16 modulated

DATA PROCESSING

Line broadening 0.5 Hz

FT size 131072

Total time 19 hr, 14 min, 41 sec

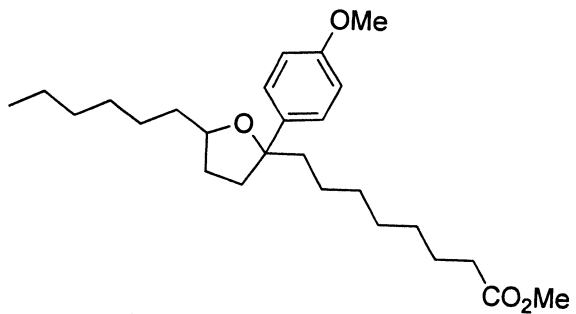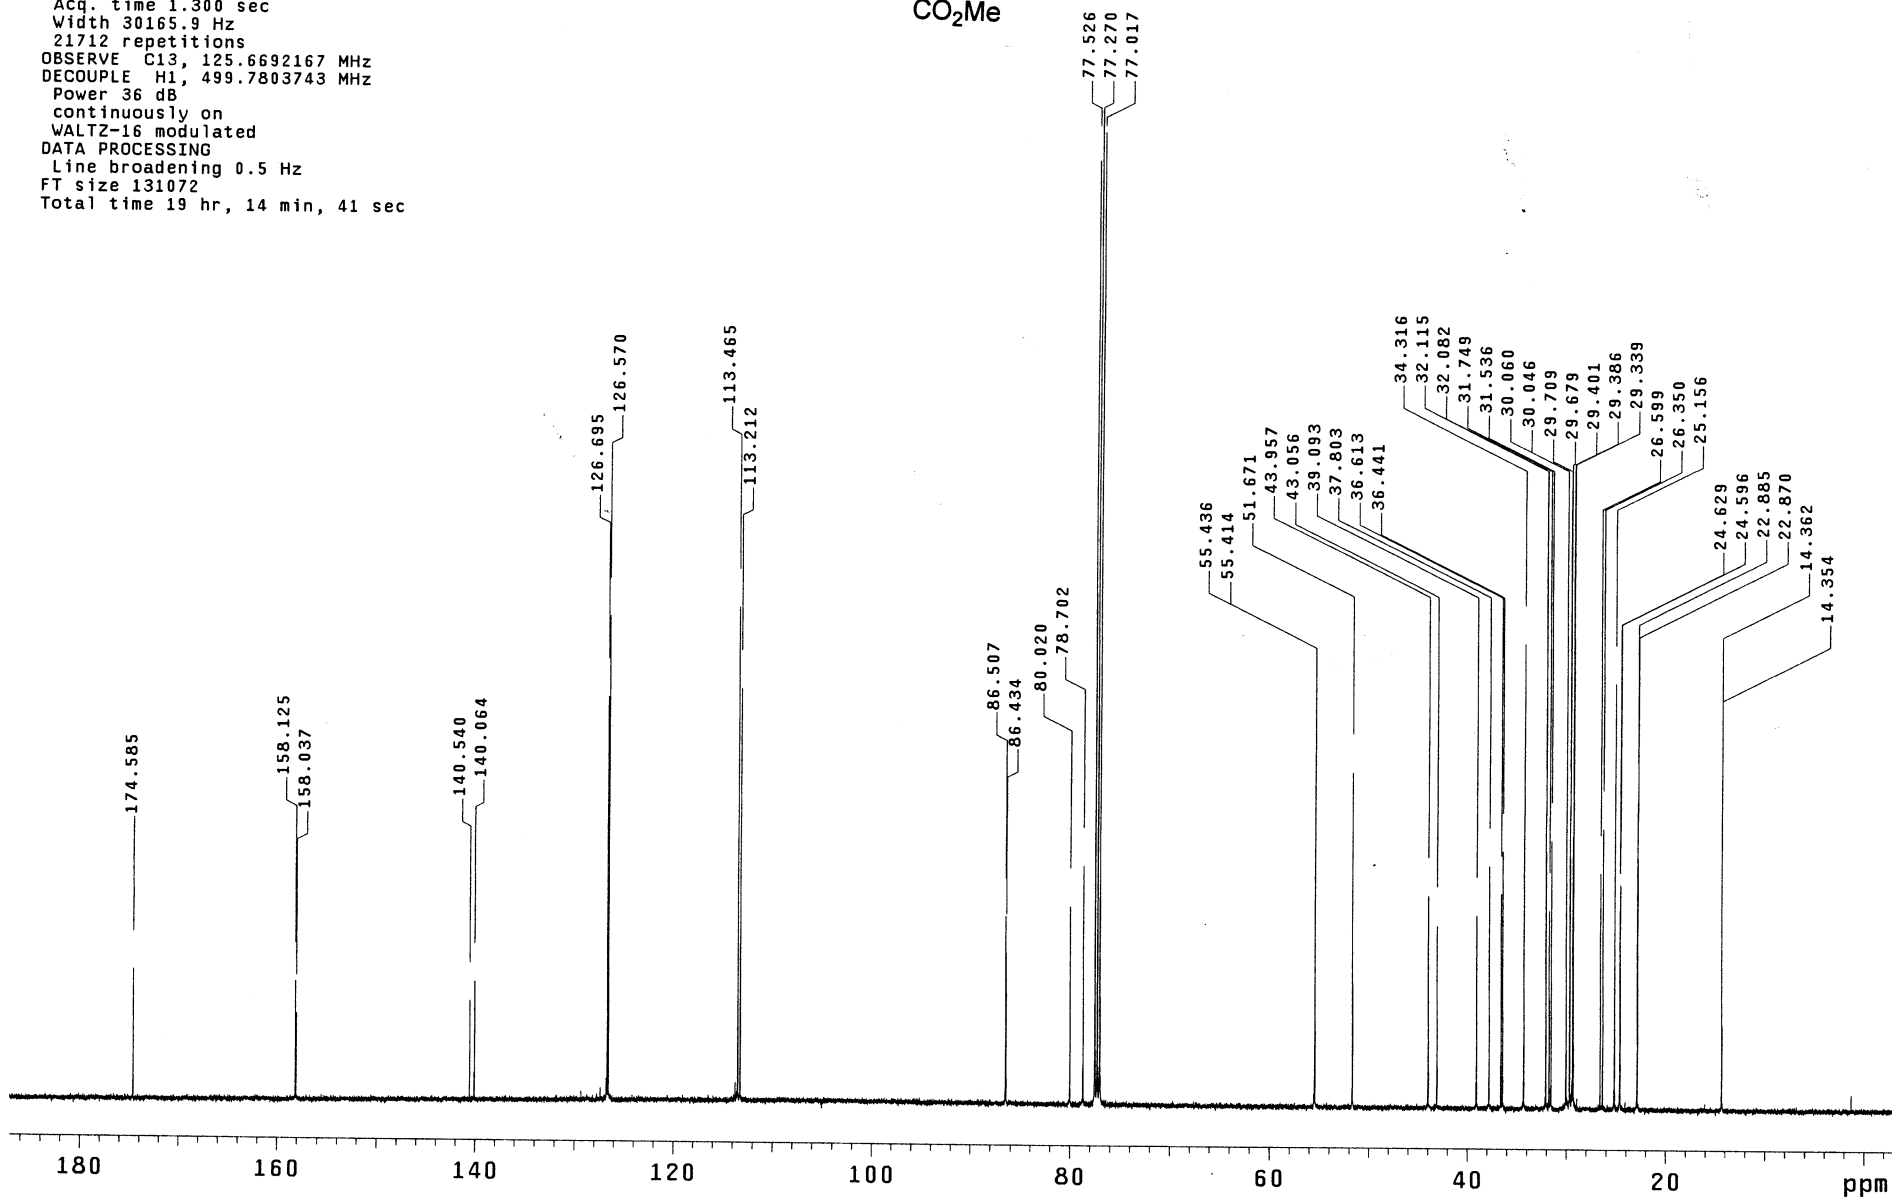

zc2-165

File: Proton

Pulse Sequence: s2pu1

Solvent: cdcl3

Ambient temperature

Operator: falck

INOVA-500 "fire2.swmed.edu"

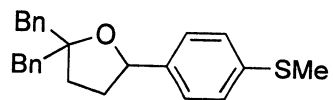

Relax. delay 1.000 sec  
Pulse 45.0 degrees  
Acq. time 2.049 sec  
Width 8000.0 Hz  
8 repetitions  
OBSERVE H1, 499.7778753 MHz  
DATA PROCESSING  
Line broadening 0.2 Hz  
FT size 65536  
Total time 0 min, 30 sec

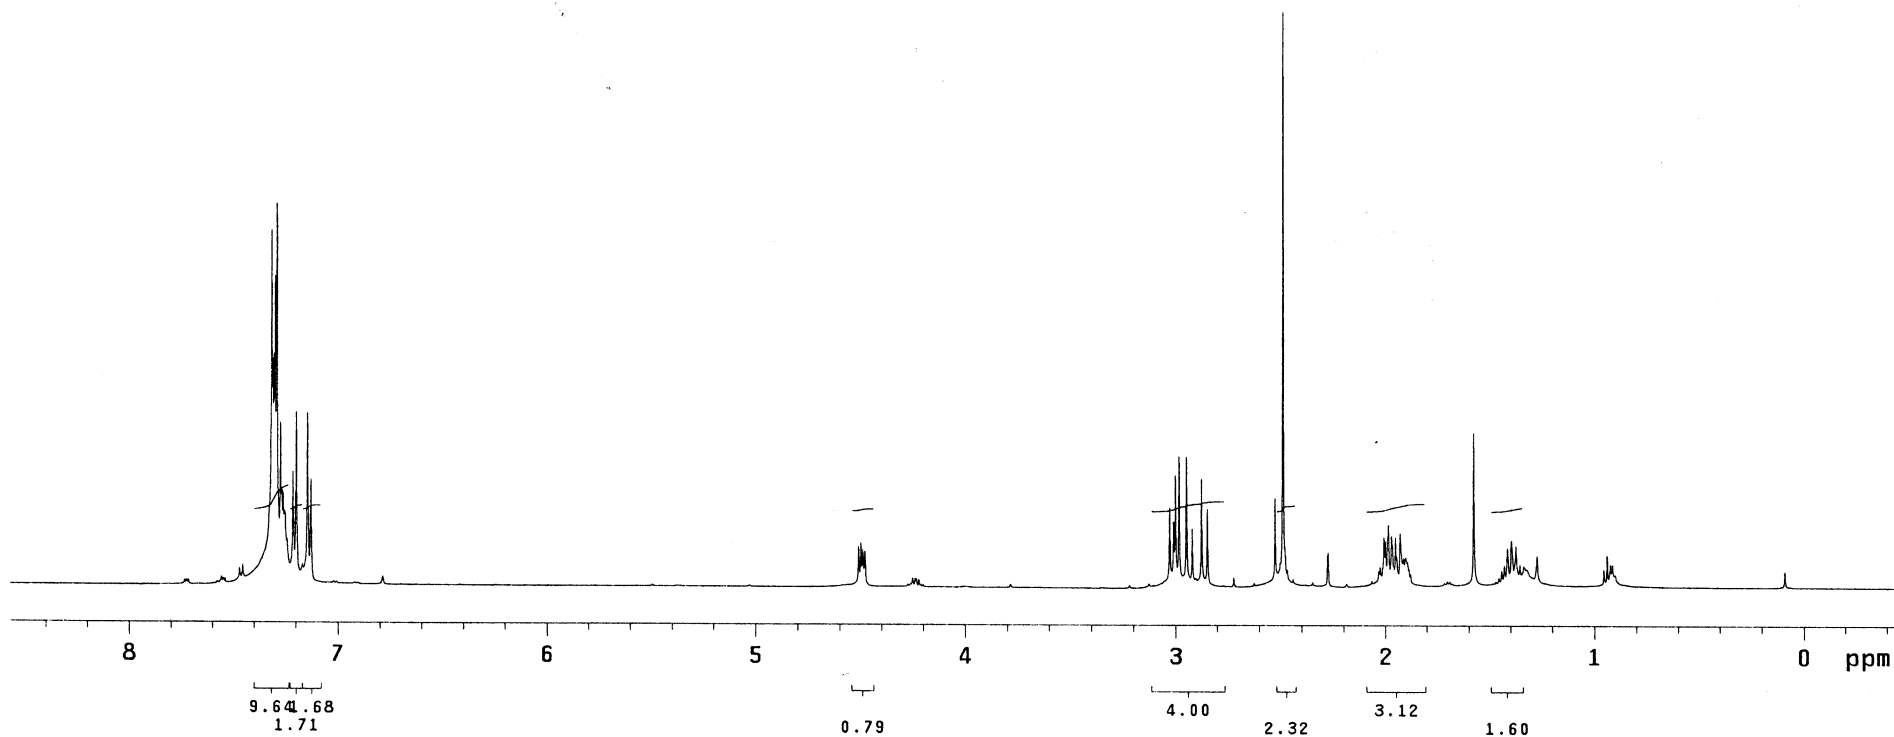

zc2-165

File: Carbon

Pulse Sequence: s2pu1

Solvent: cdc13

Ambient temperature

Operator: falck

INOVA-500 "fire2.swmed.edu"

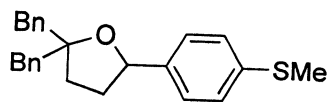

Relax. delay 1.000 sec  
Pulse 45.0 degrees  
Acq. time 1.300 sec  
Width 30165.9 Hz  
21664 repetitions  
OBSERVE C13, 125.6692167 MHz  
DECOUPLE H1, 499.7803743 MHz  
Power 36 dB  
continuously on  
WALTZ-16 modulated  
DATA PROCESSING  
Line broadening 0.5 Hz  
FT size 131072  
Total time 32 hr, 4 min, 29 sec

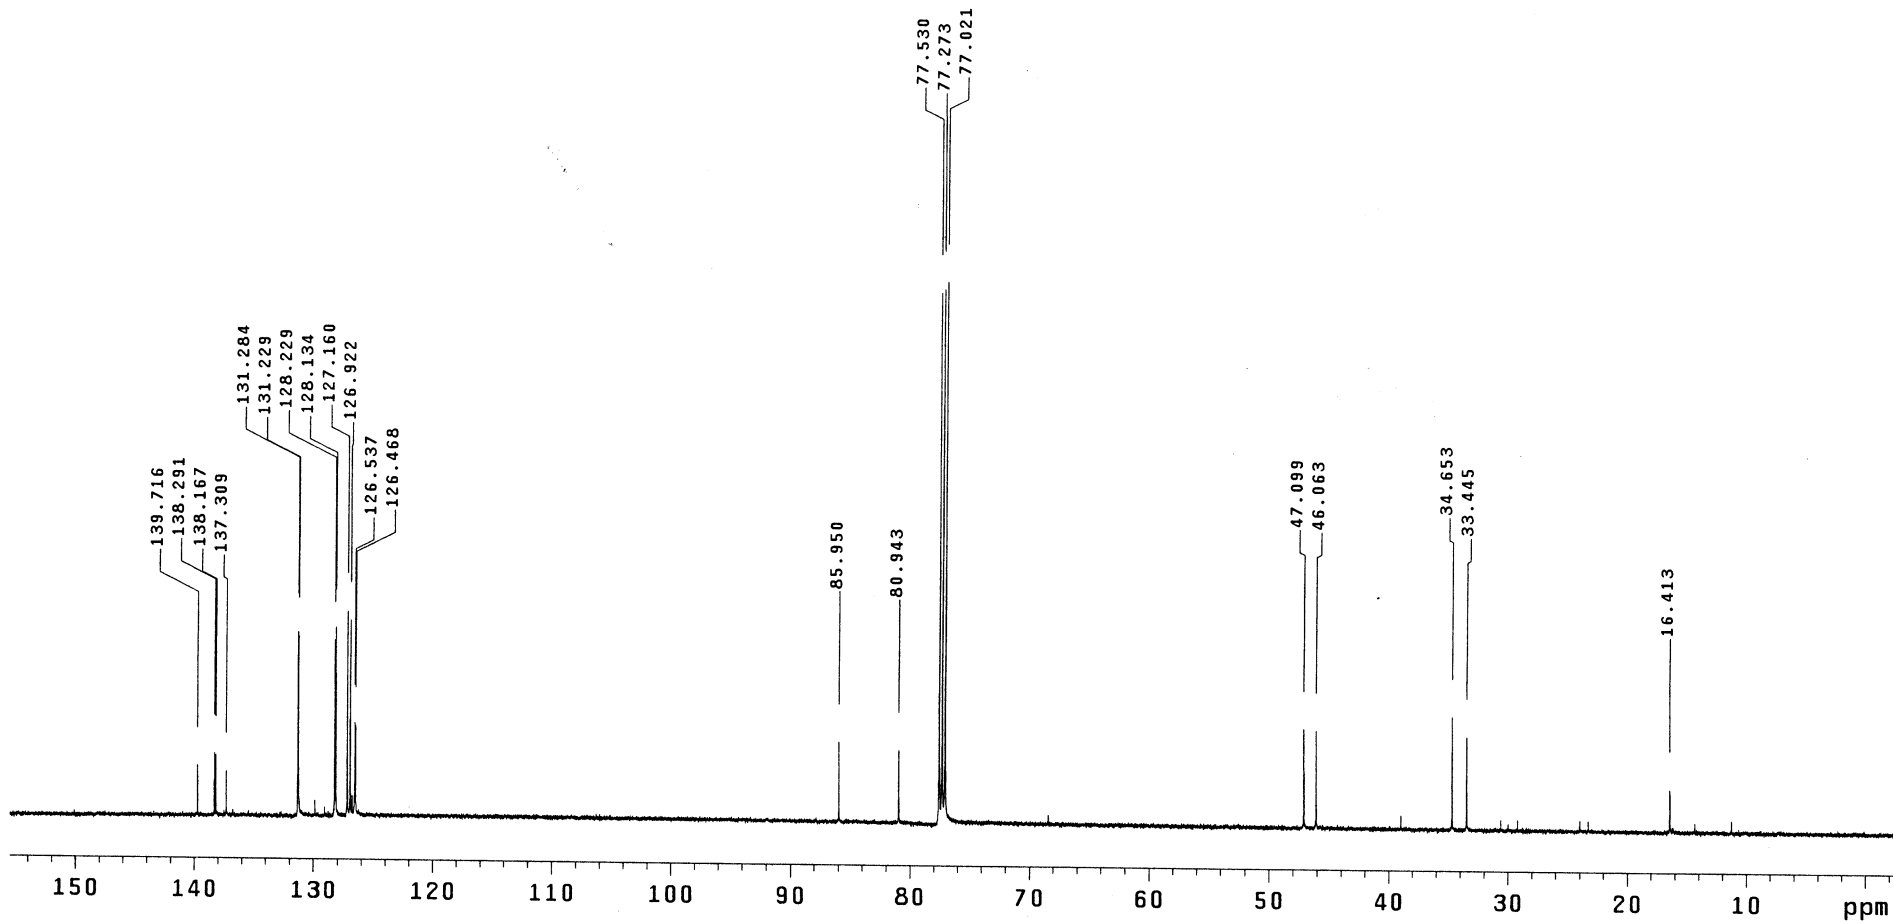

zc2-166

File: zc2-166

Pulse Sequence: s2pu1

Solvent: cdcl3

Ambient temperature

Operator: falck

File: zc2-166

INOVA-500 "fire2.swmed.edu"

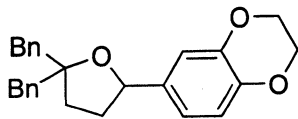

Relax. delay 1.000 sec  
Pulse 45.0 degrees  
Acq. time 2.048 sec  
Width 8000.0 Hz  
8 repetitions  
OBSERVE H1, 499.7778753 MHz  
DATA PROCESSING  
Line broadening 0.2 Hz  
FT size 65536  
Total time 0 min, 30 sec

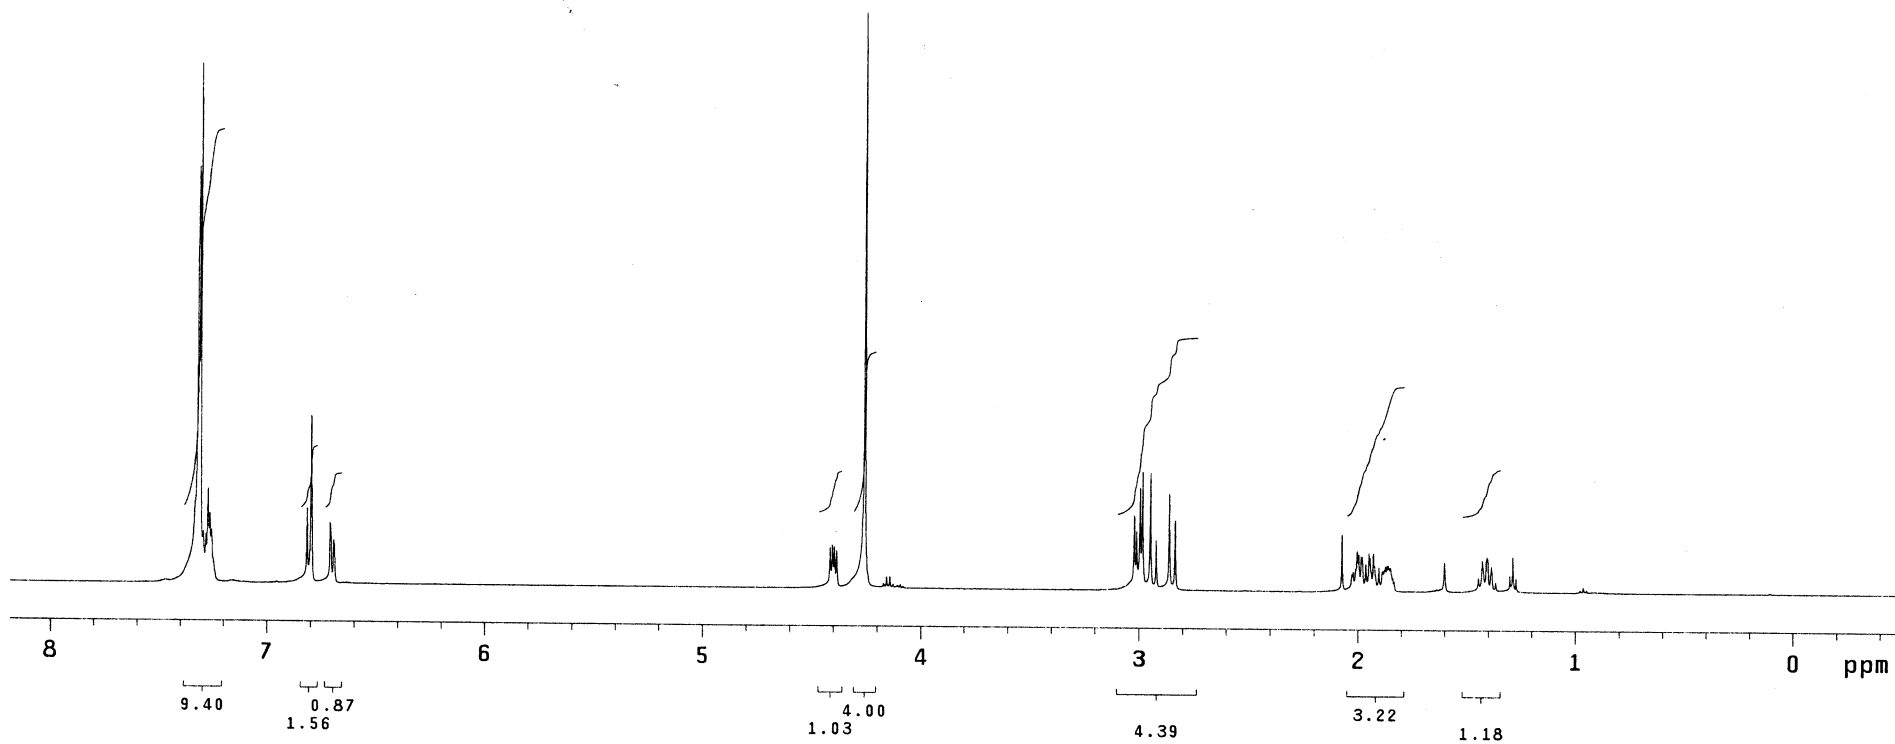

zc2-166

File: Carbon

Pulse Sequence: s2pu1

Solvent: cdcl3  
Ambient temperature  
Operator: falck  
INOVA-500 "fire2.swmed.edu"

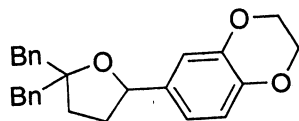

Relax. delay 1.000 sec  
Pulse 45.0 degrees  
Acq. time 1.300 sec  
Width 30165.9 Hz  
408 repetitions  
OBSERVE C13, 125.6692167 MHz  
DECOUPLE H1, 499.7803743 MHz  
Power 36 dB  
continuously on  
WALTZ-16 modulated  
DATA PROCESSING  
Line broadening 0.5 Hz  
FT size 131072  
Total time 6 hr, 24 min, 53 sec

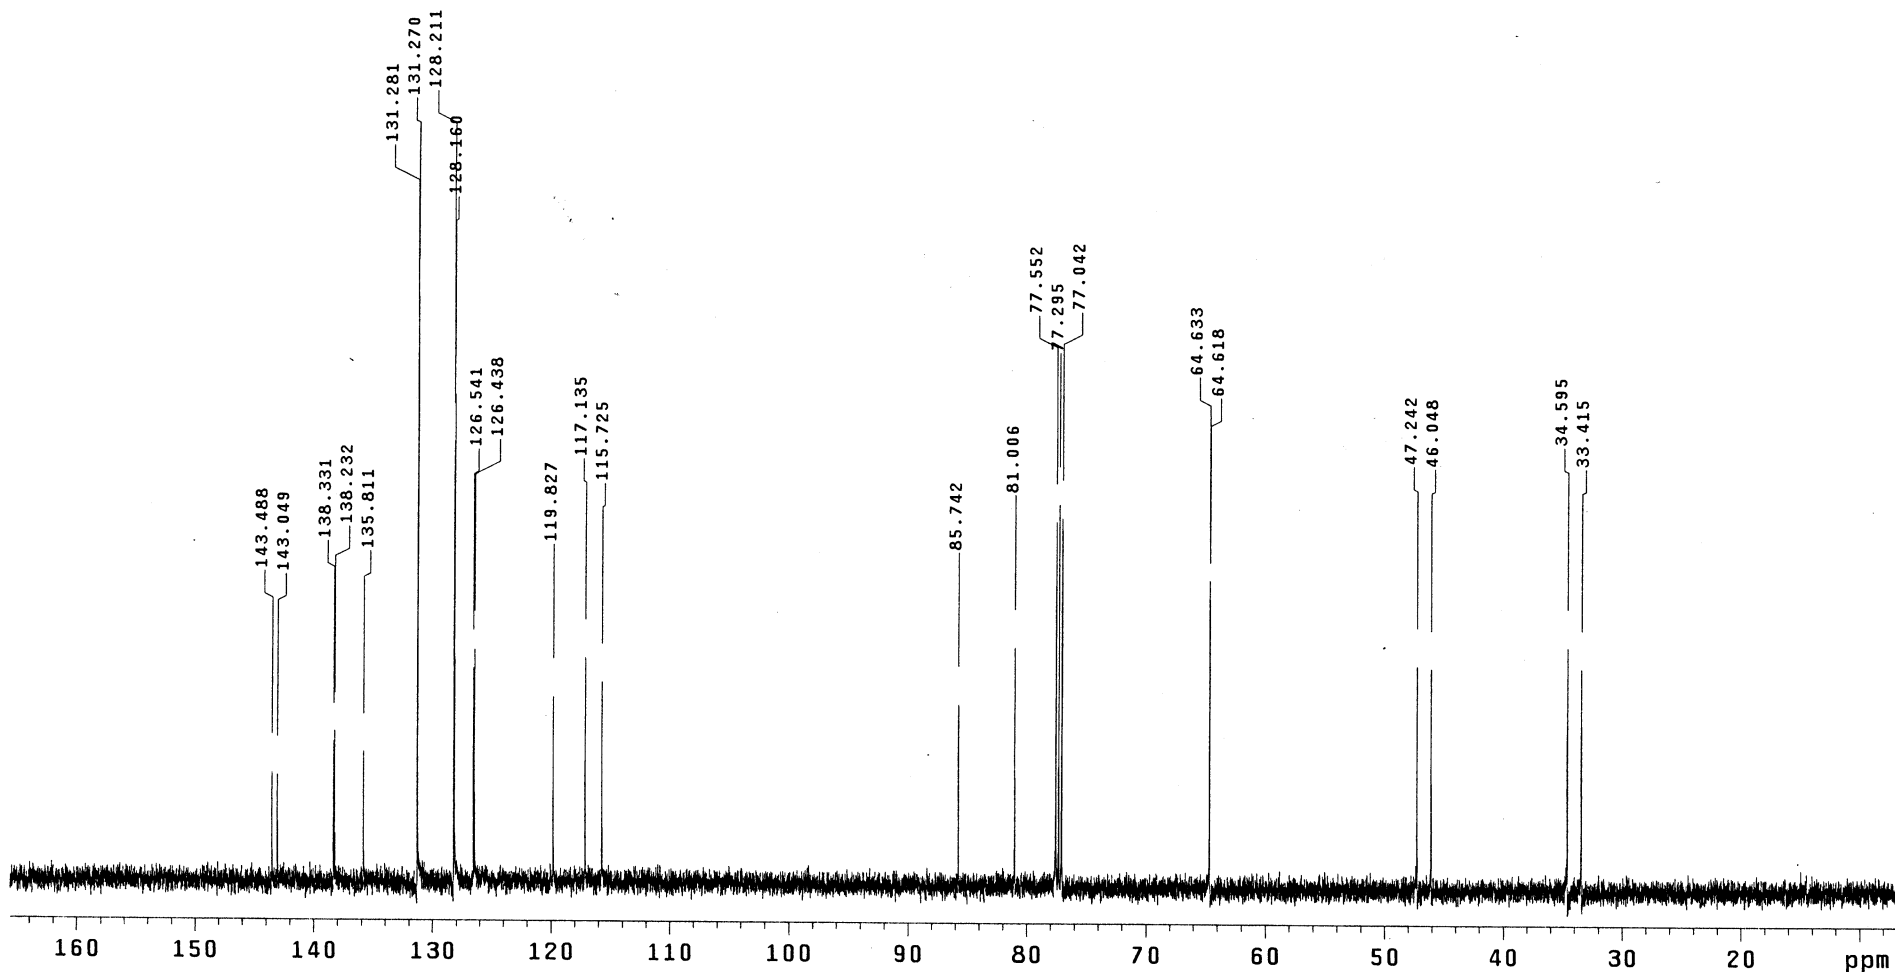

zc2-198

File: zc2-198

Pulse Sequence: s2pu1

Solvent: cdcl3

Ambient temperature

Operator: falck

File: zc2-198

INOVA-500 "fire2.swmed.edu"

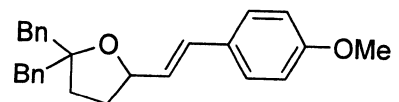

Relax. delay 1.000 sec  
Pulse 45.0 degrees  
Acq. time 2.049 sec  
Width 8000.0 Hz  
16 repetitions  
OBSERVE H1, 499.7779166 MHz  
DATA PROCESSING  
Line broadening 0.2 Hz  
FT size 65536  
Total time 0 min, 55 sec

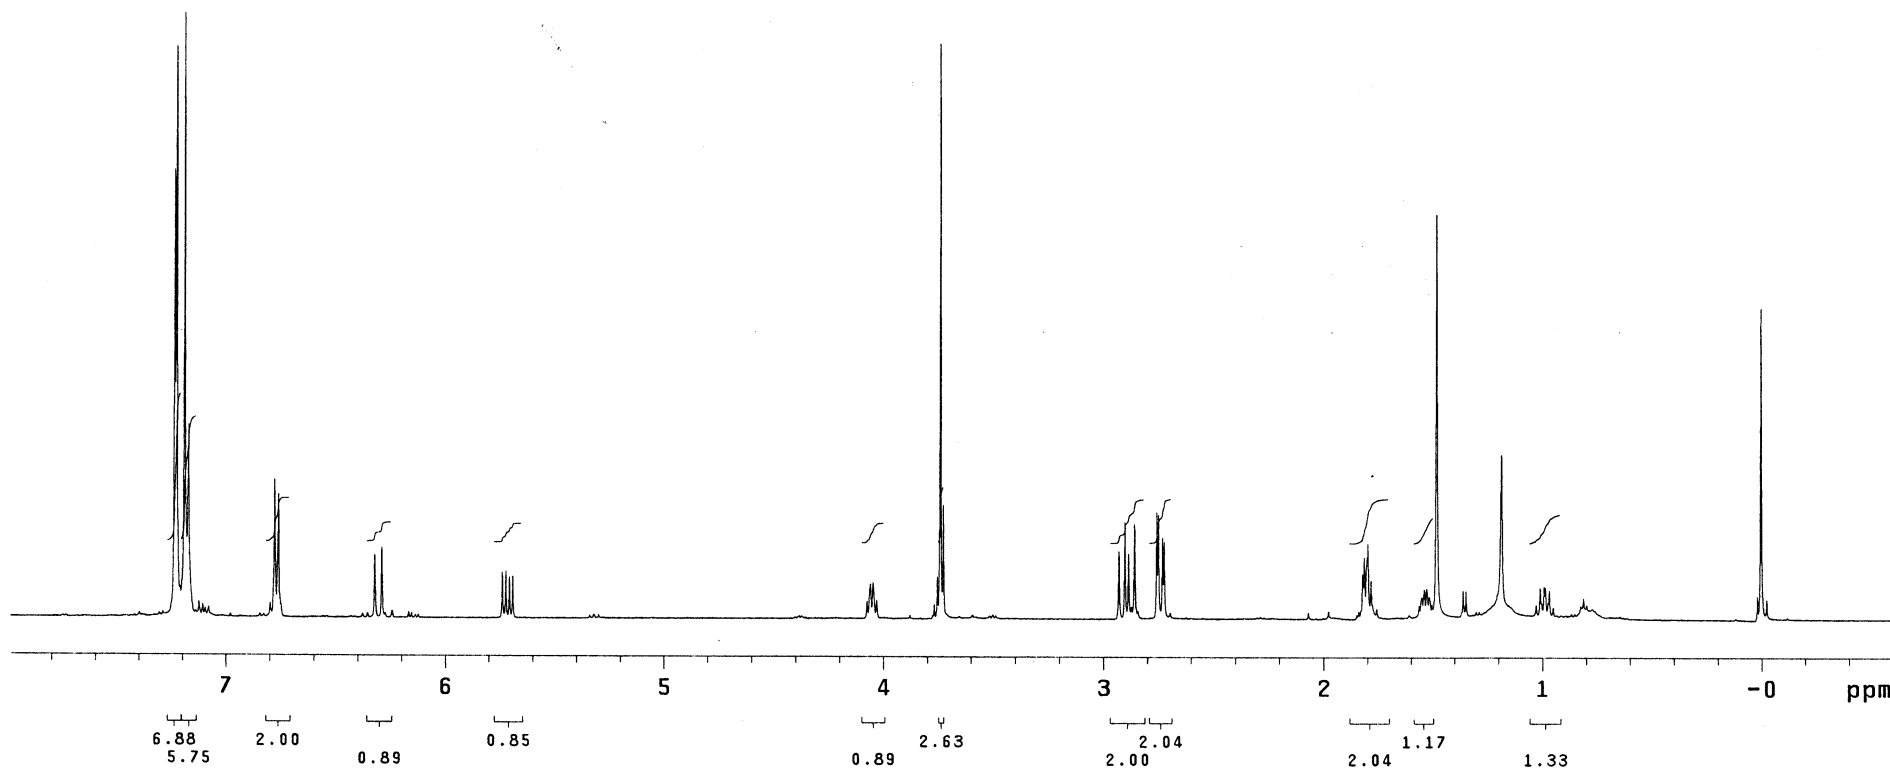

zc2-198

File: Carbon

Pulse Sequence: s2pu1

Solvent: cdc13

Ambient temperature

Operator: falck

INOVA-500 "fire2.swmed.edu"

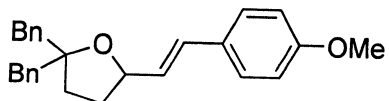

Relax. delay 1.000 sec  
Pulse 45.0 degrees  
Acq. time 1.300 sec  
Width 30165.9 Hz  
20568 repetitions  
OBSERVE C13, 125.6692167 MHz  
DECOUPLE H1, 499.7803743 MHz  
Power 36 dB  
continuously on  
WALTZ-16 modulated  
DATA PROCESSING  
Line broadening 0.5 Hz  
FT size 131072  
Total time 32 hr, 4 min, 29 sec

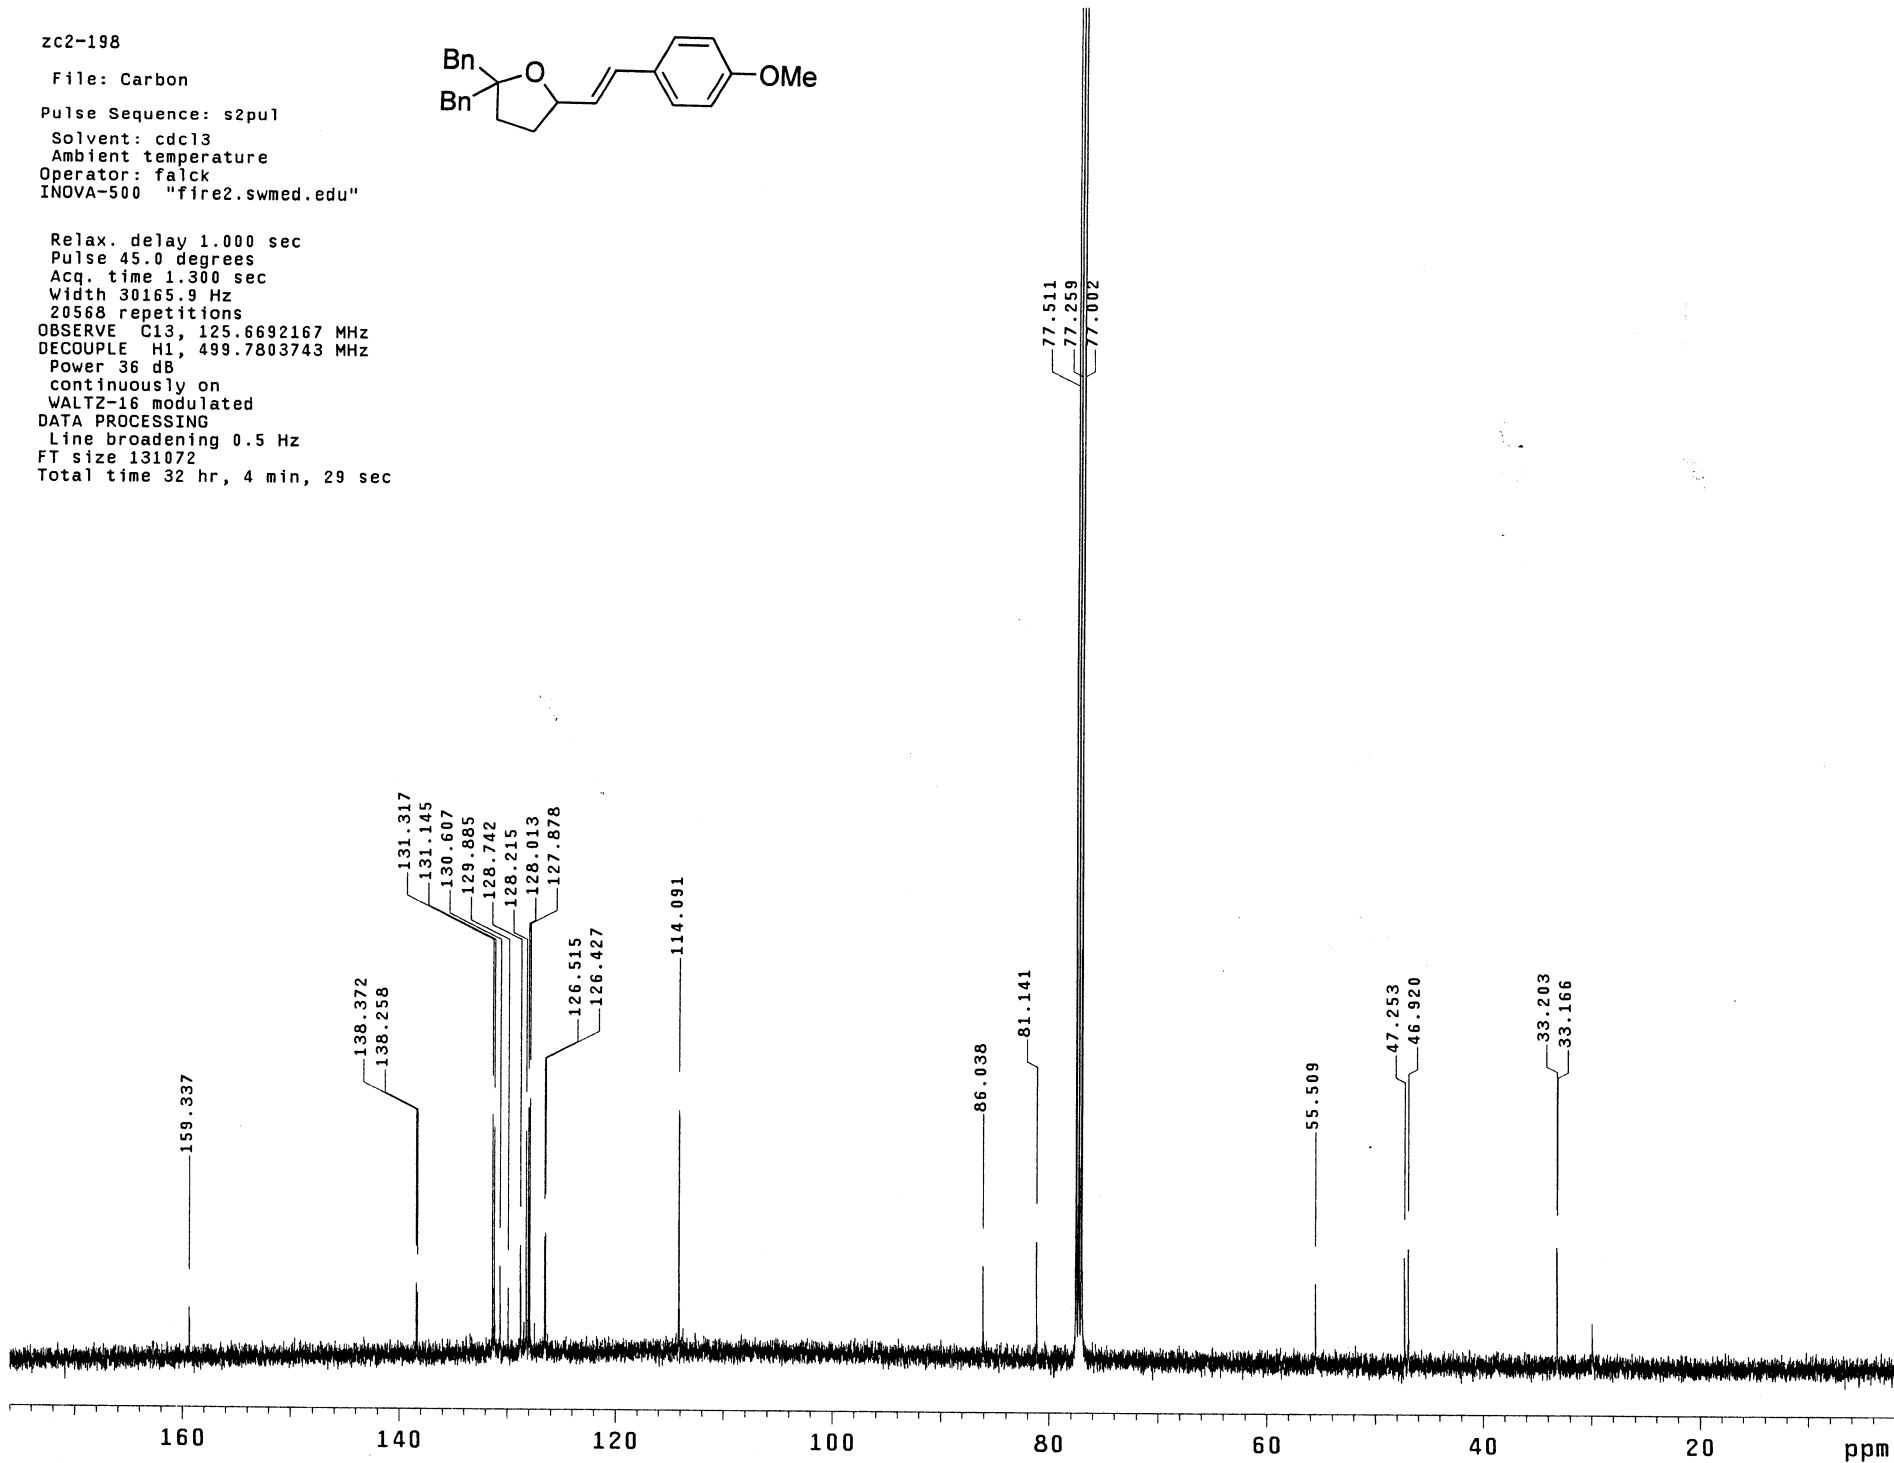



7.318  
7.303  
7.288  
7.272  
7.233  
7.219  
7.205  
7.190

5.863  
5.849  
5.834  
5.815  
5.801

5.165  
5.151  
5.131

3.694

2.858  
2.840  
2.830  
2.816  
2.800  
2.776  
2.770  
2.703  
2.694  
2.676  
2.340  
2.329  
2.319  
2.213  
2.198  
2.185  
1.869  
1.798  
1.786  
1.781  
1.652

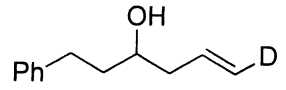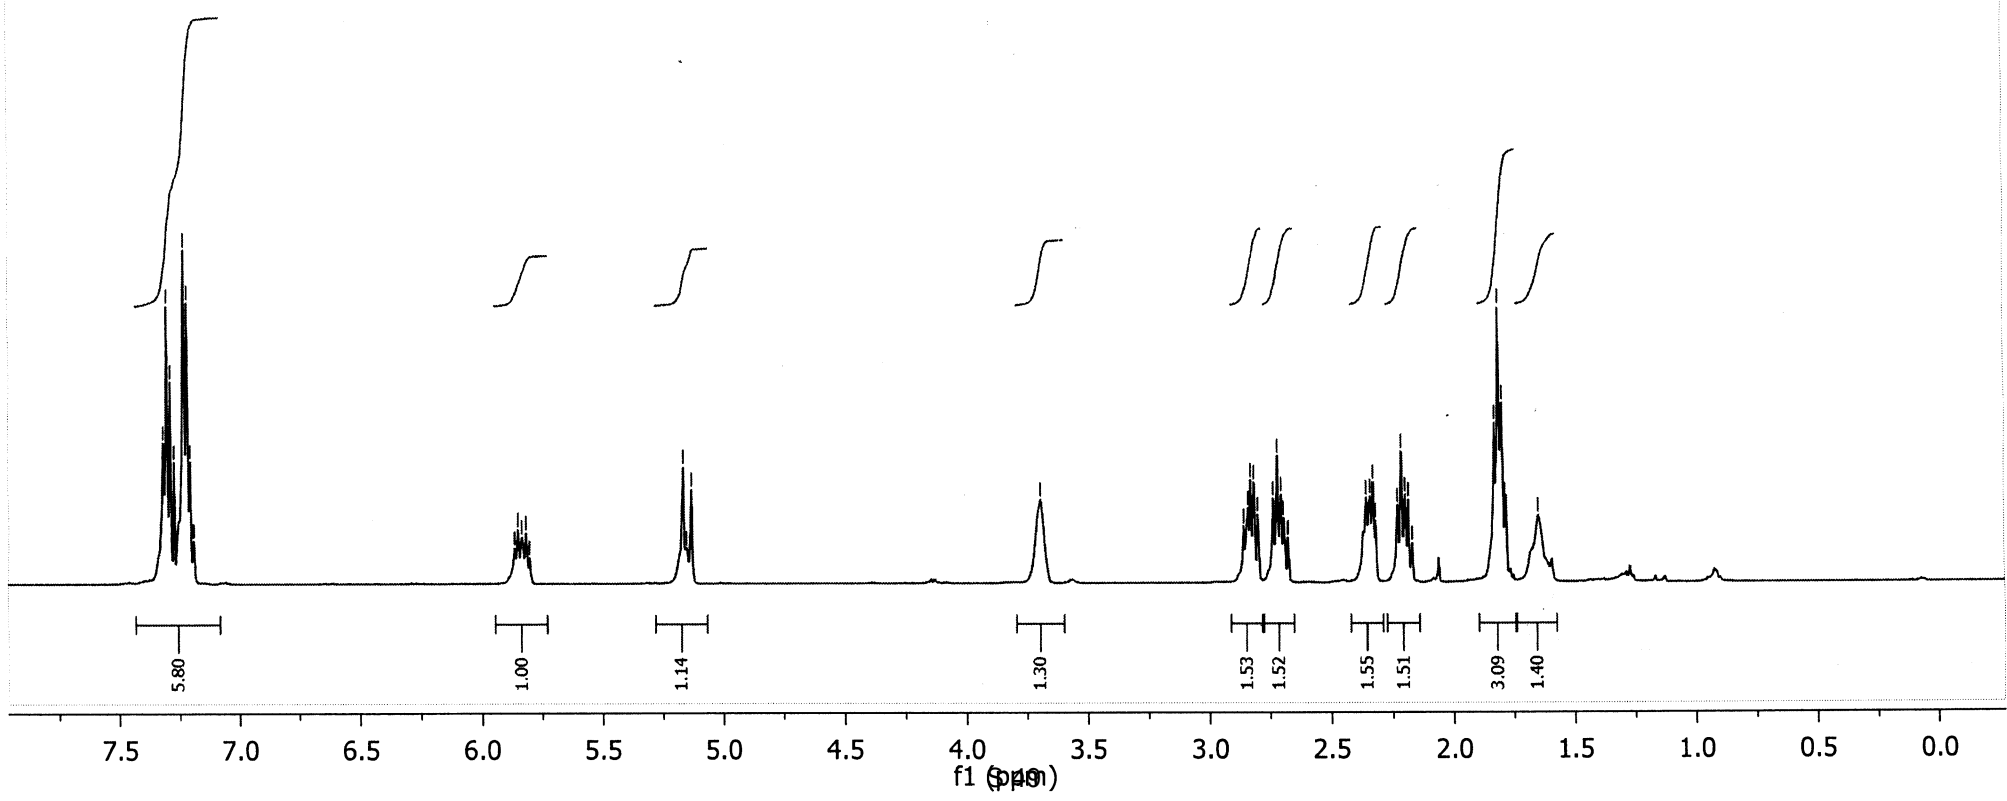

7.322  
7.307  
7.292  
7.277  
7.262  
7.247

5.837  
5.832  
5.825  
5.820

5.160  
5.140

3.696

2.862  
2.834  
2.819  
2.804  
2.740  
2.723  
2.708  
2.695  
2.680

2.360  
2.333  
2.218  
2.191  
2.175

1.831  
1.816  
1.802  
1.686

1.478

0.927

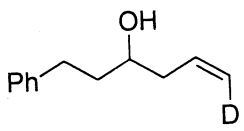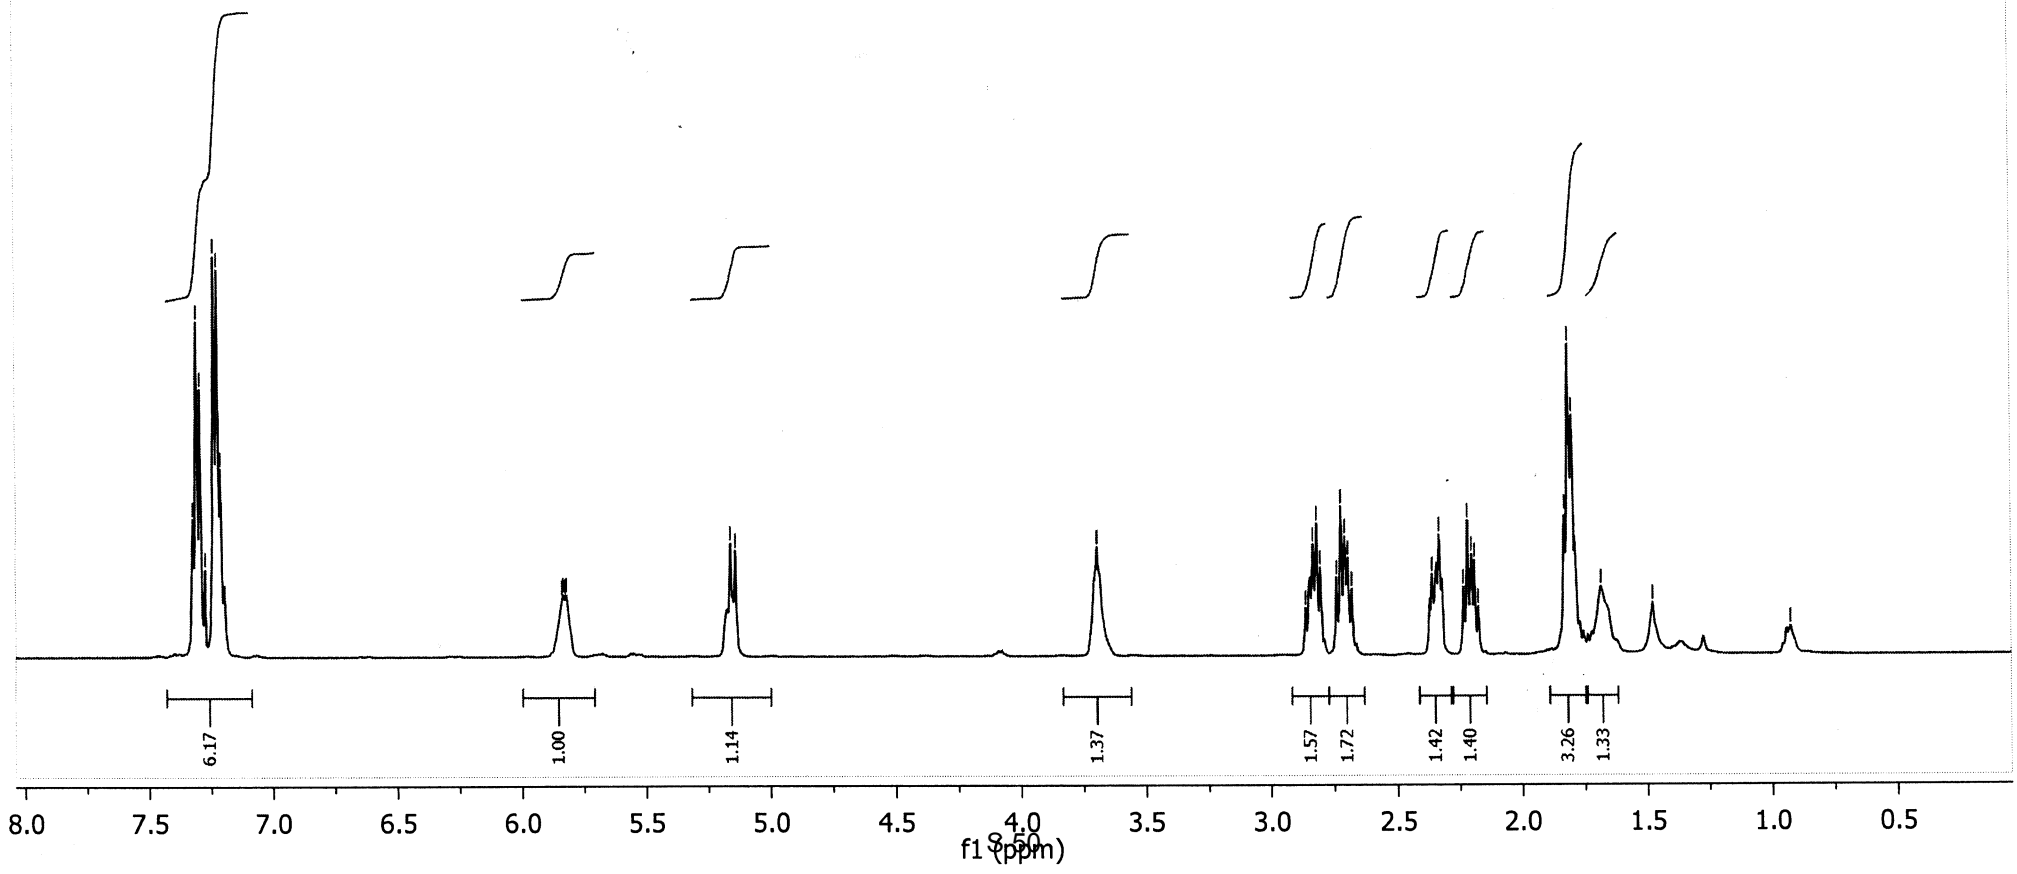

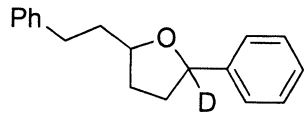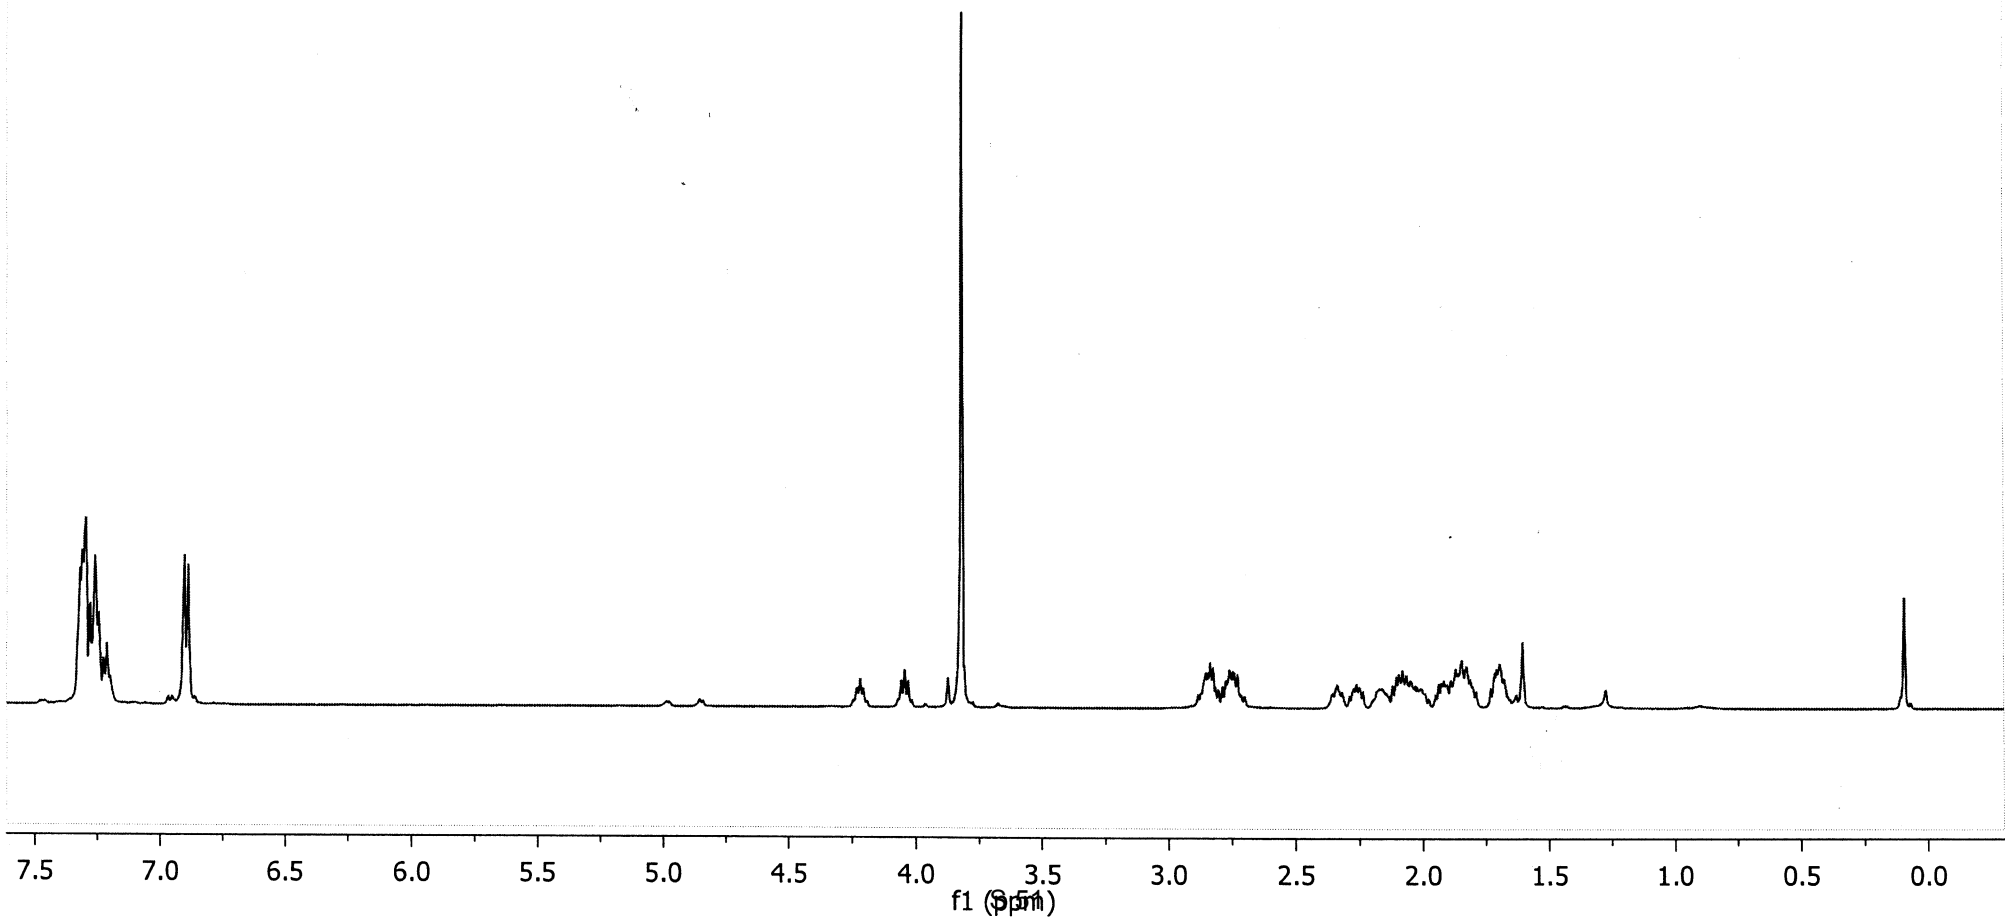

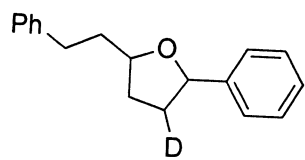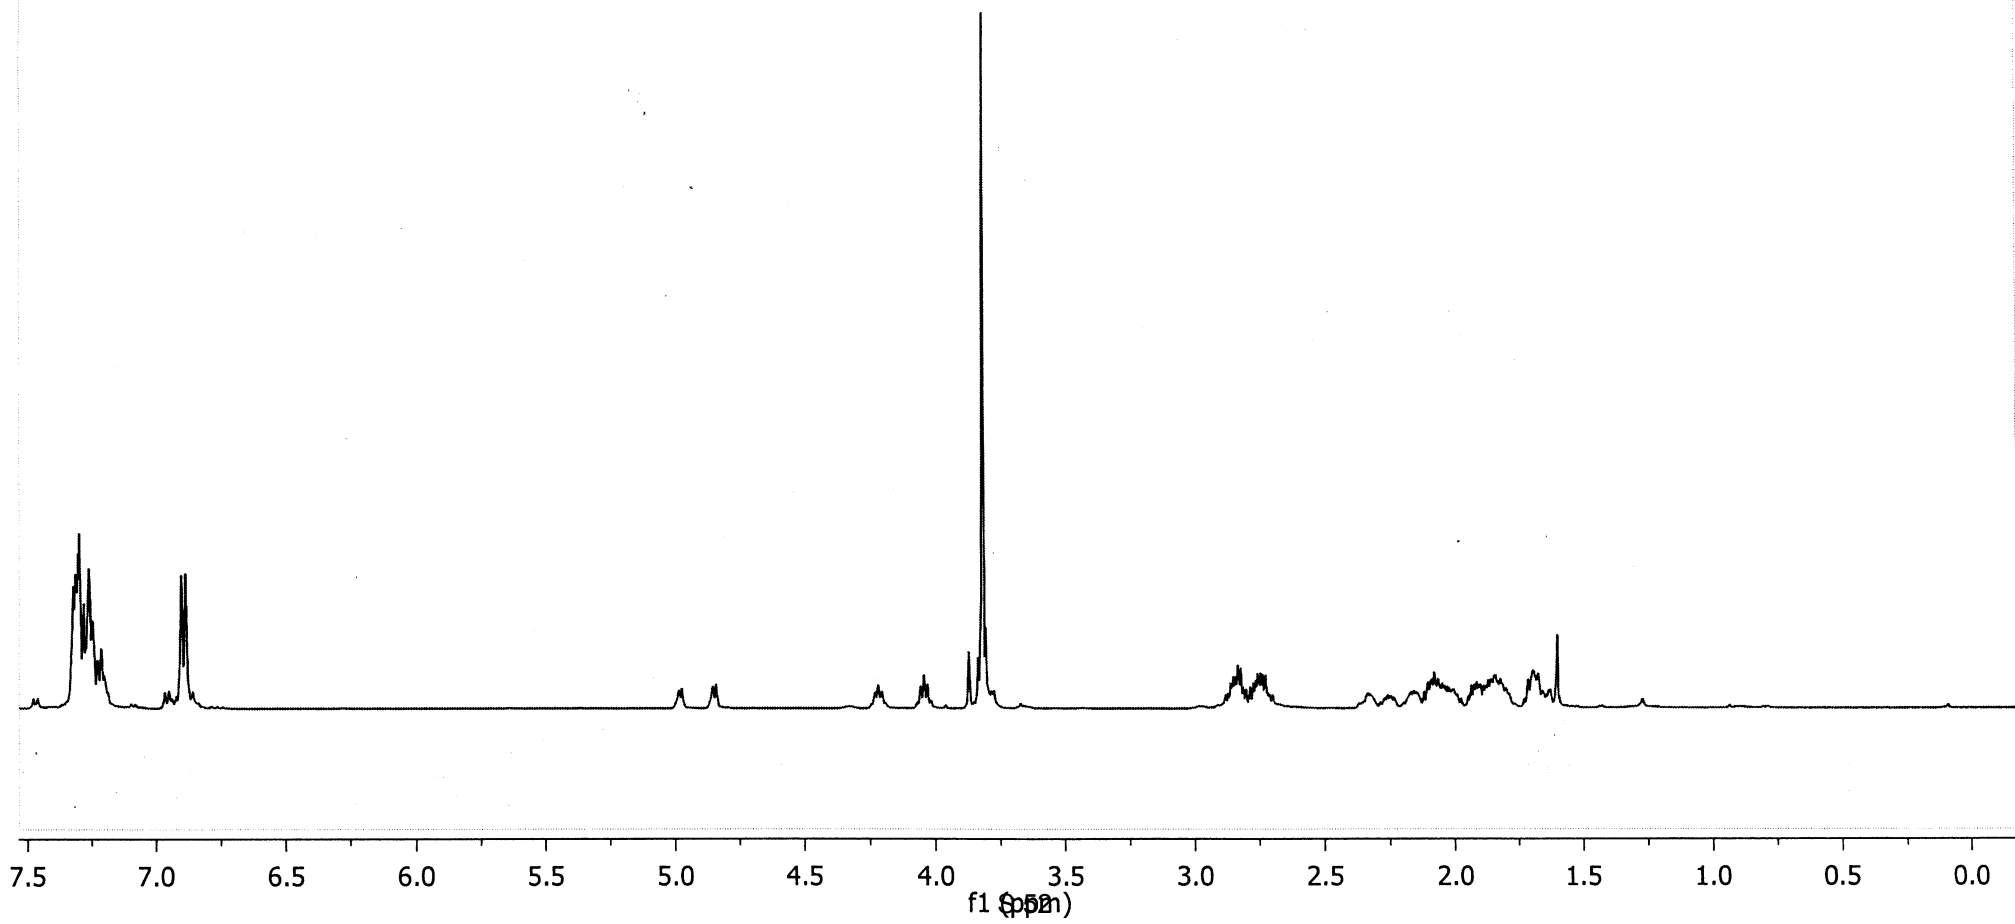

Supplement: NIHMS416936-supplement-Supporting_Information.pdf [file NIHMS416936-supplement-Supporting_Information.pdf]
